# Supplementary material
Source: ML conference proceedings conference paper supplement (https://proceedings.neurips.cc/paper_files/paper/2022/hash/07bc8125400bf4b140c332010756bd9b-Abstract.html)
Supplement: Supplementary file 1 [file 07bc8125400bf4b140c332010756bd9b-Supplemental-Conference.zip]

Archive with 1,038 entries (768 files):
- Code/
- __MACOSX/._Code
- Code/LICENSE.md
- __MACOSX/Code/._LICENSE.md
- Code/.DS_Store
- __MACOSX/Code/._.DS_Store
- Code/discovery.py
- __MACOSX/Code/._discovery.py
- Code/file_copy.py
- __MACOSX/Code/._file_copy.py
- Code/Experiments/
- Code/graph_utils.py
- __MACOSX/Code/._graph_utils.py
- Code/selected_results/
- Code/linear_utils.py
- __MACOSX/Code/._linear_utils.py
- Code/__pycache__/
- Code/README.md
- __MACOSX/Code/._README.md
- Code/results/
- Code/utils.py
- __MACOSX/Code/._utils.py
- Code/ps.py
- __MACOSX/Code/._ps.py
- Code/expt_utils.py
- __MACOSX/Code/._expt_utils.py
- Code/.git/
- Code/data/
- Code/numerical_summary.py
- Code/logistic_utils.py
- __MACOSX/Code/._logistic_utils.py
- Code/Experiments/expt_real_data_CNCCI.py
- __MACOSX/Code/Experiments/._expt_real_data_CNCCI.py
- Code/Experiments/expt_matrix.py
- Code/Experiments/expt_graph.py
- __MACOSX/Code/Experiments/._expt_graph.py
- Code/Experiments/.DS_Store
- __MACOSX/Code/Experiments/._.DS_Store
- Code/Experiments/expt_real_data_PNDC.py
- Code/Experiments/expt_linear.py
- __MACOSX/Code/Experiments/._expt_linear.py
- Code/Experiments/expt_logistic.py
- Code/Experiments/expt_real_data_CNCCI_mtx.py
- Code/selected_results/Logistic/
- __MACOSX/Code/selected_results/._Logistic
- Code/selected_results/.DS_Store
- __MACOSX/Code/selected_results/._.DS_Store
- Code/selected_results/CNCCI/
- __MACOSX/Code/selected_results/._CNCCI
- Code/selected_results/Real_data/
- Code/selected_results/Linear/
- __MACOSX/Code/selected_results/._Linear
- Code/selected_results/Matrix_high_noise/
- __MACOSX/Code/selected_results/._Matrix_high_noise
- Code/selected_results/PNDC/
- Code/selected_results/Graph_star/
- __MACOSX/Code/selected_results/._Graph_star
- Code/selected_results/Matrix/
- Code/selected_results/Graph_random/
- __MACOSX/Code/selected_results/._Graph_random
- Code/selected_results/Graph_complete/
- __MACOSX/Code/selected_results/._Graph_complete
- Code/__pycache__/expt_utils.cpython-37.pyc
- Code/__pycache__/linear_utils.cpython-37.pyc
- Code/__pycache__/graph_utils.cpython-37.pyc
- Code/__pycache__/logistic_utils.cpython-37.pyc
- Code/__pycache__/utils.cpython-37.pyc
- Code/results/logistic/
- __MACOSX/Code/results/._logistic
- Code/results/.DS_Store
- __MACOSX/Code/results/._.DS_Store
- Code/results/linear/
- Code/.git/.DS_Store
- __MACOSX/Code/.git/._.DS_Store
- Code/.git/config
- Code/.git/objects/
- Code/.git/HEAD
- Code/.git/info/
- Code/.git/logs/
- Code/.git/description
- Code/.git/hooks/
- Code/.git/refs/
- Code/.git/index
- Code/.git/COMMIT_EDITMSG
- Code/data/.DS_Store
- __MACOSX/Code/data/._.DS_Store
- Code/data/PNDC_yield.csv
- __MACOSX/Code/data/._PNDC_yield.csv
- Code/data/CNCCI_matrix.xlsx
- __MACOSX/Code/data/._CNCCI_matrix.xlsx
- Code/data/PNDC.xlsx
- __MACOSX/Code/data/._PNDC.xlsx
- Code/data/PNDC_des.csv
- __MACOSX/Code/data/._PNDC_des.csv
- Code/selected_results/Logistic/.DS_Store
- __MACOSX/Code/selected_results/Logistic/._.DS_Store
- Code/selected_results/Logistic/TS-Random-UCB-IDS_vs_20220407-233420/
- __MACOSX/Code/selected_results/Logistic/._TS-Random-UCB-IDS_vs_20220407-233420
- Code/selected_results/Logistic/Summary.pdf
- Code/selected_results/Logistic/1.pdf
- Code/selected_results/Logistic/3.pdf
- Code/selected_results/Logistic/2.pdf
- Code/selected_results/CNCCI/Random-IDS-TS-UCB_vs_20220407-172745/
- Code/selected_results/CNCCI/9.pdf
- Code/selected_results/CNCCI/.DS_Store
- __MACOSX/Code/selected_results/CNCCI/._.DS_Store
- Code/selected_results/CNCCI/8.pdf
- Code/selected_results/CNCCI/Random-IDS-TS-UCB_vs_20220407-172848/
- Code/selected_results/CNCCI/Random-IDS-TS-UCB_vs_20220407-172812/
- Code/selected_results/CNCCI/Random-IDS-TS-UCB_vs_20220407-172840/
- Code/selected_results/CNCCI/Random-IDS-TS-UCB_vs_20220407-172822/
- Code/selected_results/CNCCI/10.pdf
- Code/selected_results/CNCCI/11.pdf
- Code/selected_results/CNCCI/Random-IDS-TS-UCB_vs_20220407-172905/
- Code/selected_results/CNCCI/Random-IDS-TS-UCB_vs_20220407-172914/
- Code/selected_results/CNCCI/Random-IDS-TS-UCB_vs_20220407-172857/
- Code/selected_results/CNCCI/Random-IDS-TS-UCB_vs_20220407-172803/
- Code/selected_results/CNCCI/Random-IDS-TS-UCB_vs_20220407-172832/
- Code/selected_results/CNCCI/6.pdf
- Code/selected_results/CNCCI/7.pdf
- Code/selected_results/CNCCI/5.pdf
- Code/selected_results/CNCCI/4.pdf
- Code/selected_results/CNCCI/1.pdf
- Code/selected_results/CNCCI/Random-IDS-TS-UCB_vs_20220407-172754/
- Code/selected_results/CNCCI/3.pdf
- Code/selected_results/CNCCI/2.pdf
- Code/selected_results/Real_data/Logistic_Regression/
- __MACOSX/Code/selected_results/Real_data/._Logistic_Regression
- Code/selected_results/Real_data/.DS_Store
- __MACOSX/Code/selected_results/Real_data/._.DS_Store
- Code/selected_results/Real_data/Matrix_8_12_ratio/
- Code/selected_results/Real_data/Matrix_8_12_01/
- Code/selected_results/Real_data/Matrix_23_15_01/
- Code/selected_results/Linear/.DS_Store
- __MACOSX/Code/selected_results/Linear/._.DS_Store
- Code/selected_results/Linear/old/
- Code/selected_results/Linear/IDS-TS-UCB_vs_20220406-150507/
- __MACOSX/Code/selected_results/Linear/._IDS-TS-UCB_vs_20220406-150507
- Code/selected_results/Linear/Noise/
- Code/selected_results/Linear/Summary.pdf
- __MACOSX/Code/selected_results/Linear/._Summary.pdf
- Code/selected_results/Linear/IDS-TS-UCB_vs_20220406-155945/
- __MACOSX/Code/selected_results/Linear/._IDS-TS-UCB_vs_20220406-155945
- Code/selected_results/Linear/1.pdf
- Code/selected_results/Linear/3.pdf
- Code/selected_results/Linear/2.pdf
- Code/selected_results/Matrix_high_noise/IDS_2-Greedy-Random_vs_20220323-105235_labeled.pdf
- Code/selected_results/Matrix_high_noise/.DS_Store
- __MACOSX/Code/selected_results/Matrix_high_noise/._.DS_Store
- Code/selected_results/Matrix_high_noise/IDS-Greedy-Random_vs_20220407-225021/
- __MACOSX/Code/selected_results/Matrix_high_noise/._IDS-Greedy-Random_vs_20220407-225021
- Code/selected_results/Matrix_high_noise/Matrix.png
- __MACOSX/Code/selected_results/Matrix_high_noise/._Matrix.png
- Code/selected_results/Matrix_high_noise/script_20220323-105235/
- Code/selected_results/Matrix_high_noise/IDS-Greedy-Random_vs_20220401-100334/
- __MACOSX/Code/selected_results/Matrix_high_noise/._IDS-Greedy-Random_vs_20220401-100334
- Code/selected_results/Matrix_high_noise/IDS-Greedy-Random_vs_20220331-214216/
- __MACOSX/Code/selected_results/Matrix_high_noise/._IDS-Greedy-Random_vs_20220331-214216
- Code/selected_results/PNDC/Random-IDS-TS-UCB_vs_20220407-173801/
- __MACOSX/Code/selected_results/PNDC/._Random-IDS-TS-UCB_vs_20220407-173801
- Code/selected_results/PNDC/Random-IDS-TS-UCB_vs_20220407-174645/
- __MACOSX/Code/selected_results/PNDC/._Random-IDS-TS-UCB_vs_20220407-174645
- Code/selected_results/PNDC/9.pdf
- __MACOSX/Code/selected_results/PNDC/._9.pdf
- Code/selected_results/PNDC/.DS_Store
- __MACOSX/Code/selected_results/PNDC/._.DS_Store
- Code/selected_results/PNDC/8.pdf
- __MACOSX/Code/selected_results/PNDC/._8.pdf
- Code/selected_results/PNDC/Random-IDS-TS-UCB_vs_20220407-174901/
- __MACOSX/Code/selected_results/PNDC/._Random-IDS-TS-UCB_vs_20220407-174901
- Code/selected_results/PNDC/Random-IDS-TS-UCB_vs_20220407-174436/
- __MACOSX/Code/selected_results/PNDC/._Random-IDS-TS-UCB_vs_20220407-174436
- Code/selected_results/PNDC/Random-IDS-TS-UCB_vs_20220407-174224/
- __MACOSX/Code/selected_results/PNDC/._Random-IDS-TS-UCB_vs_20220407-174224
- Code/selected_results/PNDC/Random-IDS-TS-UCB_vs_20220407-174011/
- __MACOSX/Code/selected_results/PNDC/._Random-IDS-TS-UCB_vs_20220407-174011
- Code/selected_results/PNDC/Random-IDS-TS-UCB_vs_20220407-173542/
- __MACOSX/Code/selected_results/PNDC/._Random-IDS-TS-UCB_vs_20220407-173542
- Code/selected_results/PNDC/6.pdf
- __MACOSX/Code/selected_results/PNDC/._6.pdf
- Code/selected_results/PNDC/7.pdf
- __MACOSX/Code/selected_results/PNDC/._7.pdf
- Code/selected_results/PNDC/5.pdf
- __MACOSX/Code/selected_results/PNDC/._5.pdf
- Code/selected_results/PNDC/4.pdf
- __MACOSX/Code/selected_results/PNDC/._4.pdf
- Code/selected_results/PNDC/Random-IDS-TS-UCB_vs_20220407-175310/
- __MACOSX/Code/selected_results/PNDC/._Random-IDS-TS-UCB_vs_20220407-175310
- Code/selected_results/PNDC/1.pdf
- __MACOSX/Code/selected_results/PNDC/._1.pdf
- Code/selected_results/PNDC/Random-IDS-TS-UCB_vs_20220407-175112/
- __MACOSX/Code/selected_results/PNDC/._Random-IDS-TS-UCB_vs_20220407-175112
- Code/selected_results/PNDC/3.pdf
- __MACOSX/Code/selected_results/PNDC/._3.pdf
- Code/selected_results/PNDC/2.pdf
- __MACOSX/Code/selected_results/PNDC/._2.pdf
- Code/selected_results/Graph_star/TS-IDS-Random_vs_20220406-174703/
- __MACOSX/Code/selected_results/Graph_star/._TS-IDS-Random_vs_20220406-174703
- Code/selected_results/Graph_star/.DS_Store
- __MACOSX/Code/selected_results/Graph_star/._.DS_Store
- Code/selected_results/Graph_star/TS-IDS-Random_vs_20220406-173659/
- __MACOSX/Code/selected_results/Graph_star/._TS-IDS-Random_vs_20220406-173659
- Code/selected_results/Graph_star/TS-IDS-Random_vs_20220420-200900/
- __MACOSX/Code/selected_results/Graph_star/._TS-IDS-Random_vs_20220420-200900
- Code/selected_results/Matrix/IDS-Greedy-Random_vs_20220407-225753/
- __MACOSX/Code/selected_results/Matrix/._IDS-Greedy-Random_vs_20220407-225753
- Code/selected_results/Graph_random/.DS_Store
- __MACOSX/Code/selected_results/Graph_random/._.DS_Store
- Code/selected_results/Graph_random/TS-IDS-Random_vs_20220406-180320/
- __MACOSX/Code/selected_results/Graph_random/._TS-IDS-Random_vs_20220406-180320
- Code/selected_results/Graph_complete/.DS_Store
- __MACOSX/Code/selected_results/Graph_complete/._.DS_Store
- Code/selected_results/Graph_complete/TS-IDS-Random_vs_20220406-175808/
- __MACOSX/Code/selected_results/Graph_complete/._TS-IDS-Random_vs_20220406-175808
- Code/results/logistic/.DS_Store
- __MACOSX/Code/results/logistic/._.DS_Store
- Code/results/logistic/ENS-Random-IDS_vs_20220727-231848/
- Code/results/logistic/ENS-Random-IDS_vs_20220727-231920/
- Code/results/linear/IDS-ENS_vs_20220727-230417/
- Code/results/linear/.DS_Store
- __MACOSX/Code/results/linear/._.DS_Store
- Code/results/linear/IDS-ENS_vs_20220727-232446/
- Code/results/linear/IDS-TS-UCB-ENS_vs_20220727-224701/
- Code/.git/objects/61/
- Code/.git/objects/0d/
- Code/.git/objects/95/
- Code/.git/objects/66/
- Code/.git/objects/50/
- Code/.git/objects/68/
- Code/.git/objects/3b/
- Code/.git/objects/6f/
- Code/.git/objects/9e/
- Code/.git/objects/04/
- Code/.git/objects/6a/
- Code/.git/objects/32/
- Code/.git/objects/35/
- Code/.git/objects/69/
- Code/.git/objects/3d/
- Code/.git/objects/0b/
- Code/.git/objects/93/
- Code/.git/objects/0e/
- Code/.git/objects/60/
- Code/.git/objects/34/
- Code/.git/objects/5a/
- Code/.git/objects/5f/
- Code/.git/objects/05/
- Code/.git/objects/a3/
- Code/.git/objects/b5/
- Code/.git/objects/b2/
- Code/.git/objects/d9/
- Code/.git/objects/ac/
- Code/.git/objects/ad/
- Code/.git/objects/bb/
- Code/.git/objects/d7/
- Code/.git/objects/d0/
- Code/.git/objects/b3/
- Code/.git/objects/df/
- Code/.git/objects/a5/
- Code/.git/objects/d1/
- Code/.git/objects/d6/
- Code/.git/objects/ab/
- Code/.git/objects/e5/
- Code/.git/objects/e2/
- Code/.git/objects/eb/
- Code/.git/objects/c7/
- Code/.git/objects/ee/
- Code/.git/objects/c9/
- Code/.git/objects/f5/
- Code/.git/objects/e3/
- Code/.git/objects/e4/
- Code/.git/objects/fe/
- Code/.git/objects/fb/
- Code/.git/objects/ed/
- Code/.git/objects/c1/
- Code/.git/objects/c6/
- Code/.git/objects/18/
- Code/.git/objects/27/
- Code/.git/objects/4b/
- Code/.git/objects/pack/
- Code/.git/objects/11/
- Code/.git/objects/7c/
- Code/.git/objects/89/
- Code/.git/objects/45/
- Code/.git/objects/1f/
- Code/.git/objects/73/
- Code/.git/objects/87/
- Code/.git/objects/80/
- Code/.git/objects/1a/
- Code/.git/objects/7b/
- Code/.git/objects/10/
- Code/.git/objects/19/
- Code/.git/objects/26/
- Code/.git/objects/4d/
- Code/.git/objects/75/
- Code/.git/objects/86/
- Code/.git/objects/44/
- Code/.git/objects/88/
- Code/.git/objects/9f/
- Code/.git/objects/6b/
- Code/.git/objects/00/
[truncated: 738 more entries]
