# Supplementary material
Source: ML conference proceedings conference paper supplement (https://proceedings.neurips.cc/paper_files/paper/2022/hash/07bc8125400bf4b140c332010756bd9b-Abstract.html)
Supplement: Supplementary file 1 [file 07bc8125400bf4b140c332010756bd9b-Supplemental-Conference.zip › Code/data/PNDC_des.csv]

1.21	1.37	380	250	1.5
1.21	1.37	380	100	1.5
1.21	1.37	380	10	1.5
1.21	1.37	380	1	1.5
1.21	1.37	380	250	3
1.21	1.37	380	100	3
1.21	1.37	380	10	3
1.21	1.37	380	1	3
0.66	1.51	380	250	1.5
0.66	1.51	380	100	1.5
0.66	1.51	380	10	1.5
0.66	1.51	380	1	1.5
0.66	1.51	380	250	3
0.66	1.51	380	100	3
0.66	1.51	380	10	3
0.66	1.51	380	1	3
0.75	2.11	347	250	1.5
0.75	2.11	347	100	1.5
0.75	2.11	347	10	1.5
0.75	2.11	347	1	1.5
0.75	2.11	347	250	3
0.75	2.11	347	100	3
0.75	2.11	347	10	3
0.75	2.11	347	1	3
0.31	2.19	375	250	1.5
0.31	2.19	375	100	1.5
0.31	2.19	375	10	1.5
0.31	2.19	375	1	1.5
0.31	2.19	375	250	3
0.31	2.19	375	100	3
0.31	2.19	375	10	3
0.31	2.19	375	1	3
0.77	1.33	452	250	1.5
0.77	1.33	452	100	1.5
0.77	1.33	452	10	1.5
0.77	1.33	452	1	1.5
0.77	1.33	452	250	3
0.77	1.33	452	100	3
0.77	1.33	452	10	3
0.77	1.33	452	1	3
1.82	0.68	300	250	1.5
1.82	0.68	300	100	1.5
1.82	0.68	300	10	1.5
1.82	0.68	300	1	1.5
1.82	0.68	300	250	3
1.82	0.68	300	100	3
1.82	0.68	300	10	3
1.82	0.68	300	1	3
0.78	1.27	528	250	1.5
0.78	1.27	528	100	1.5
0.78	1.27	528	10	1.5
0.78	1.27	528	1	1.5
0.78	1.27	528	250	3
0.78	1.27	528	100	3
0.78	1.27	528	10	3
0.78	1.27	528	1	3
1.18	0.84	549	250	1.5
1.18	0.84	549	100	1.5
1.18	0.84	549	10	1.5
1.18	0.84	549	1	1.5
1.18	0.84	549	250	3
1.18	0.84	549	100	3
1.18	0.84	549	10	3
1.18	0.84	549	1	3
2.3	0.35	417	250	1.5
2.3	0.35	417	100	1.5
2.3	0.35	417	10	1.5
2.3	0.35	417	1	1.5
2.3	0.35	417	250	3
2.3	0.35	417	100	3
2.3	0.35	417	10	3
2.3	0.35	417	1	3
2.3	1.27	325	250	1.5
2.3	1.27	325	100	1.5
2.3	1.27	325	10	1.5
2.3	1.27	325	1	1.5
2.3	1.27	325	250	3
2.3	1.27	325	100	3
2.3	1.27	325	10	3
2.3	1.27	325	1	3
