# Supplementary material
Source: ML conference proceedings conference paper supplement (https://proceedings.neurips.cc/paper_files/paper/2022/hash/07bc8125400bf4b140c332010756bd9b-Abstract.html)
Supplement: Supplementary file 1 [file 07bc8125400bf4b140c332010756bd9b-Supplemental-Conference.zip › Code/discovery.py]

import numpy as np
import scipy.linalg as la
import numpy as np
import scipy as sc
import scipy.stats

import pdb


# data generator
def gen_low_rank(m1, m2, r, shape = 1.0, scale = 1.0):
    gamma = np.random.gamma(shape = shape, scale = scale, size = 1)
    U = np.random.randn(m1 * r).reshape((m1, r)) * gamma
    V = np.random.randn(m2 * r).reshape((m2, r)) * gamma
    return U @ V.transpose()

M = gen_low_rank(10, 10, 3)
