# Supplementary material
Source: ML conference proceedings conference paper supplement (https://proceedings.neurips.cc/paper_files/paper/2022/hash/07bc8125400bf4b140c332010756bd9b-Abstract.html)
Supplement: Supplementary file 1 [file 07bc8125400bf4b140c332010756bd9b-Supplemental-Conference.zip › Code/Experiments/expt_real_data_PNDC.py]

import numpy as np
import joblib
import importlib

import pandas as pd
from utils import *
from logistic_utils import *
from linear_utils import *
import expt_utils as expt_utils
from sklearn.preprocessing import normalize
# importlib.reload(expt_utils)


algos_dict = {
  'Random': [linear_solver, {}, 50, 'Random', '-sg'],
  'IDS': [IDS_linear, {"M": 1000}, 50, 'IDS', '-sm'],
  'TS': [TS_linear, {}, 50, 'TS', '-ob'],
  'UCB': [UCB_linear, {}, 50, 'UCB', '-y^'],
  # 'Random': [graph_solver, {}, 10, 'Random', '-sm']
}

prob_dict = {
  "m": 80,
  "noise": 1.0,
  "d": 5
}

x_dat = pd.read_csv("data/PNDC_des.csv", header = None).to_numpy()
y_dat = pd.read_csv("data/PNDC_yield.csv", header = None).to_numpy()

for i in range(11):
  prob = linear_discover(**prob_dict)
  x = x_dat
  x = normalize(x, axis=0, norm='l2')
  prob.x = x
  prob.y = y_dat[:, i] / 100.0

  script_file = 'expt_real_data_PNDC.py'

  # expt_utils.algos_metrics(
  #     prob_dict, algos_dict, linear_discover, T = 500,
  #     results_dir='results/linear/', script_file=script_file
  #     )

  expt_utils.algos_real_data(
      prob, algos_dict, linear_discover, T = 80,
      results_dir='results/PNDC/', script_file=script_file
      )
