# Supplementary material
Source: ML conference proceedings conference paper supplement (https://proceedings.neurips.cc/paper_files/paper/2022/hash/07bc8125400bf4b140c332010756bd9b-Abstract.html)
Supplement: Supplementary file 1 [file 07bc8125400bf4b140c332010756bd9b-Supplemental-Conference.zip › Code/README.md]

# Run IDS for Apdative Sampling for Discovery

## Code Organizations
Use `Experiments/expt_*.py` to run IDS under different models. We implemented 
- `expt_graph.py` for graph models
- `expt_linear.py` for linear models
- `expt_logistic.py` for logistic regressin models
- `expt_matrix.py` for low-rank matrix models
- `expt_real_data_CNCCI.py` for CNCCI dataset as a linear regression model
- `expt_real_data_PNDC.py` for PNDC dataset as a linear regression model

Hyperparameters are setup in `expt_*.py` for each algorithm. Run `python Experiments/expt_*.py` to generate results.

## Datasets

The two datasets are included in **PNDC.xlsx** and **CNCCI.xlsx** under data folder in the  code. Each file has two sheets for yield and descriptors respectively.
