# Supplementary material
Source: ML conference proceedings conference paper supplement (https://proceedings.neurips.cc/paper_files/paper/2022/hash/07bc8125400bf4b140c332010756bd9b-Abstract.html)
Supplement: Supplementary file 1 [file 07bc8125400bf4b140c332010756bd9b-Supplemental-Conference.zip › Code/selected_results/Matrix_high_noise/script_20220323-105235/expt_matrix.py]

import numpy as np

import importlib

from utils import *
import expt_utils as expt_utils
# importlib.reload(expt_utils)


algos_dict = {
	# 'IDS_2': [IDS_matrix,
		# {"gamma": 2, 'update': 5}, 1, 'IDS_2', '-ob'],
	# 'IDS_sig05': [IDS_matrix,
		# {"gamma": 3, "sigma": 0.5, 'update': 20}, 1, 'IDS_sig05', '-sm'],
	# 'IDS_sig1': [IDS_matrix,
		# {"gamma": 3, "sigma": 1.0, 'update': 20}, 1, 'IDS_sig1', '-ob'],
	'IDS_2': [IDS_matrix,
		{"gamma": 3, "sigma": 0.5, 'update': 10}, 5, 'IDS_2', '-og'],
	'Greedy': [IDS_matrix,
		{"gamma": 3, "sigma": 0.5, 'update': 10, 'greedy': True}, 5, 'Greedy', '-sm'],
	# 'IDS_3': [IDS_matrix,
	# 	{"gamma": 3, "sigma": 0.5, 'update': 10}, 1, 'IDS_3', '-ob'],
	# 'Ex_Commt': [EC_matrix,
	# 	{"thrd": 0.25, "update": 10}, 1, 'EC', '-sm'],
	'Random': [matrix_solver, {}, 1, 'Random', '^y']
}

prob_dict = {
	"m1": 30,
	"m2": 30,
	"R": 5,
	"noise": 2.0
}

script_file = 'expt_matrix.py'

expt_utils.algos_vs_var_metrics(
		prob_dict, algos_dict, matrix_discover, T = 200,
		results_dir='results/matrix', script_file=script_file
		)
