# Supplementary material (part 2 of 2)
Source: ML conference proceedings conference paper supplement (https://proceedings.neurips.cc/paper_files/paper/2022/hash/07bc8125400bf4b140c332010756bd9b-Abstract.html)

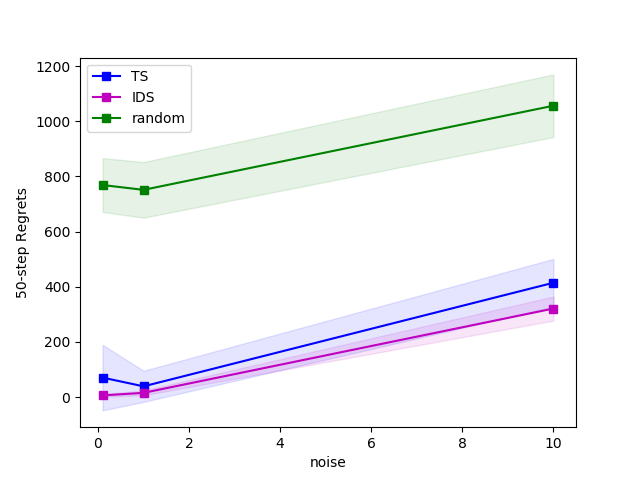

Supplement: Supplementary file 1 [file 07bc8125400bf4b140c332010756bd9b-Supplemental-Conference.zip › Code/selected_results/Graph_star/TS-IDS-Random_vs_20220420-200900/TS-IDS-Random_vs_20220420-200900_summarized_labeled.png]

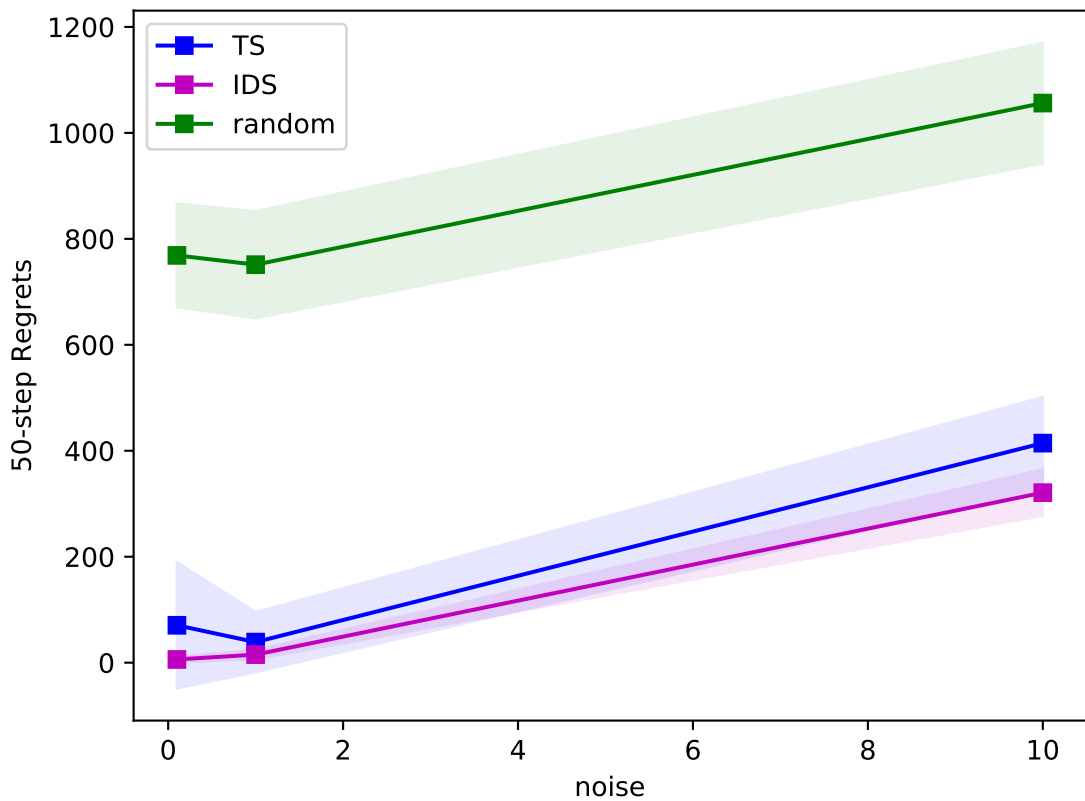

Supplement: Supplementary file 1 [file 07bc8125400bf4b140c332010756bd9b-Supplemental-Conference.zip › Code/selected_results/Graph_star/TS-IDS-Random_vs_20220420-200900/TS-IDS-Random_vs_20220420-200900_summarized_labeled.pdf]

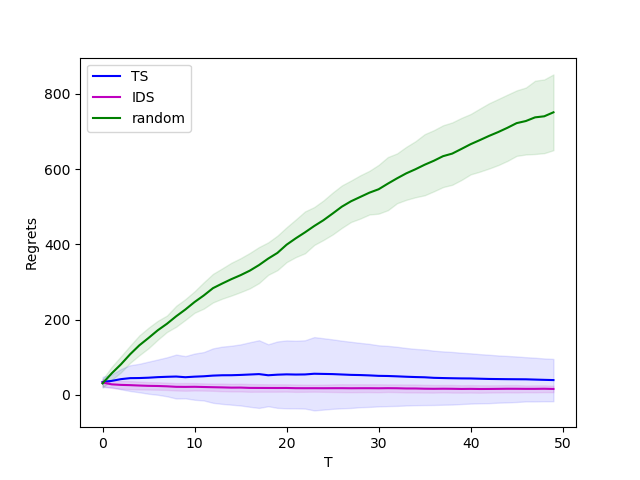

Supplement: Supplementary file 1 [file 07bc8125400bf4b140c332010756bd9b-Supplemental-Conference.zip › Code/selected_results/Graph_star/TS-IDS-Random_vs_20220420-200900/TS-IDS-Random_vs_20220420-200900_1_labeled.png]

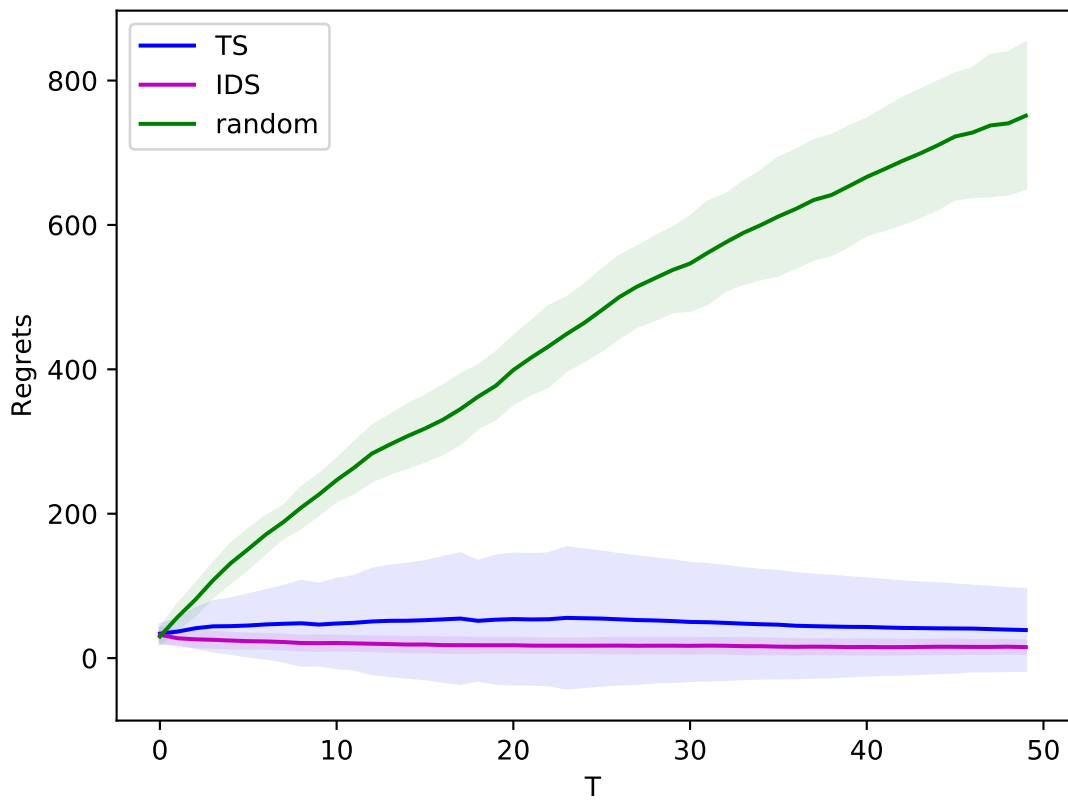

Supplement: Supplementary file 1 [file 07bc8125400bf4b140c332010756bd9b-Supplemental-Conference.zip › Code/selected_results/Graph_star/TS-IDS-Random_vs_20220420-200900/TS-IDS-Random_vs_20220420-200900_1_labeled.pdf]

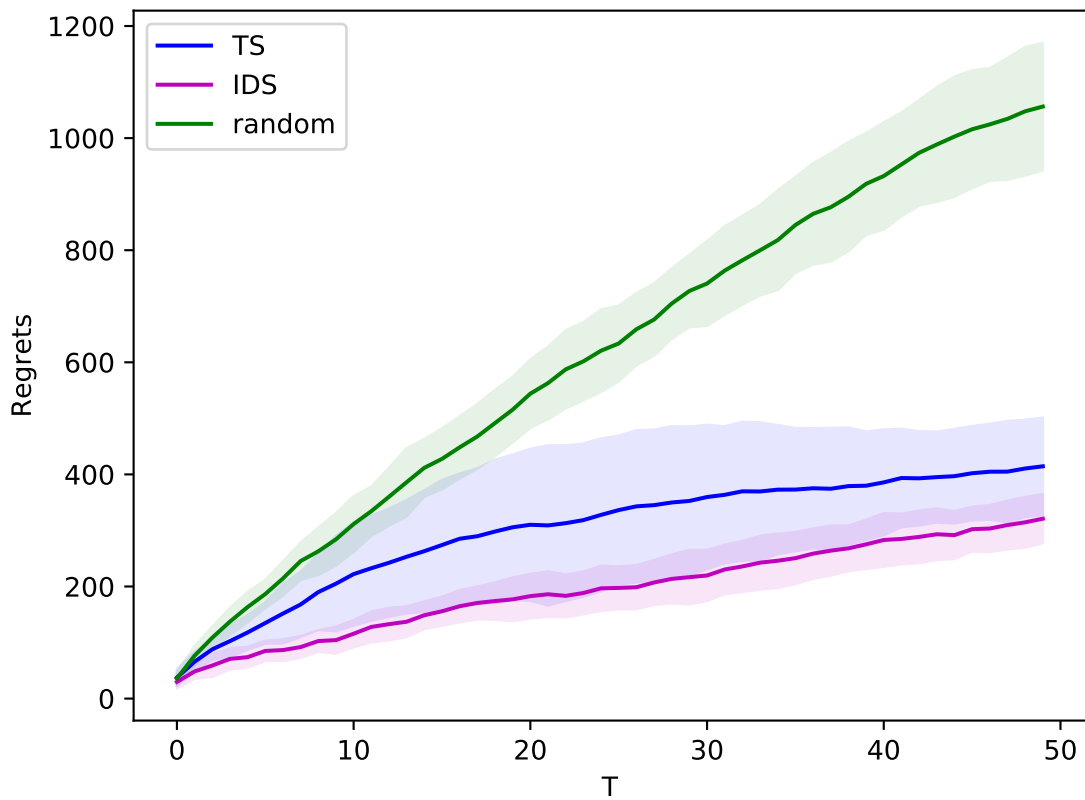

Supplement: Supplementary file 1 [file 07bc8125400bf4b140c332010756bd9b-Supplemental-Conference.zip › Code/selected_results/Graph_star/TS-IDS-Random_vs_20220420-200900/TS-IDS-Random_vs_20220420-200900_2_labeled.pdf]

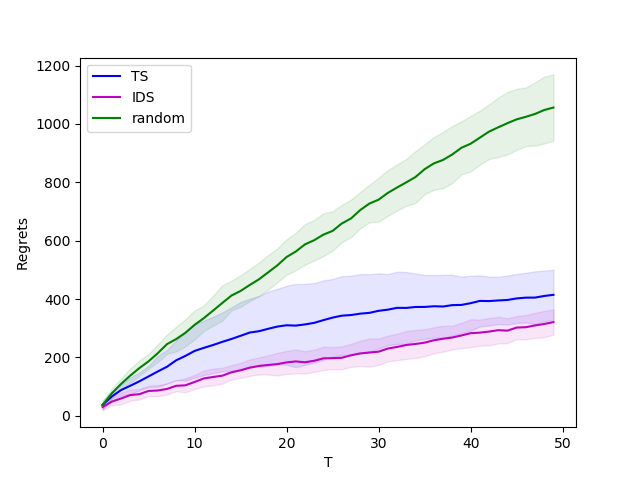

Supplement: Supplementary file 1 [file 07bc8125400bf4b140c332010756bd9b-Supplemental-Conference.zip › Code/selected_results/Graph_star/TS-IDS-Random_vs_20220420-200900/TS-IDS-Random_vs_20220420-200900_2_labeled.png]

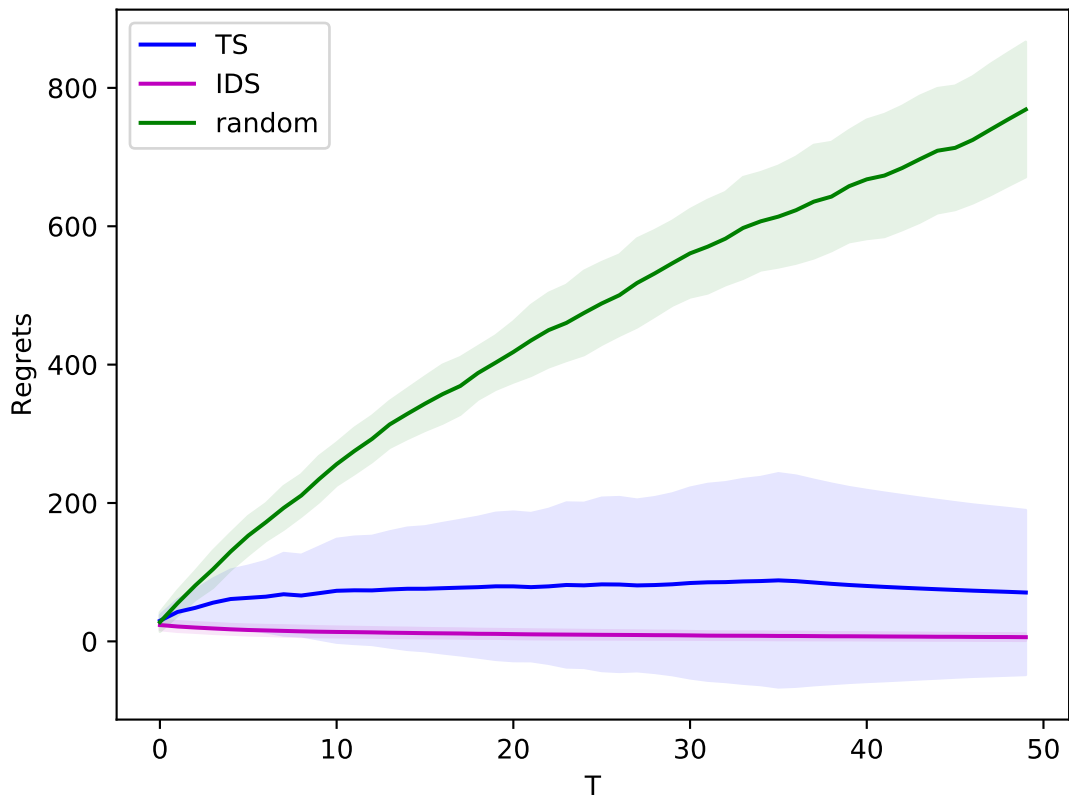

Supplement: Supplementary file 1 [file 07bc8125400bf4b140c332010756bd9b-Supplemental-Conference.zip › Code/selected_results/Graph_star/TS-IDS-Random_vs_20220420-200900/11.pdf]

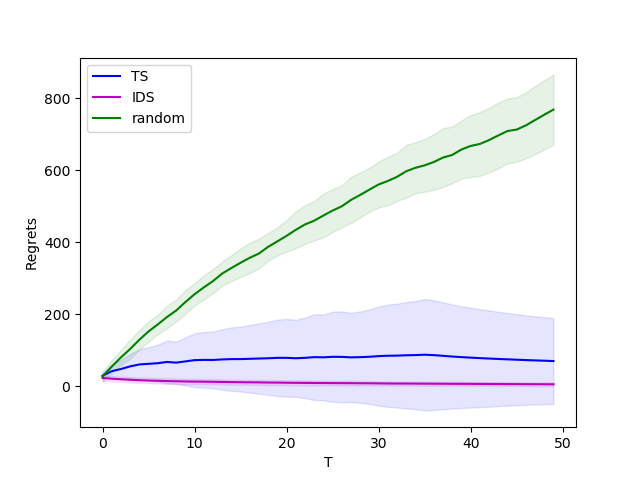

Supplement: Supplementary file 1 [file 07bc8125400bf4b140c332010756bd9b-Supplemental-Conference.zip › Code/selected_results/Graph_star/TS-IDS-Random_vs_20220420-200900/TS-IDS-Random_vs_20220420-200900_0_labeled.png]

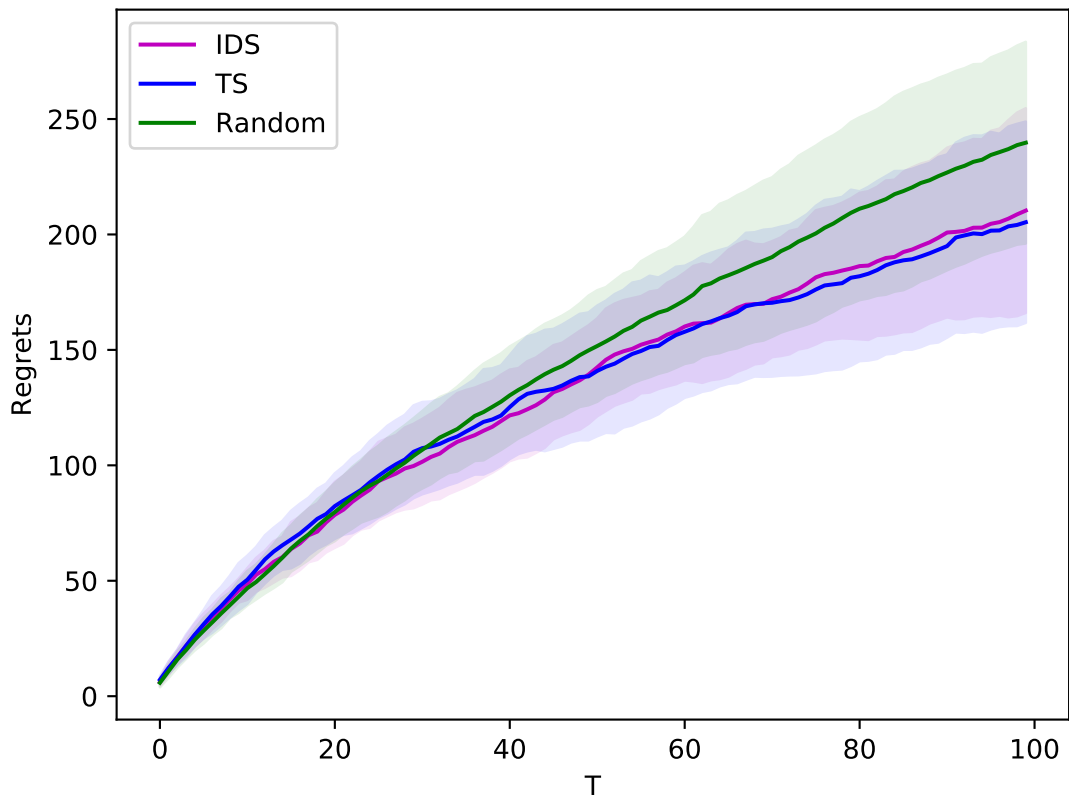

Supplement: Supplementary file 1 [file 07bc8125400bf4b140c332010756bd9b-Supplemental-Conference.zip › Code/selected_results/Matrix/IDS-Greedy-Random_vs_20220407-225753/IDS-Greedy-Random_vs_20220407-225753_0_labeled.pdf]

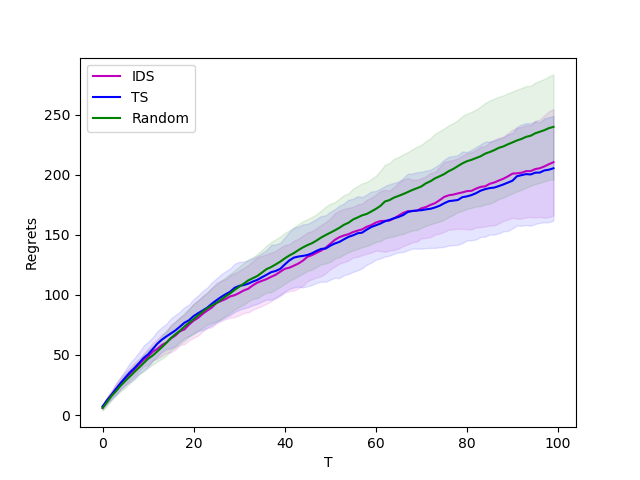

Supplement: Supplementary file 1 [file 07bc8125400bf4b140c332010756bd9b-Supplemental-Conference.zip › Code/selected_results/Matrix/IDS-Greedy-Random_vs_20220407-225753/IDS-Greedy-Random_vs_20220407-225753_0_labeled.png]

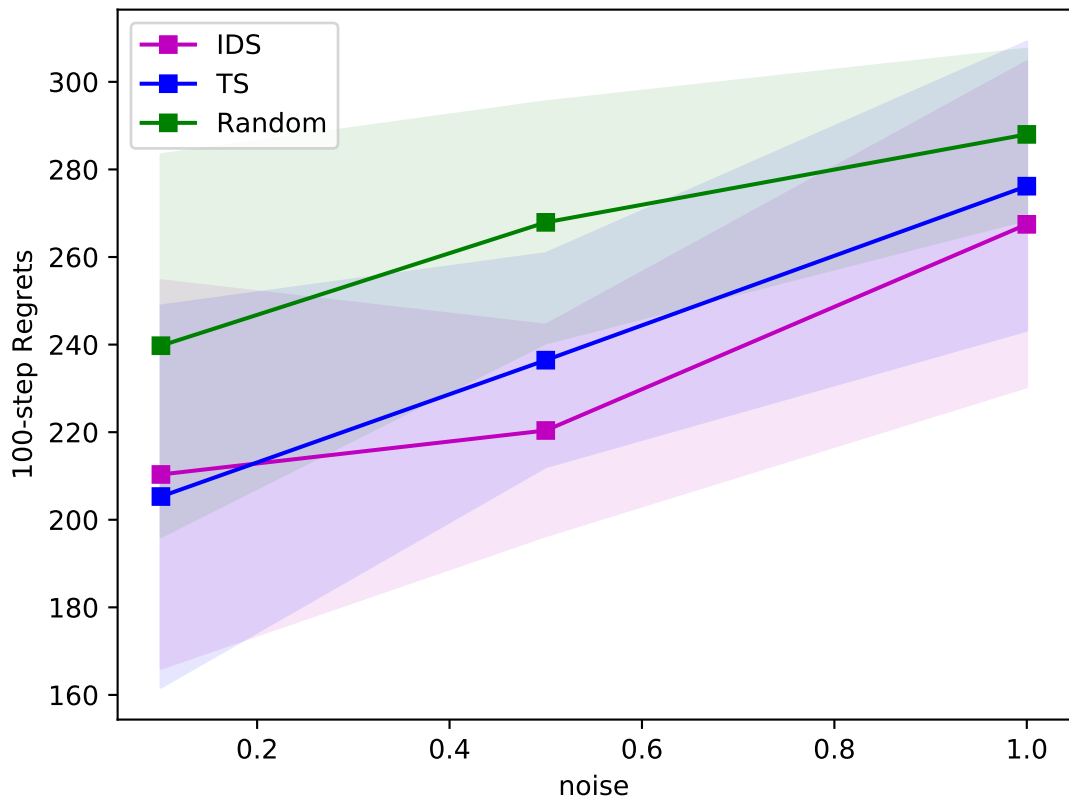

Supplement: Supplementary file 1 [file 07bc8125400bf4b140c332010756bd9b-Supplemental-Conference.zip › Code/selected_results/Matrix/IDS-Greedy-Random_vs_20220407-225753/IDS-Greedy-Random_vs_20220407-225753_summarized_labeled.pdf]

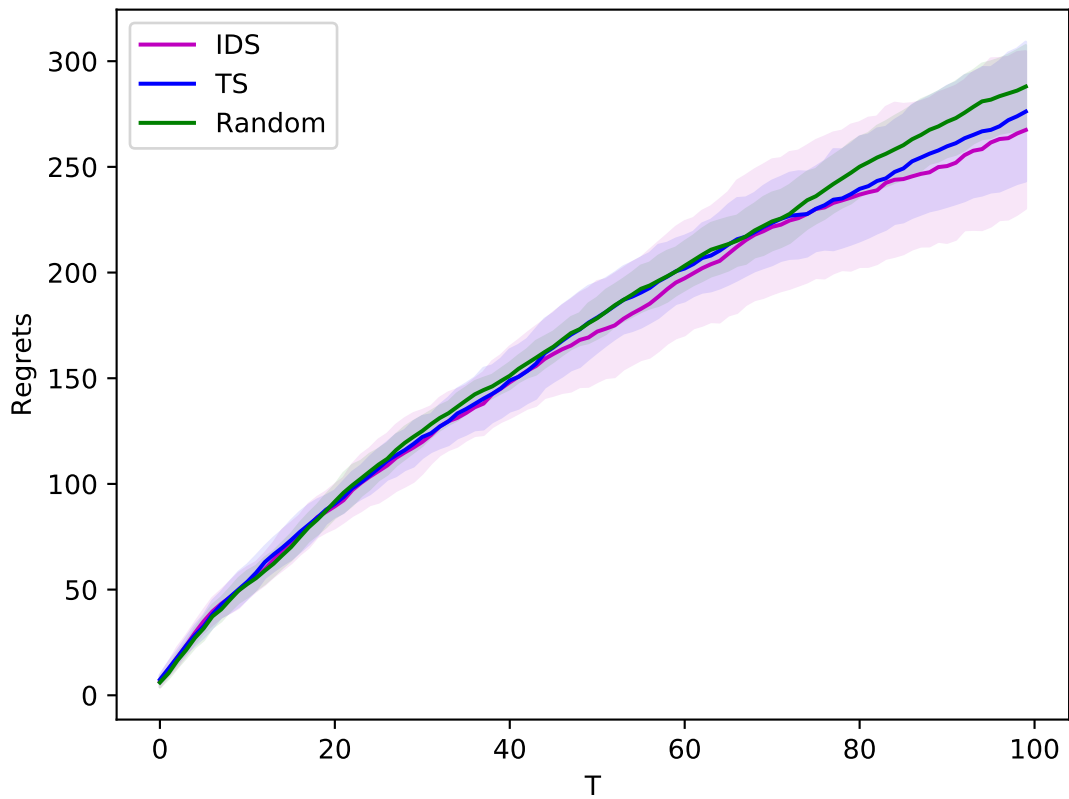

Supplement: Supplementary file 1 [file 07bc8125400bf4b140c332010756bd9b-Supplemental-Conference.zip › Code/selected_results/Matrix/IDS-Greedy-Random_vs_20220407-225753/IDS-Greedy-Random_vs_20220407-225753_2_labeled.pdf]

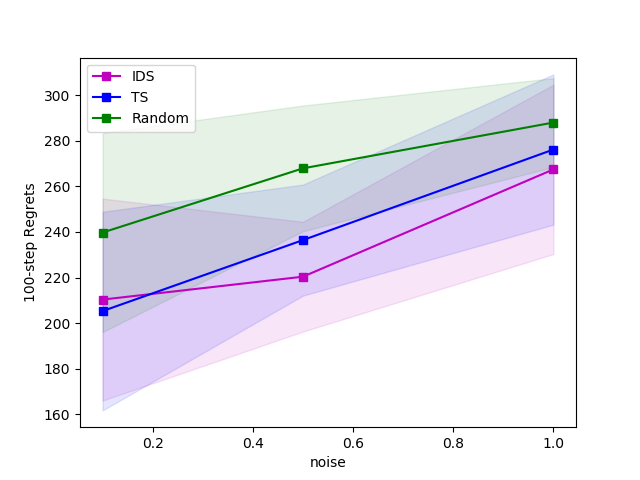

Supplement: Supplementary file 1 [file 07bc8125400bf4b140c332010756bd9b-Supplemental-Conference.zip › Code/selected_results/Matrix/IDS-Greedy-Random_vs_20220407-225753/IDS-Greedy-Random_vs_20220407-225753_summarized_labeled.png]

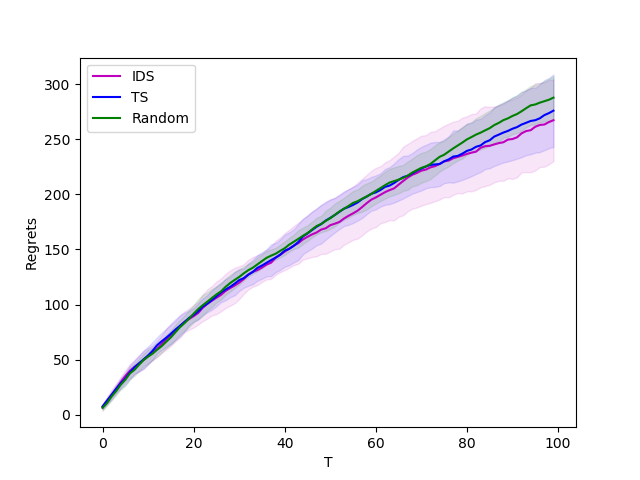

Supplement: Supplementary file 1 [file 07bc8125400bf4b140c332010756bd9b-Supplemental-Conference.zip › Code/selected_results/Matrix/IDS-Greedy-Random_vs_20220407-225753/IDS-Greedy-Random_vs_20220407-225753_2_labeled.png]

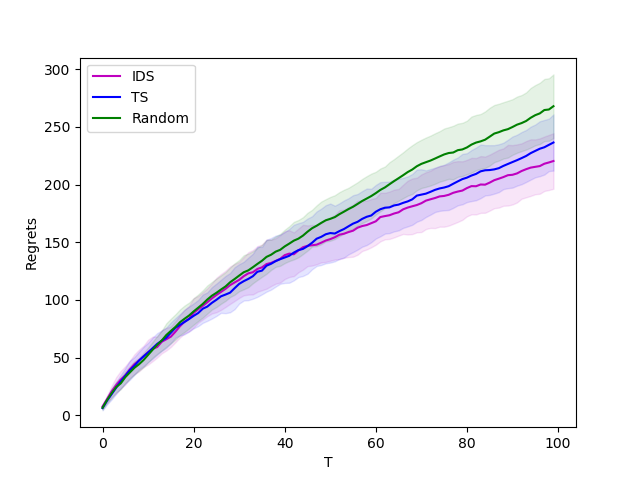

Supplement: Supplementary file 1 [file 07bc8125400bf4b140c332010756bd9b-Supplemental-Conference.zip › Code/selected_results/Matrix/IDS-Greedy-Random_vs_20220407-225753/IDS-Greedy-Random_vs_20220407-225753_1_labeled.png]

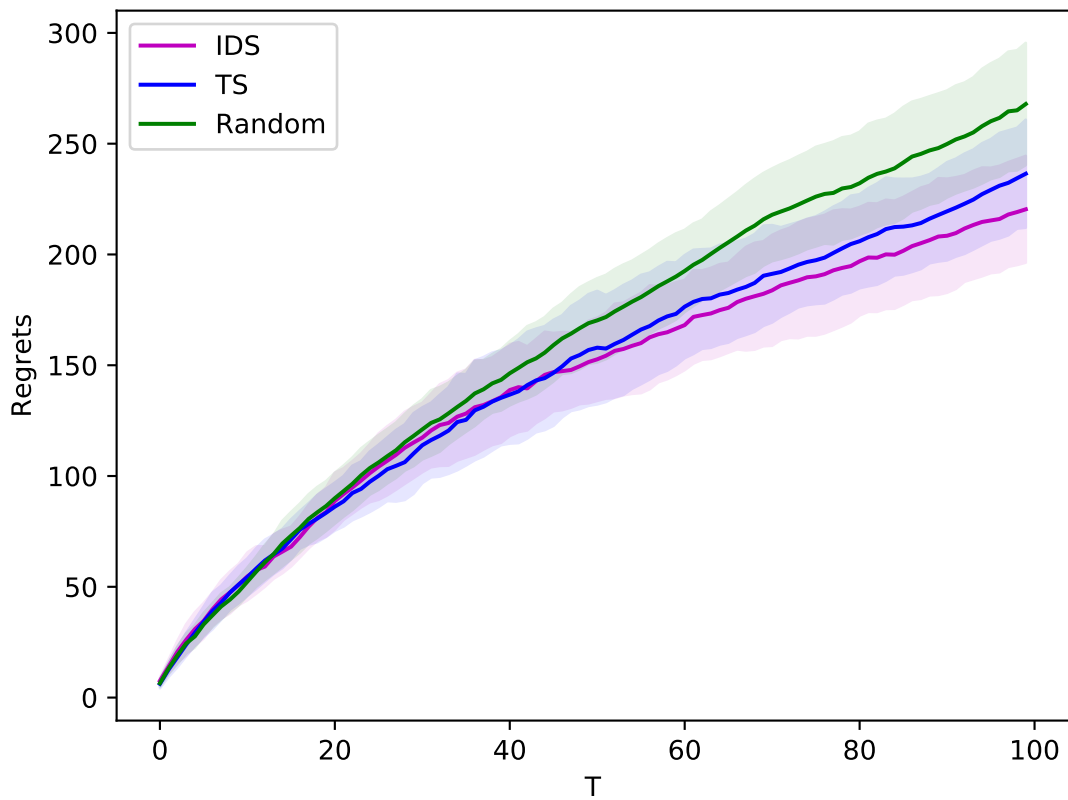

Supplement: Supplementary file 1 [file 07bc8125400bf4b140c332010756bd9b-Supplemental-Conference.zip › Code/selected_results/Matrix/IDS-Greedy-Random_vs_20220407-225753/IDS-Greedy-Random_vs_20220407-225753_1_labeled.pdf]

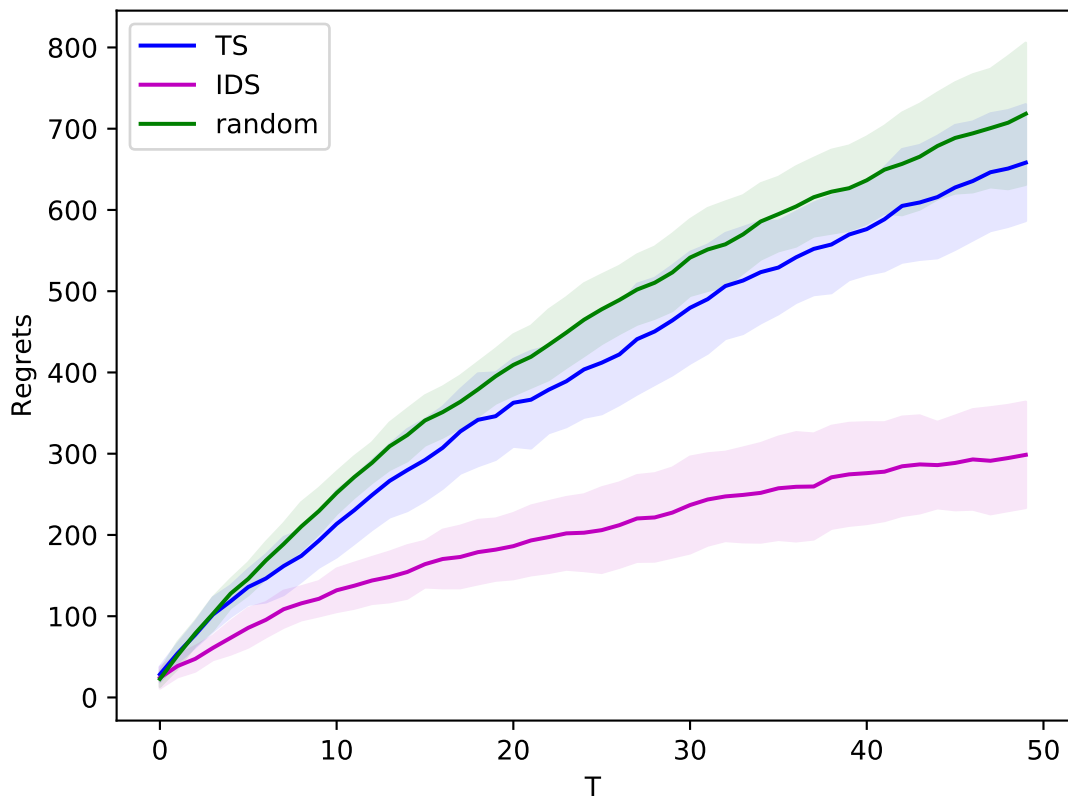

Supplement: Supplementary file 1 [file 07bc8125400bf4b140c332010756bd9b-Supplemental-Conference.zip › Code/selected_results/Graph_random/TS-IDS-Random_vs_20220406-180320/TS-IDS-Random_vs_20220406-180320_0_labeled.pdf]

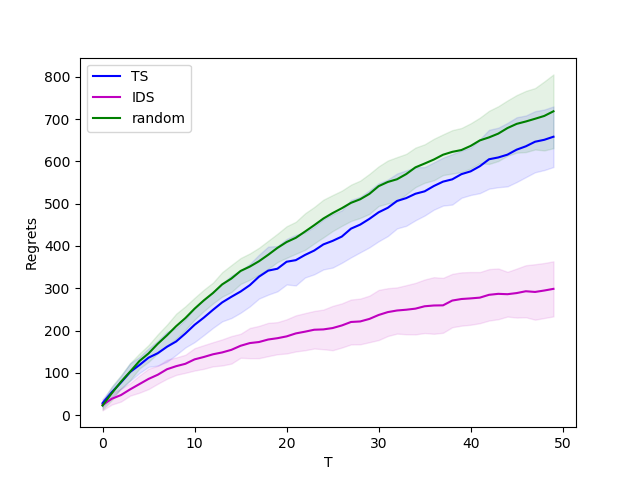

Supplement: Supplementary file 1 [file 07bc8125400bf4b140c332010756bd9b-Supplemental-Conference.zip › Code/selected_results/Graph_random/TS-IDS-Random_vs_20220406-180320/TS-IDS-Random_vs_20220406-180320_0_labeled.png]

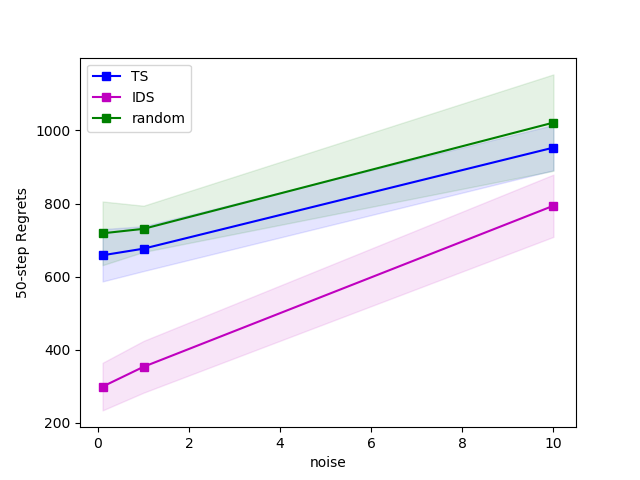

Supplement: Supplementary file 1 [file 07bc8125400bf4b140c332010756bd9b-Supplemental-Conference.zip › Code/selected_results/Graph_random/TS-IDS-Random_vs_20220406-180320/TS-IDS-Random_vs_20220406-180320_summarized_labeled.png]

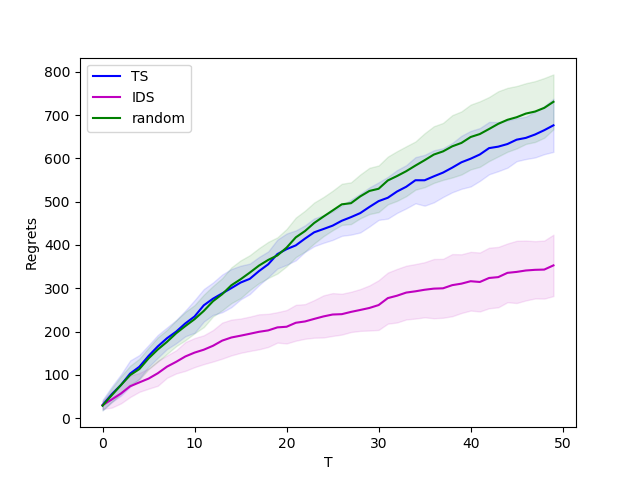

Supplement: Supplementary file 1 [file 07bc8125400bf4b140c332010756bd9b-Supplemental-Conference.zip › Code/selected_results/Graph_random/TS-IDS-Random_vs_20220406-180320/TS-IDS-Random_vs_20220406-180320_1_labeled.png]

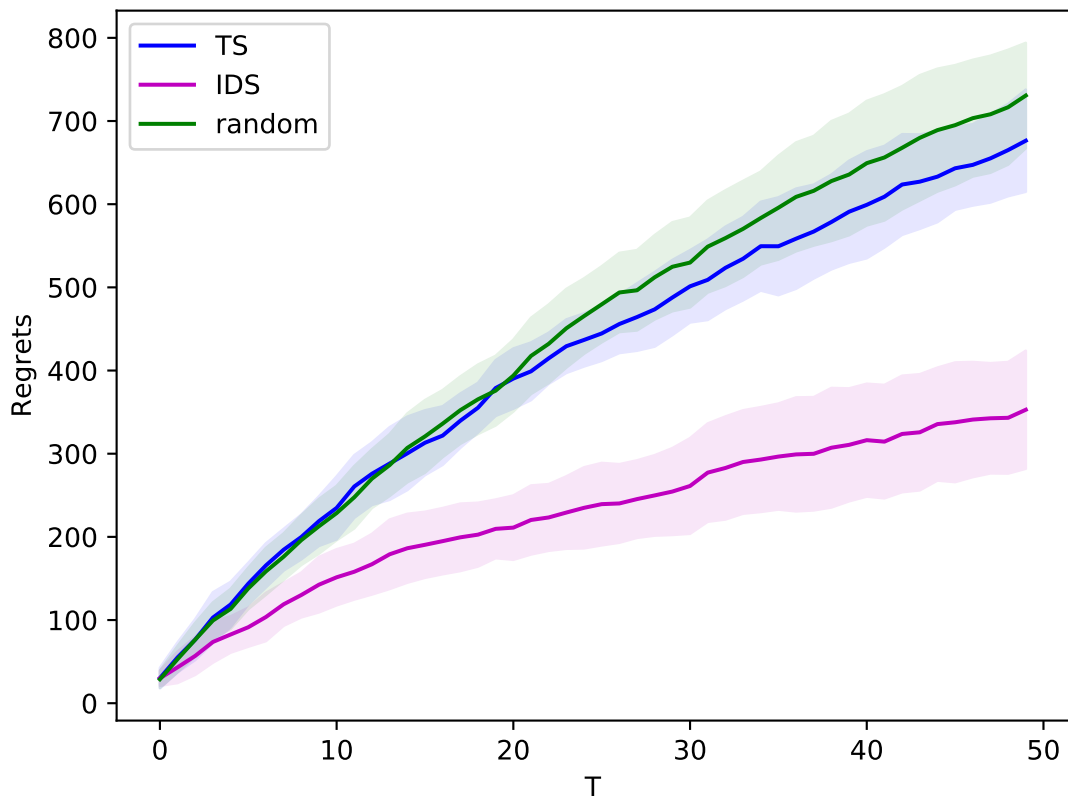

Supplement: Supplementary file 1 [file 07bc8125400bf4b140c332010756bd9b-Supplemental-Conference.zip › Code/selected_results/Graph_random/TS-IDS-Random_vs_20220406-180320/TS-IDS-Random_vs_20220406-180320_1_labeled.pdf]

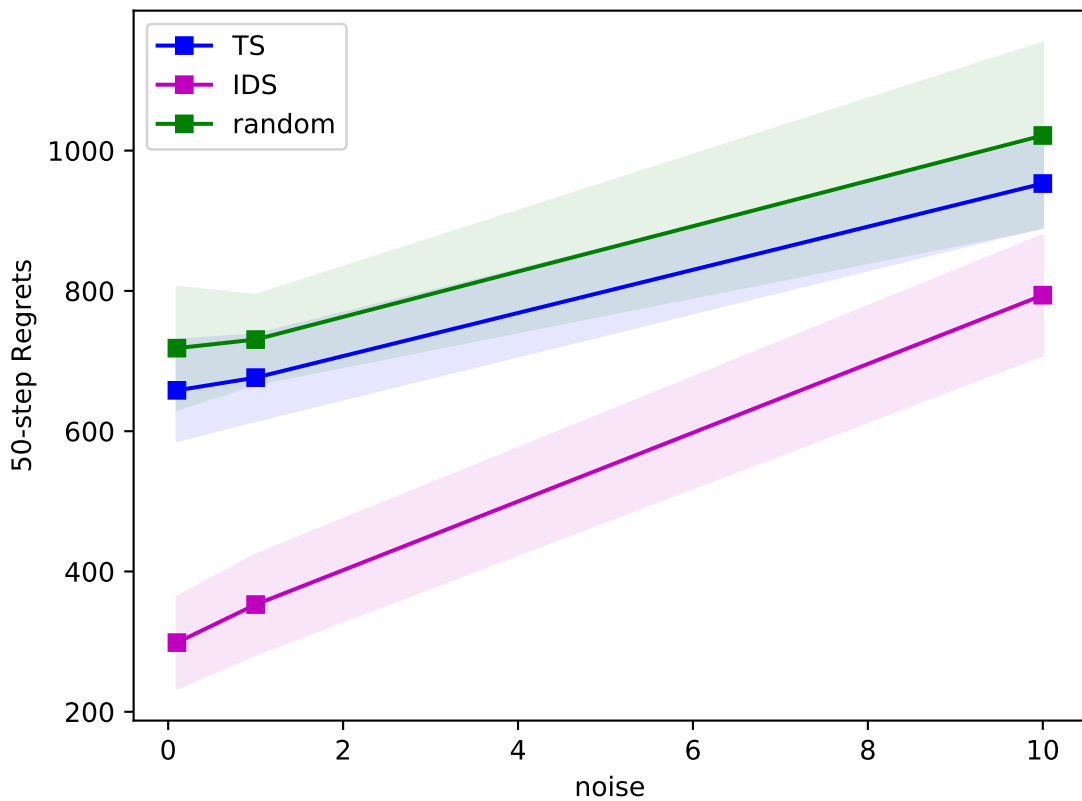

Supplement: Supplementary file 1 [file 07bc8125400bf4b140c332010756bd9b-Supplemental-Conference.zip › Code/selected_results/Graph_random/TS-IDS-Random_vs_20220406-180320/TS-IDS-Random_vs_20220406-180320_summarized_labeled.pdf]

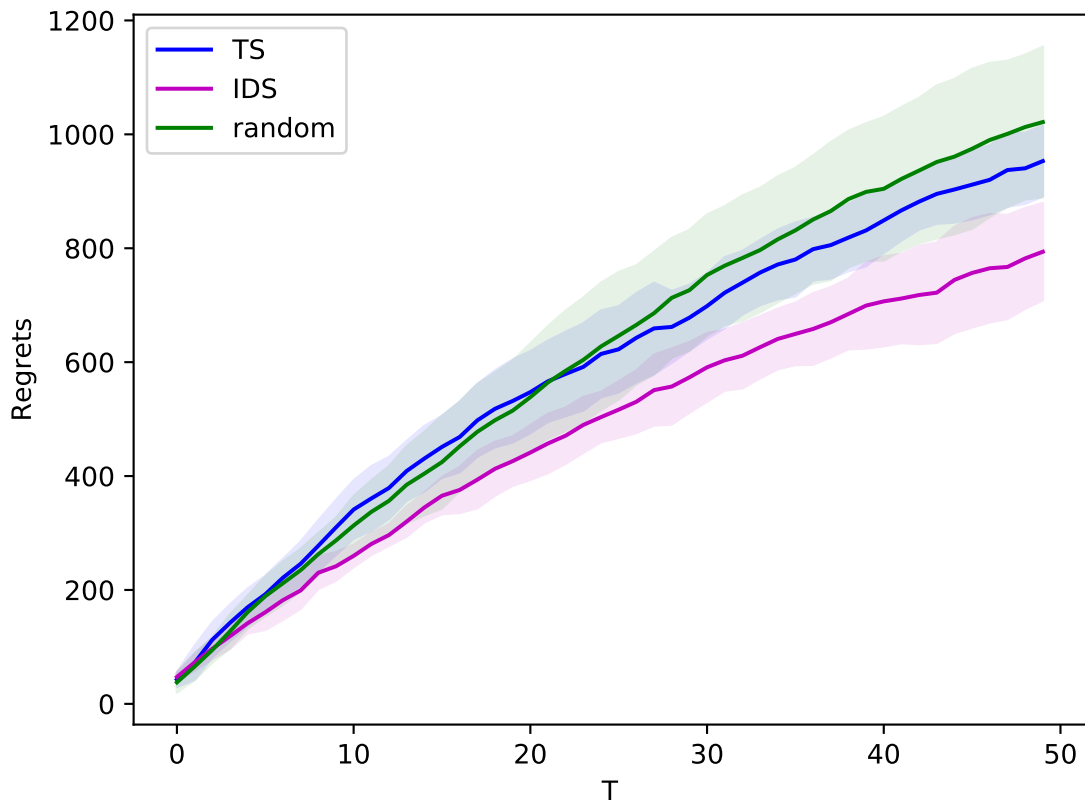

Supplement: Supplementary file 1 [file 07bc8125400bf4b140c332010756bd9b-Supplemental-Conference.zip › Code/selected_results/Graph_random/TS-IDS-Random_vs_20220406-180320/TS-IDS-Random_vs_20220406-180320_2_labeled.pdf]

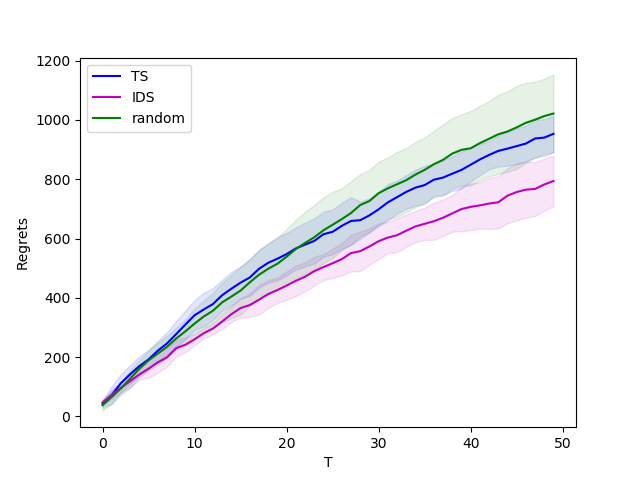

Supplement: Supplementary file 1 [file 07bc8125400bf4b140c332010756bd9b-Supplemental-Conference.zip › Code/selected_results/Graph_random/TS-IDS-Random_vs_20220406-180320/TS-IDS-Random_vs_20220406-180320_2_labeled.png]

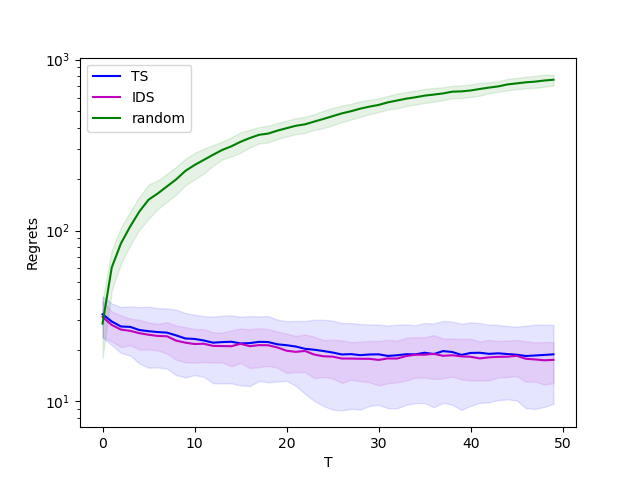

Supplement: Supplementary file 1 [file 07bc8125400bf4b140c332010756bd9b-Supplemental-Conference.zip › Code/selected_results/Graph_complete/TS-IDS-Random_vs_20220406-175808/TS-IDS-Random_vs_20220406-175808_1_labeled.png]

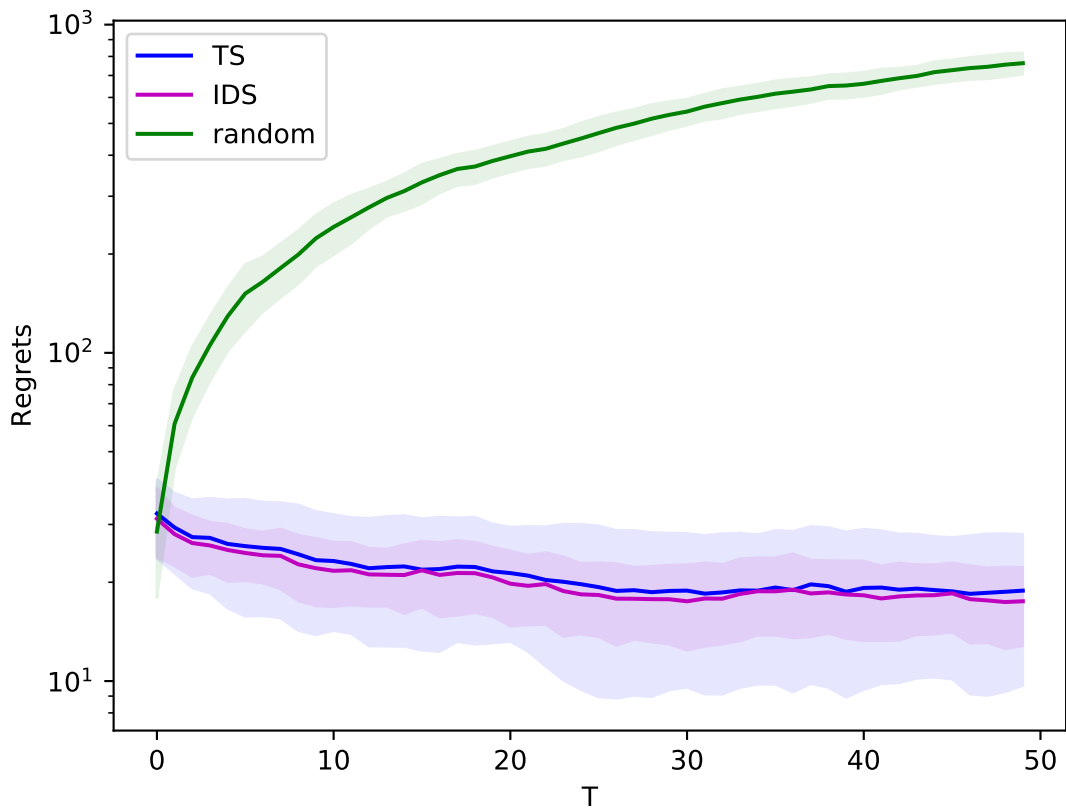

Supplement: Supplementary file 1 [file 07bc8125400bf4b140c332010756bd9b-Supplemental-Conference.zip › Code/selected_results/Graph_complete/TS-IDS-Random_vs_20220406-175808/TS-IDS-Random_vs_20220406-175808_1_labeled.pdf]

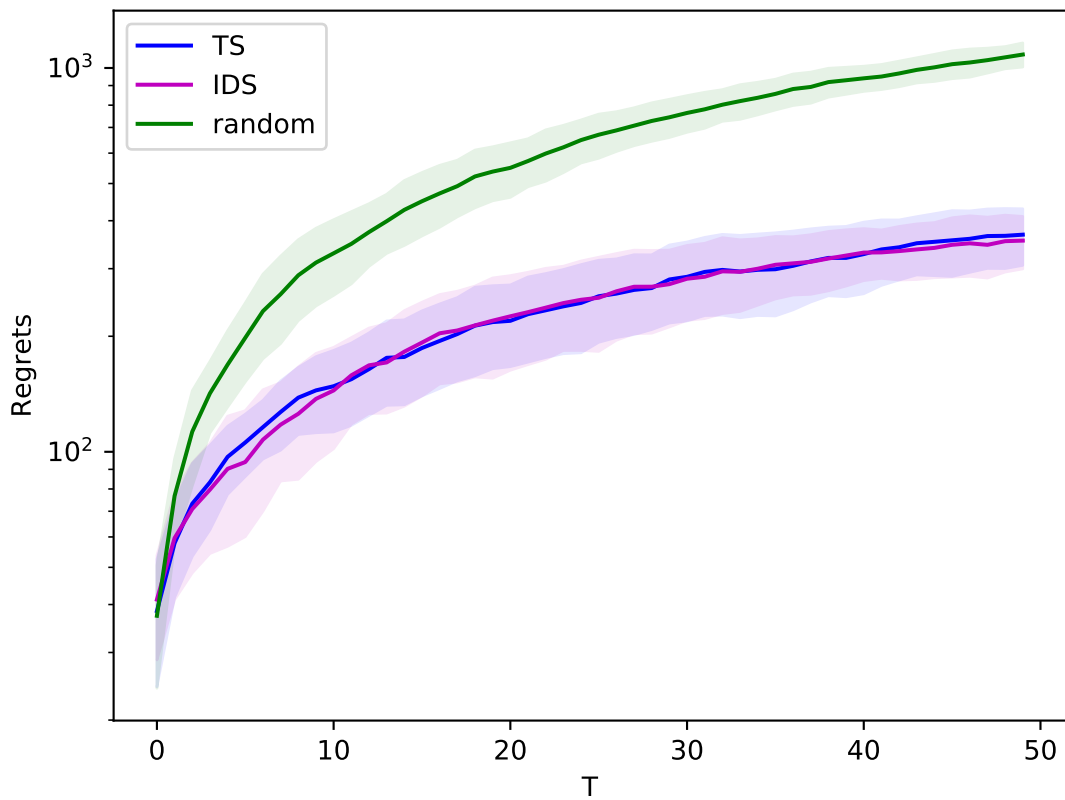

Supplement: Supplementary file 1 [file 07bc8125400bf4b140c332010756bd9b-Supplemental-Conference.zip › Code/selected_results/Graph_complete/TS-IDS-Random_vs_20220406-175808/TS-IDS-Random_vs_20220406-175808_2_labeled.pdf]

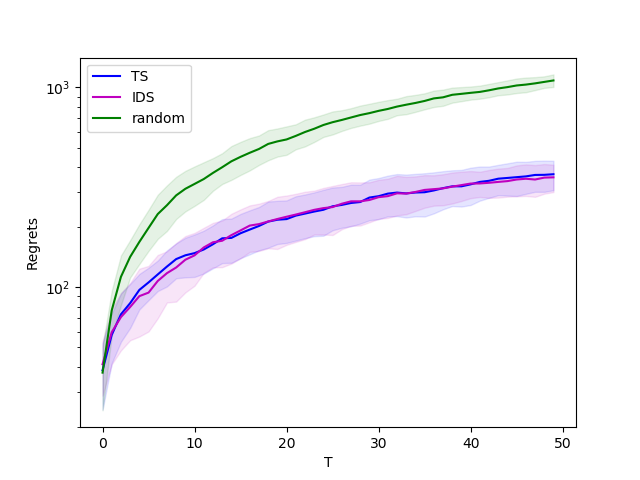

Supplement: Supplementary file 1 [file 07bc8125400bf4b140c332010756bd9b-Supplemental-Conference.zip › Code/selected_results/Graph_complete/TS-IDS-Random_vs_20220406-175808/TS-IDS-Random_vs_20220406-175808_2_labeled.png]

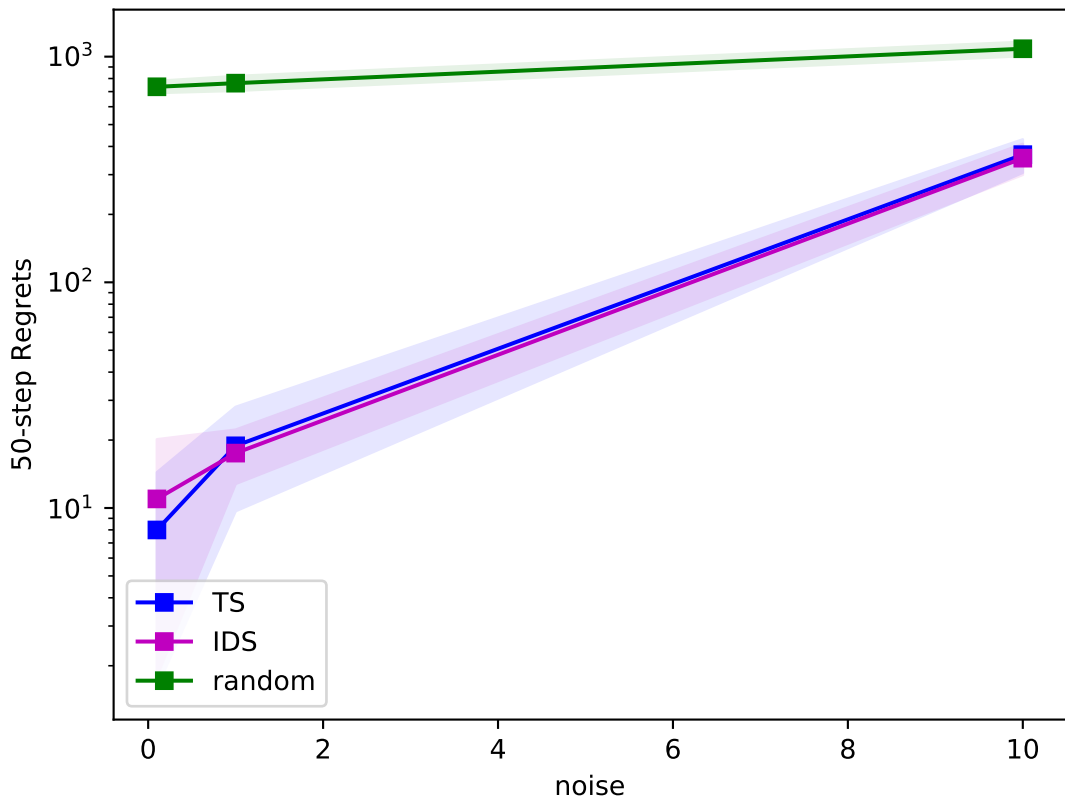

Supplement: Supplementary file 1 [file 07bc8125400bf4b140c332010756bd9b-Supplemental-Conference.zip › Code/selected_results/Graph_complete/TS-IDS-Random_vs_20220406-175808/TS-IDS-Random_vs_20220406-175808_summarized_labeled.pdf]

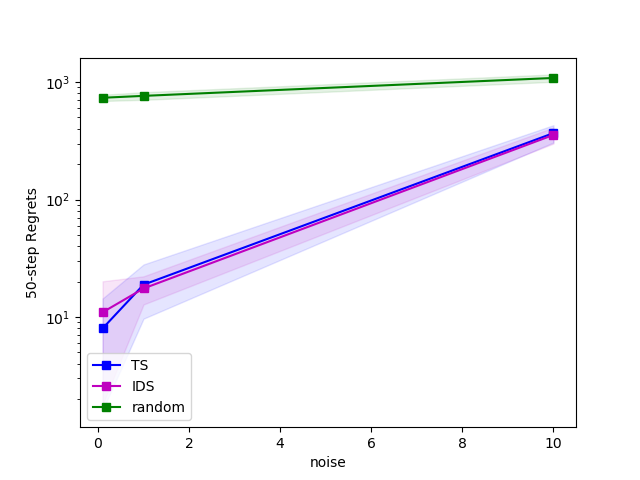

Supplement: Supplementary file 1 [file 07bc8125400bf4b140c332010756bd9b-Supplemental-Conference.zip › Code/selected_results/Graph_complete/TS-IDS-Random_vs_20220406-175808/TS-IDS-Random_vs_20220406-175808_summarized_labeled.png]

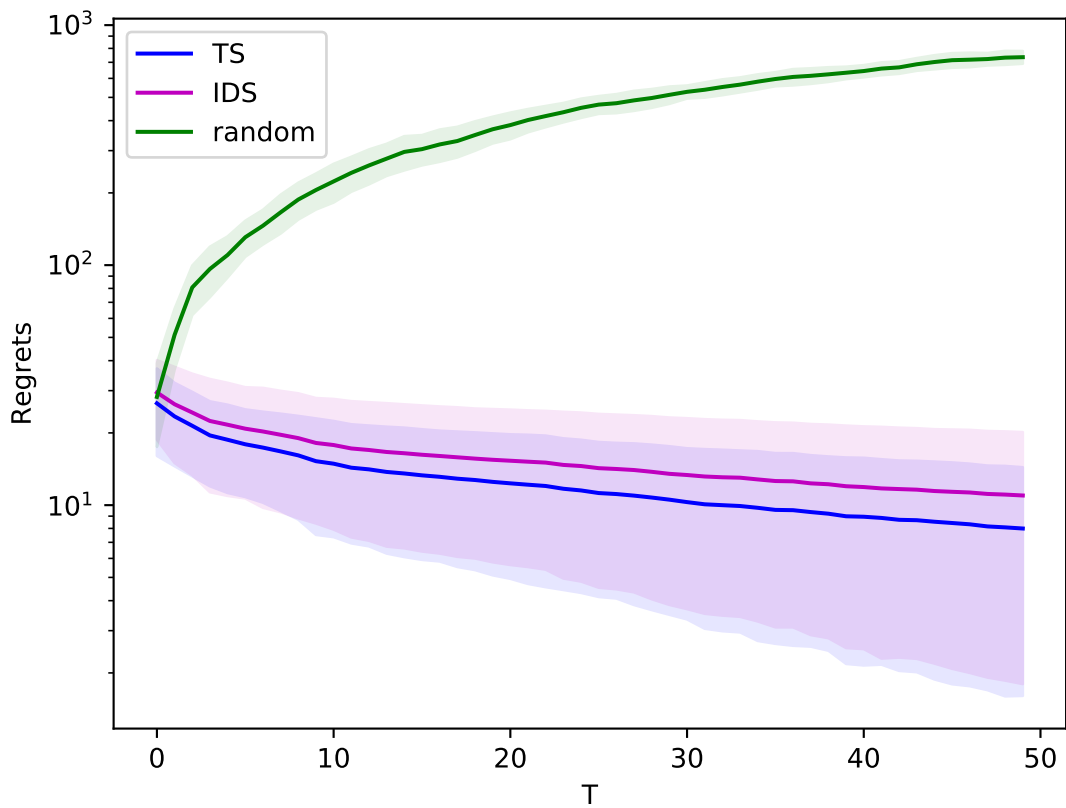

Supplement: Supplementary file 1 [file 07bc8125400bf4b140c332010756bd9b-Supplemental-Conference.zip › Code/selected_results/Graph_complete/TS-IDS-Random_vs_20220406-175808/TS-IDS-Random_vs_20220406-175808_0_labeled.pdf]

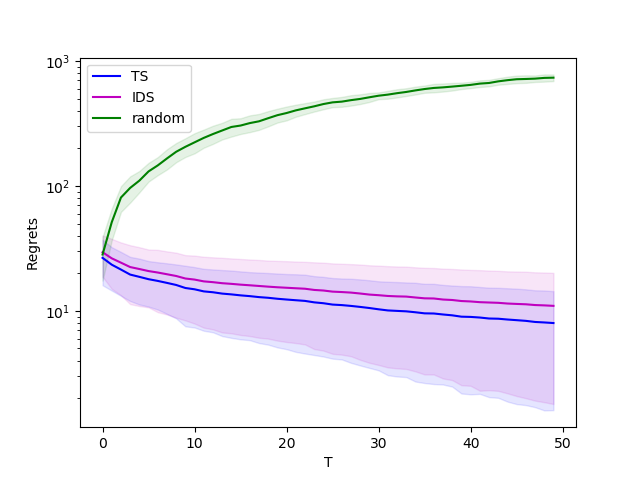

Supplement: Supplementary file 1 [file 07bc8125400bf4b140c332010756bd9b-Supplemental-Conference.zip › Code/selected_results/Graph_complete/TS-IDS-Random_vs_20220406-175808/TS-IDS-Random_vs_20220406-175808_0_labeled.png]
