# Supplementary material (part 1 of 2)
Source: ML conference proceedings conference paper supplement (https://proceedings.neurips.cc/paper_files/paper/2022/hash/07bc8125400bf4b140c332010756bd9b-Abstract.html)

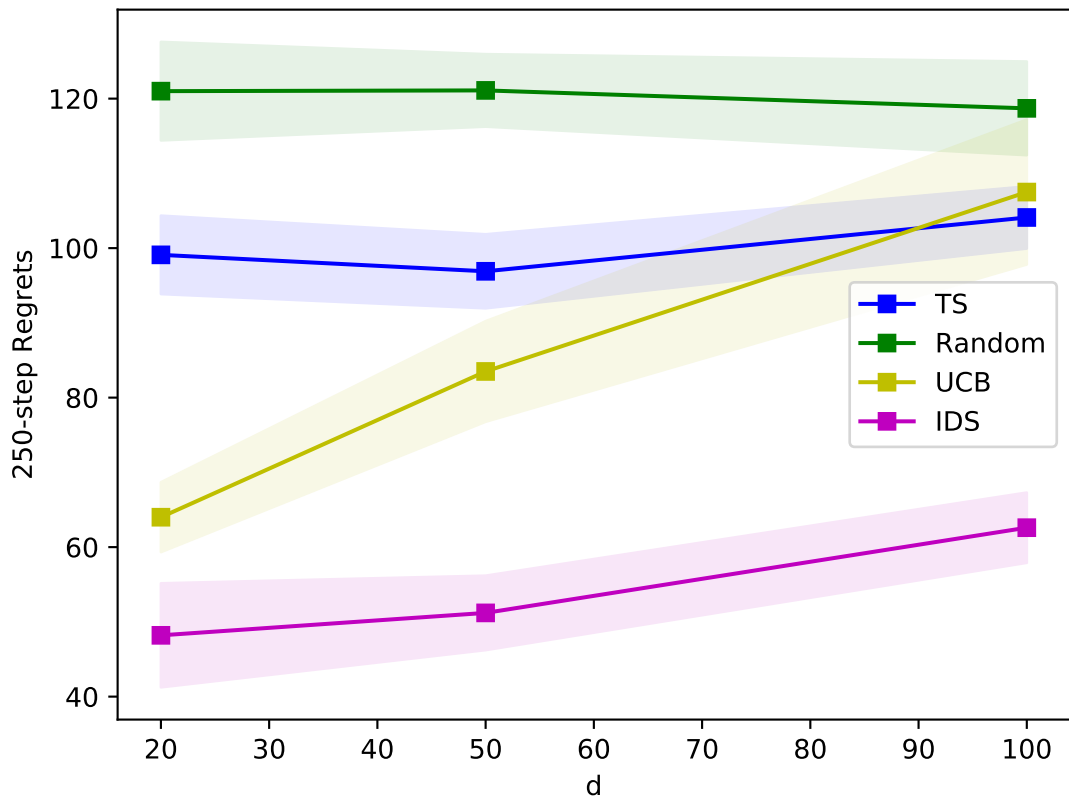

Supplement: Supplementary file 1 [file 07bc8125400bf4b140c332010756bd9b-Supplemental-Conference.zip › Code/selected_results/Logistic/Summary.pdf]

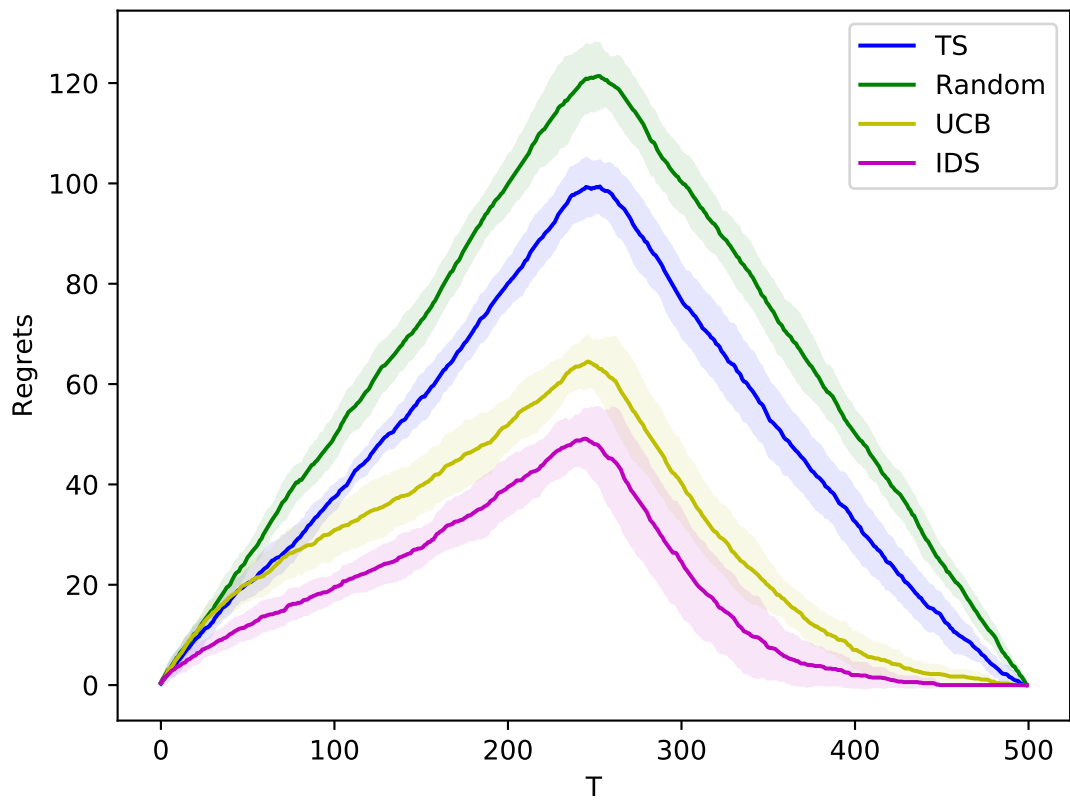

Supplement: Supplementary file 1 [file 07bc8125400bf4b140c332010756bd9b-Supplemental-Conference.zip › Code/selected_results/Logistic/1.pdf]

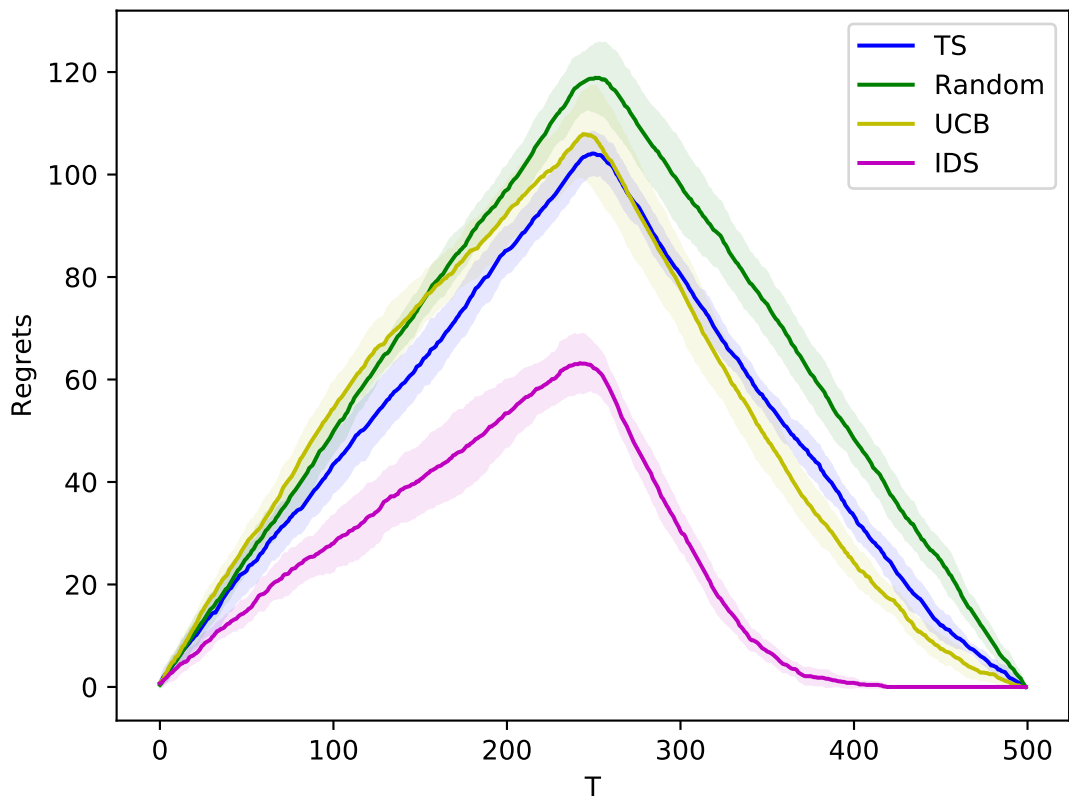

Supplement: Supplementary file 1 [file 07bc8125400bf4b140c332010756bd9b-Supplemental-Conference.zip › Code/selected_results/Logistic/3.pdf]

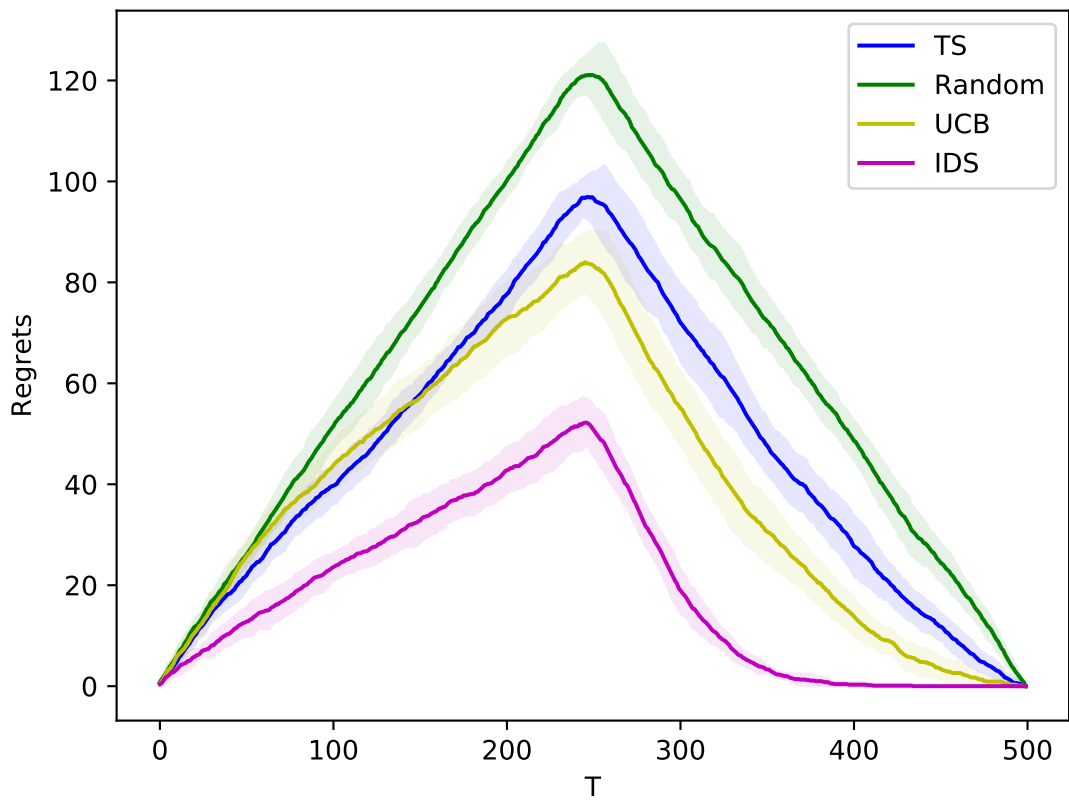

Supplement: Supplementary file 1 [file 07bc8125400bf4b140c332010756bd9b-Supplemental-Conference.zip › Code/selected_results/Logistic/2.pdf]

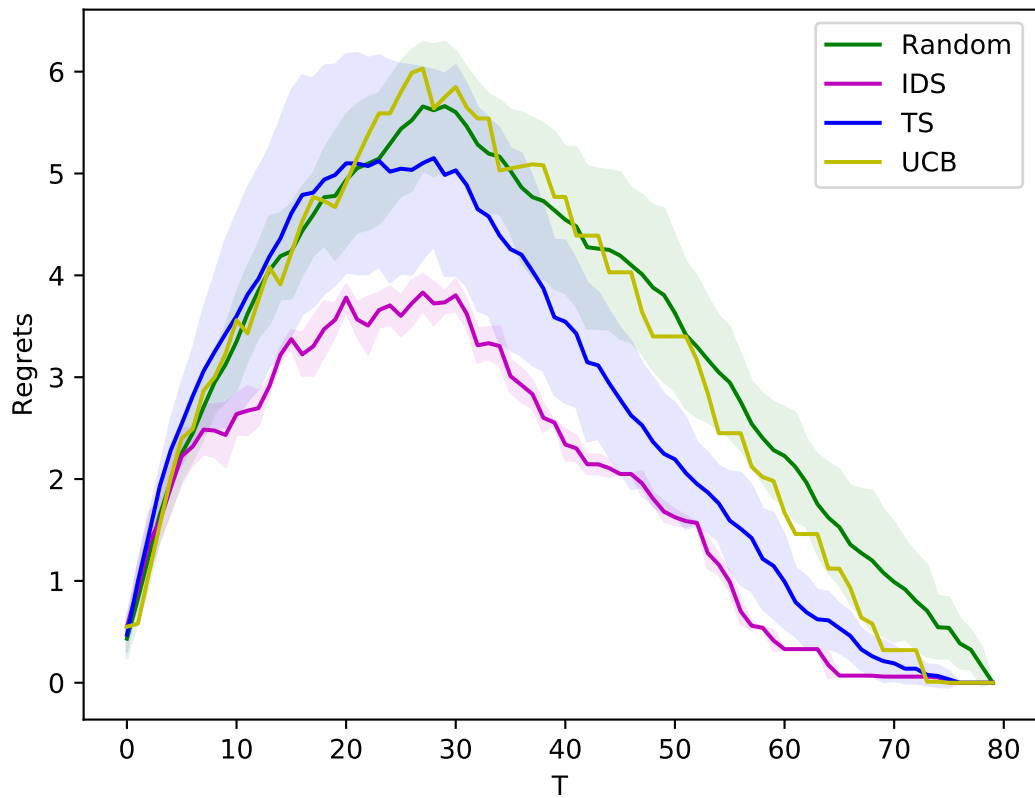

Supplement: Supplementary file 1 [file 07bc8125400bf4b140c332010756bd9b-Supplemental-Conference.zip › Code/selected_results/CNCCI/9.pdf]

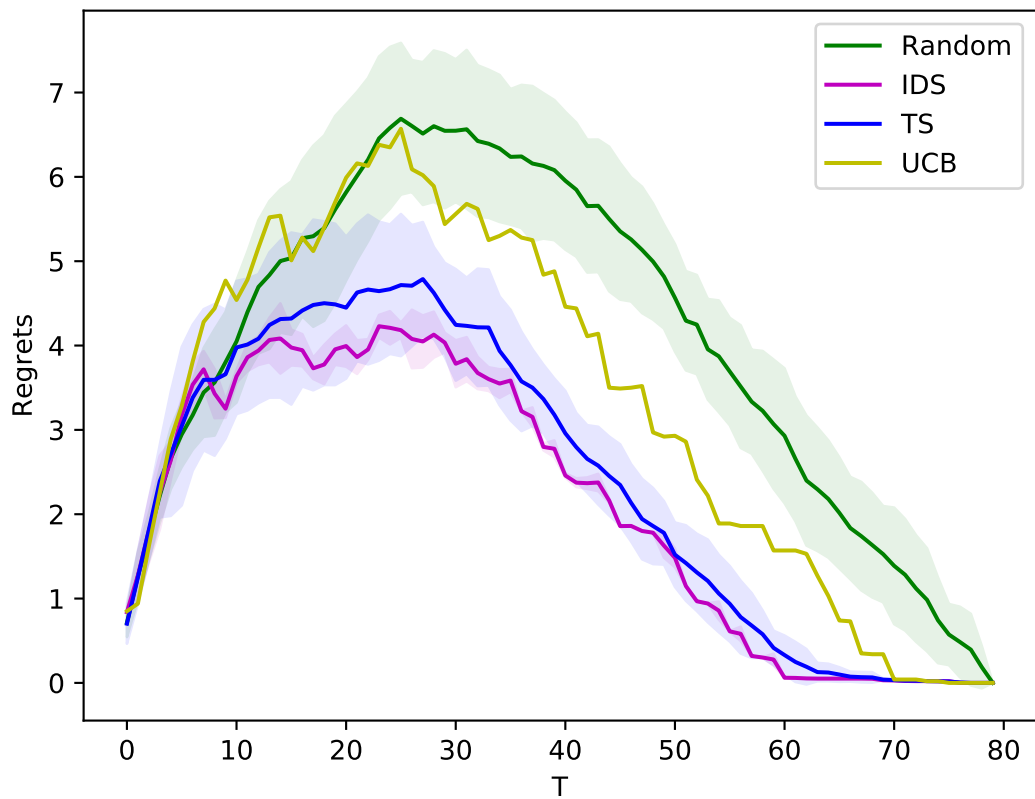

Supplement: Supplementary file 1 [file 07bc8125400bf4b140c332010756bd9b-Supplemental-Conference.zip › Code/selected_results/CNCCI/8.pdf]

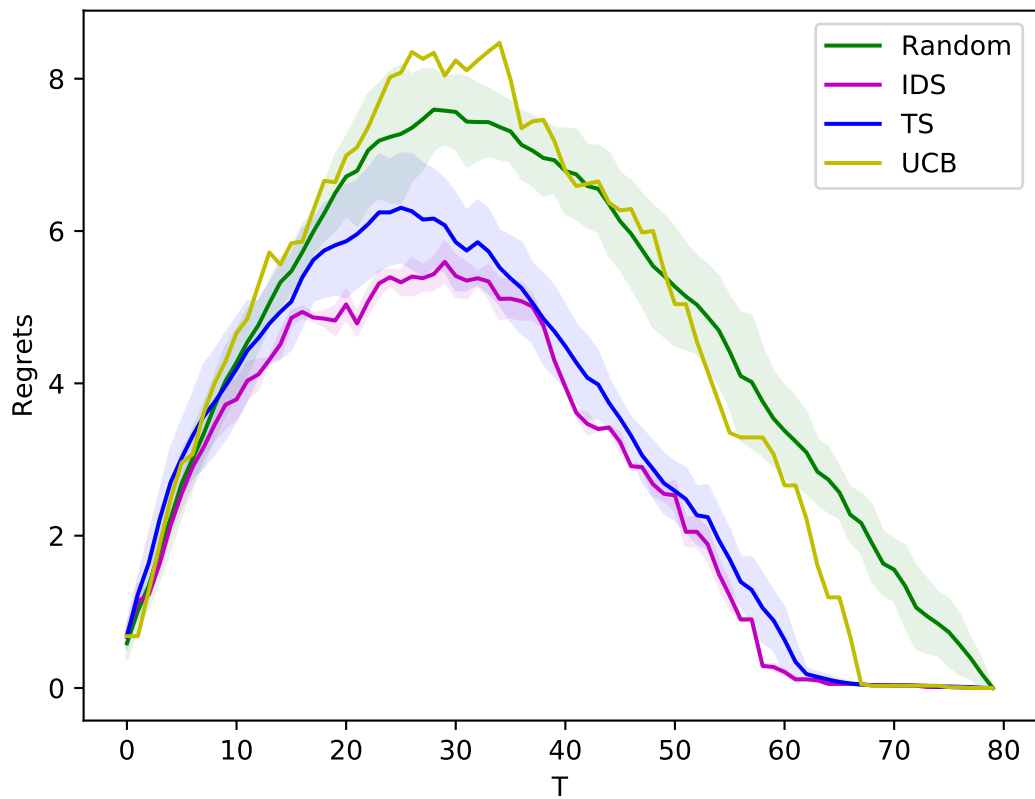

Supplement: Supplementary file 1 [file 07bc8125400bf4b140c332010756bd9b-Supplemental-Conference.zip › Code/selected_results/CNCCI/10.pdf]

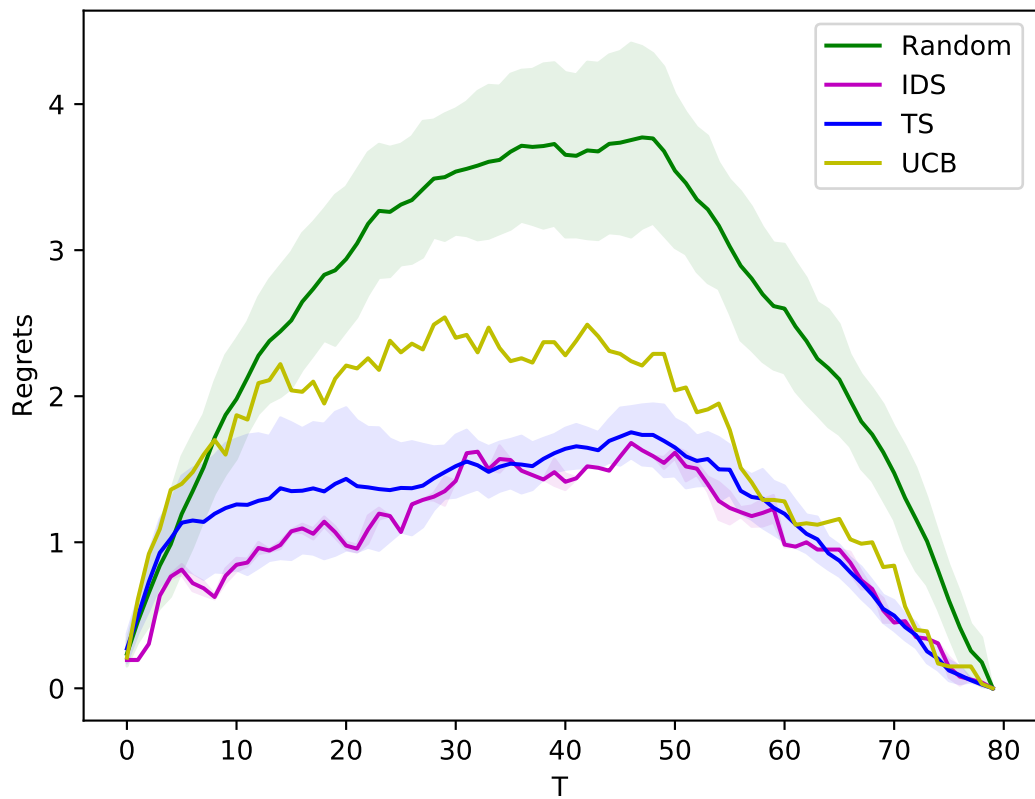

Supplement: Supplementary file 1 [file 07bc8125400bf4b140c332010756bd9b-Supplemental-Conference.zip › Code/selected_results/CNCCI/11.pdf]

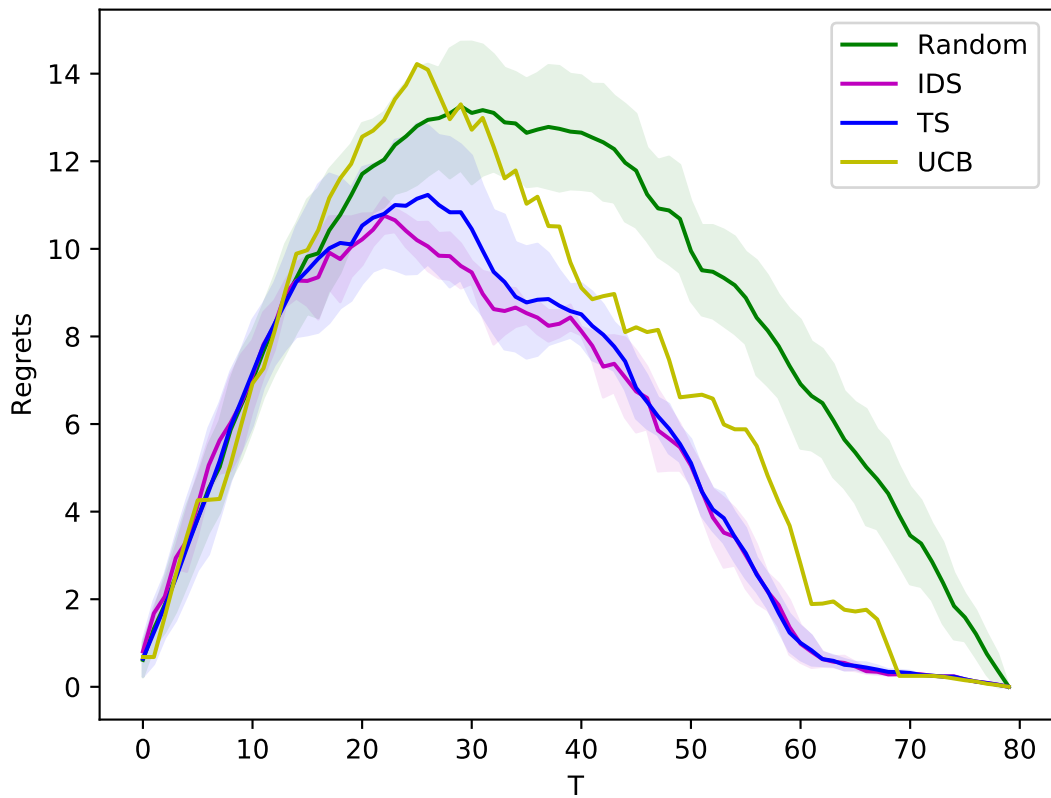

Supplement: Supplementary file 1 [file 07bc8125400bf4b140c332010756bd9b-Supplemental-Conference.zip › Code/selected_results/CNCCI/6.pdf]

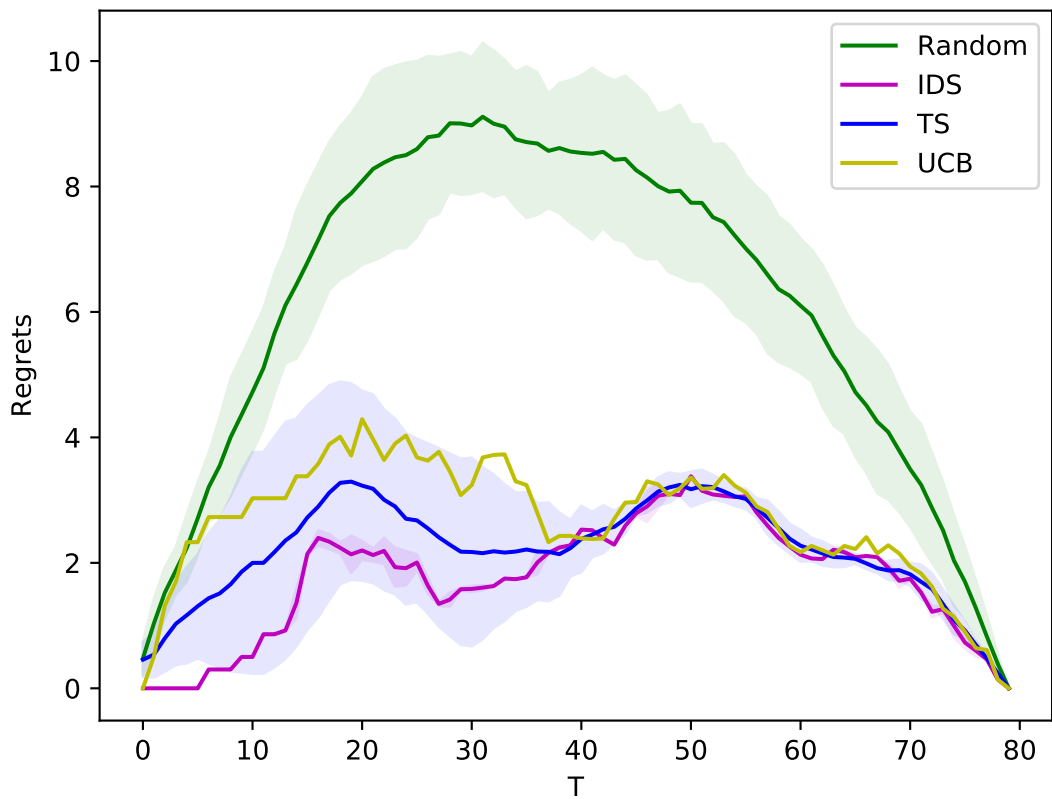

Supplement: Supplementary file 1 [file 07bc8125400bf4b140c332010756bd9b-Supplemental-Conference.zip › Code/selected_results/CNCCI/7.pdf]

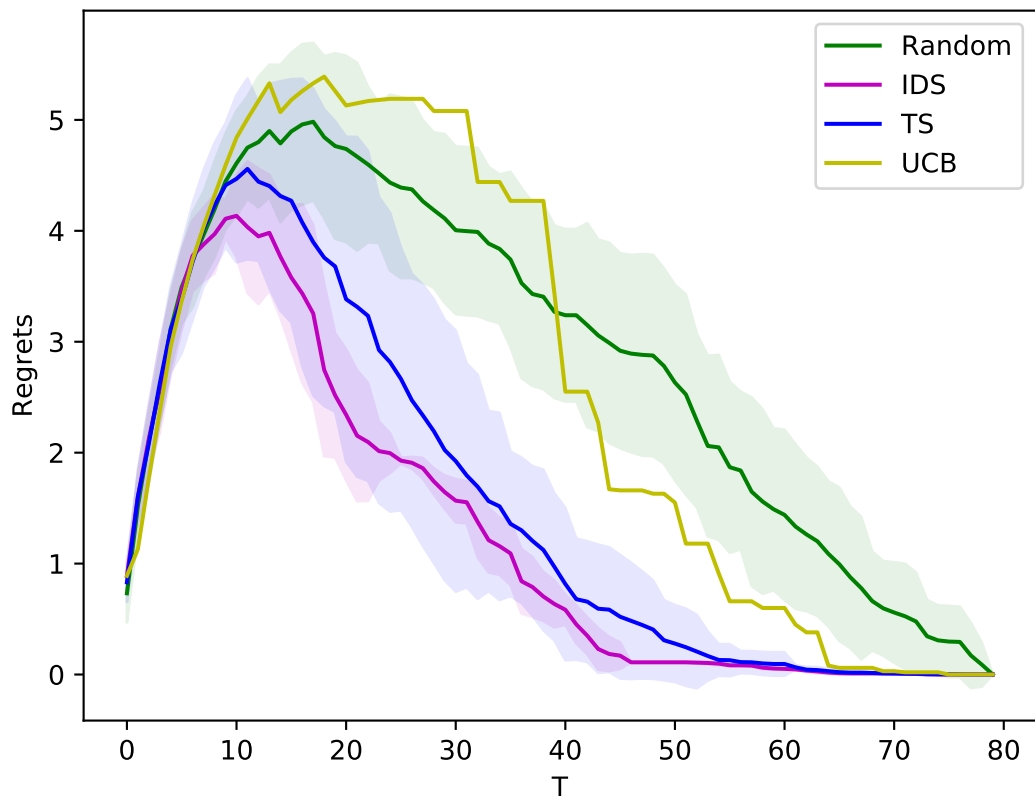

Supplement: Supplementary file 1 [file 07bc8125400bf4b140c332010756bd9b-Supplemental-Conference.zip › Code/selected_results/CNCCI/5.pdf]

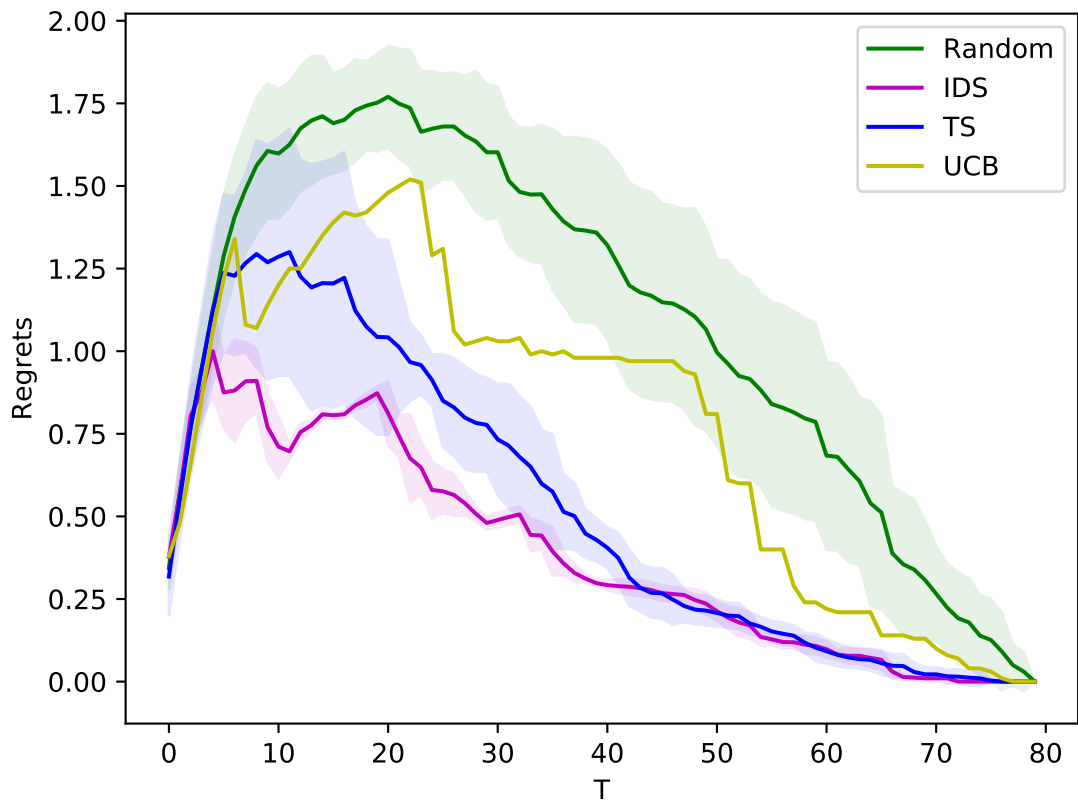

Supplement: Supplementary file 1 [file 07bc8125400bf4b140c332010756bd9b-Supplemental-Conference.zip › Code/selected_results/CNCCI/4.pdf]

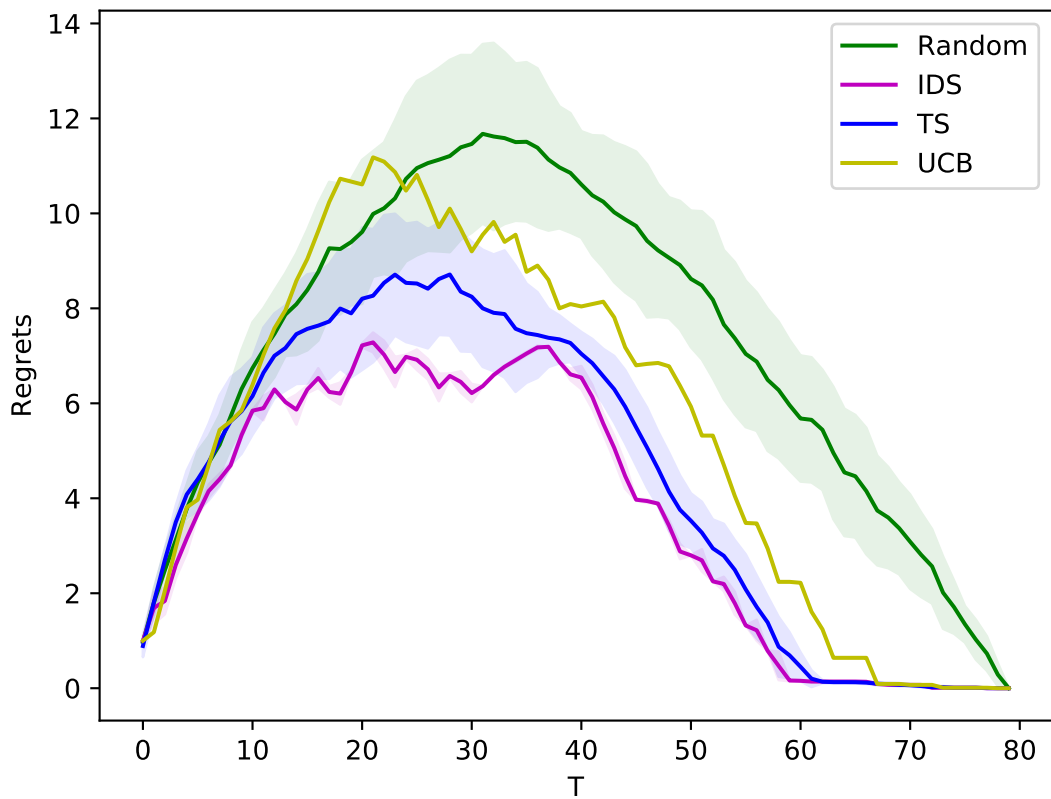

Supplement: Supplementary file 1 [file 07bc8125400bf4b140c332010756bd9b-Supplemental-Conference.zip › Code/selected_results/CNCCI/1.pdf]

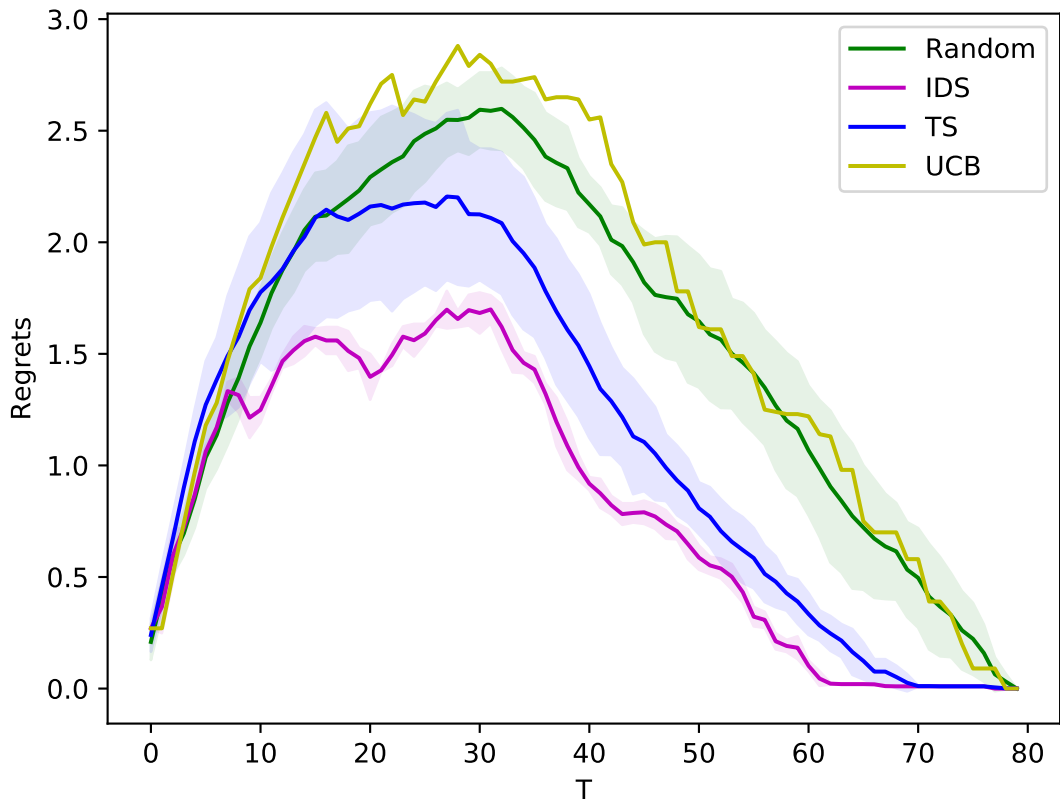

Supplement: Supplementary file 1 [file 07bc8125400bf4b140c332010756bd9b-Supplemental-Conference.zip › Code/selected_results/CNCCI/3.pdf]

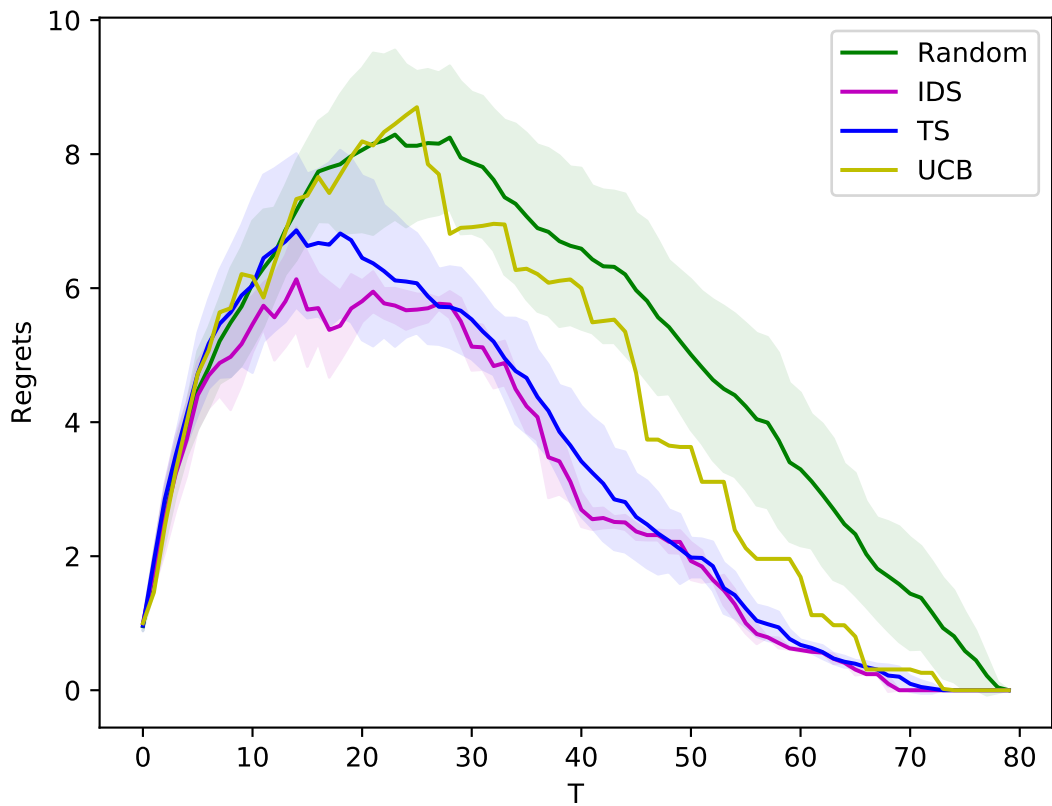

Supplement: Supplementary file 1 [file 07bc8125400bf4b140c332010756bd9b-Supplemental-Conference.zip › Code/selected_results/CNCCI/2.pdf]

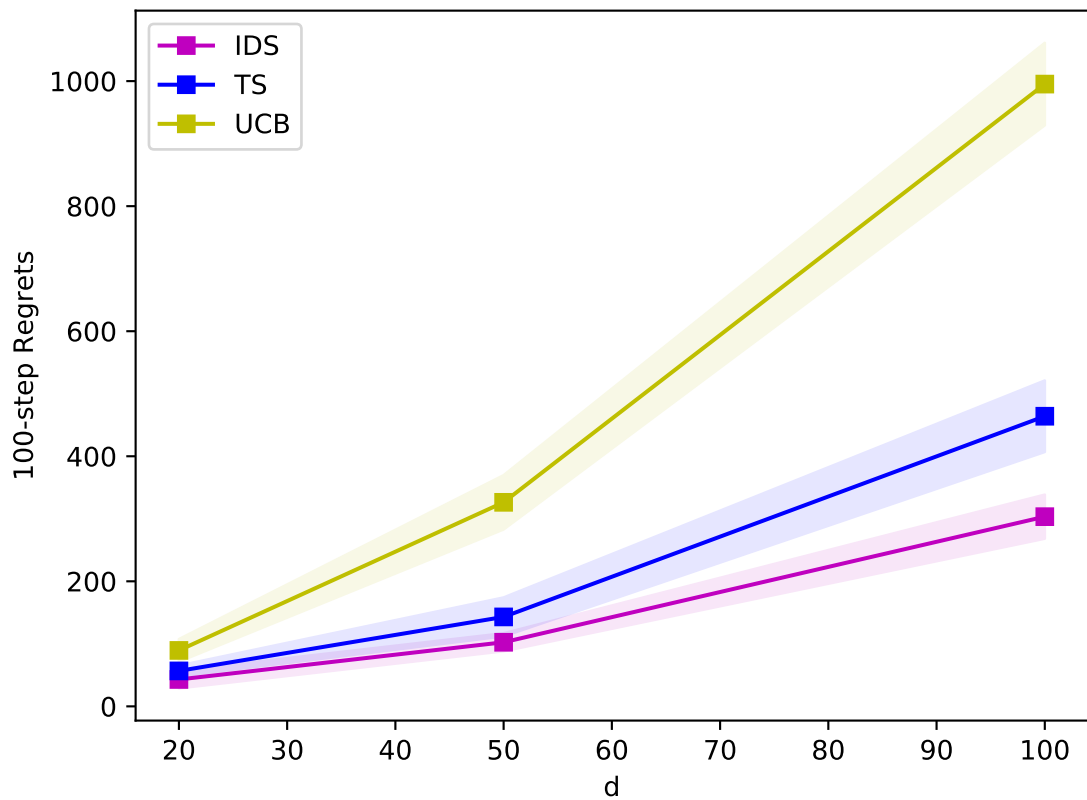

Supplement: Supplementary file 1 [file 07bc8125400bf4b140c332010756bd9b-Supplemental-Conference.zip › Code/selected_results/Linear/Summary.pdf]

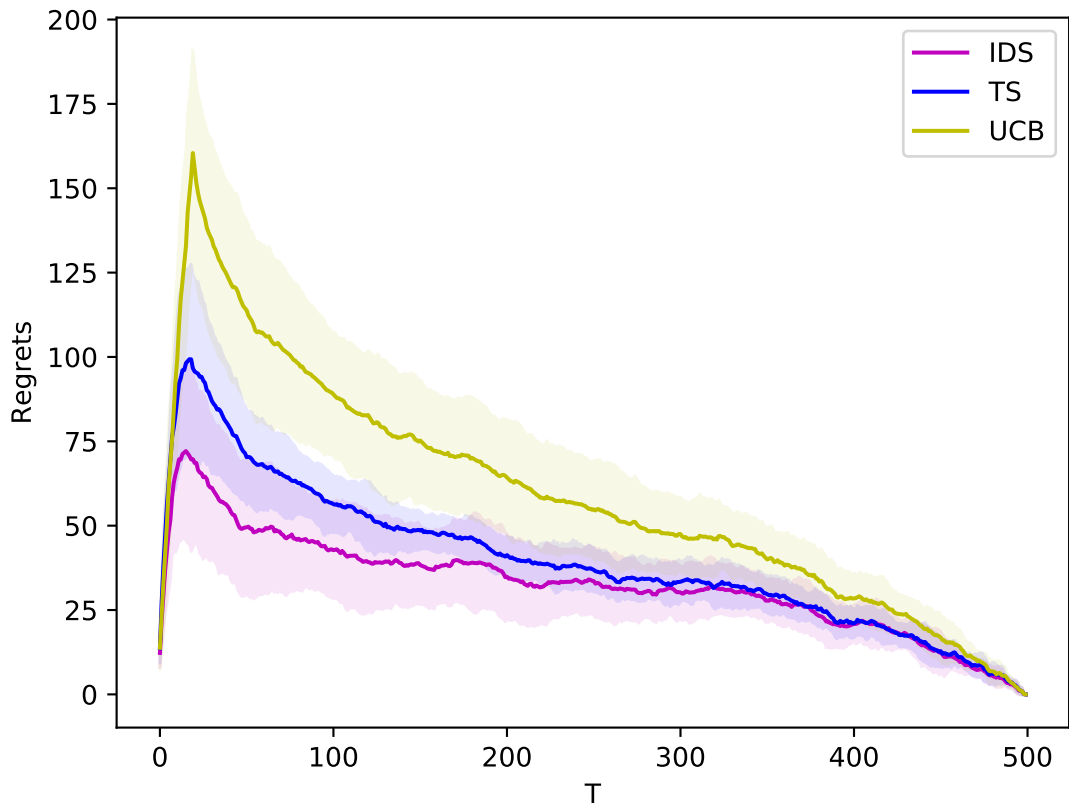

Supplement: Supplementary file 1 [file 07bc8125400bf4b140c332010756bd9b-Supplemental-Conference.zip › Code/selected_results/Linear/1.pdf]

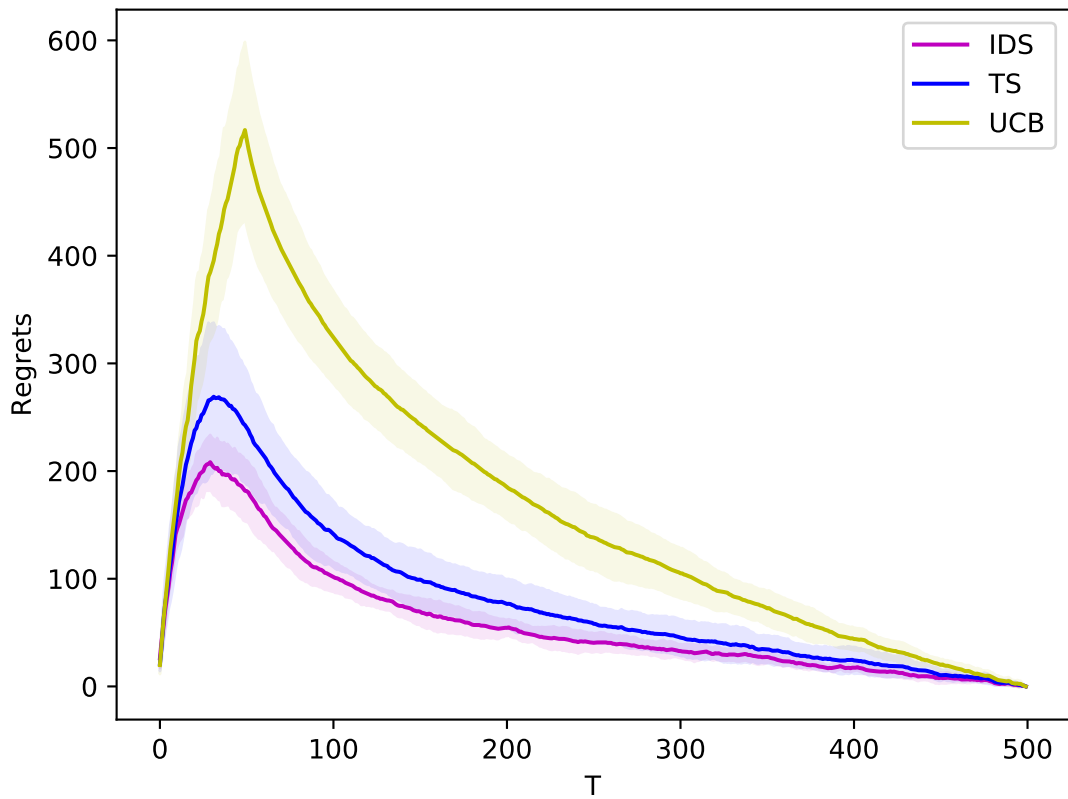

Supplement: Supplementary file 1 [file 07bc8125400bf4b140c332010756bd9b-Supplemental-Conference.zip › Code/selected_results/Linear/3.pdf]

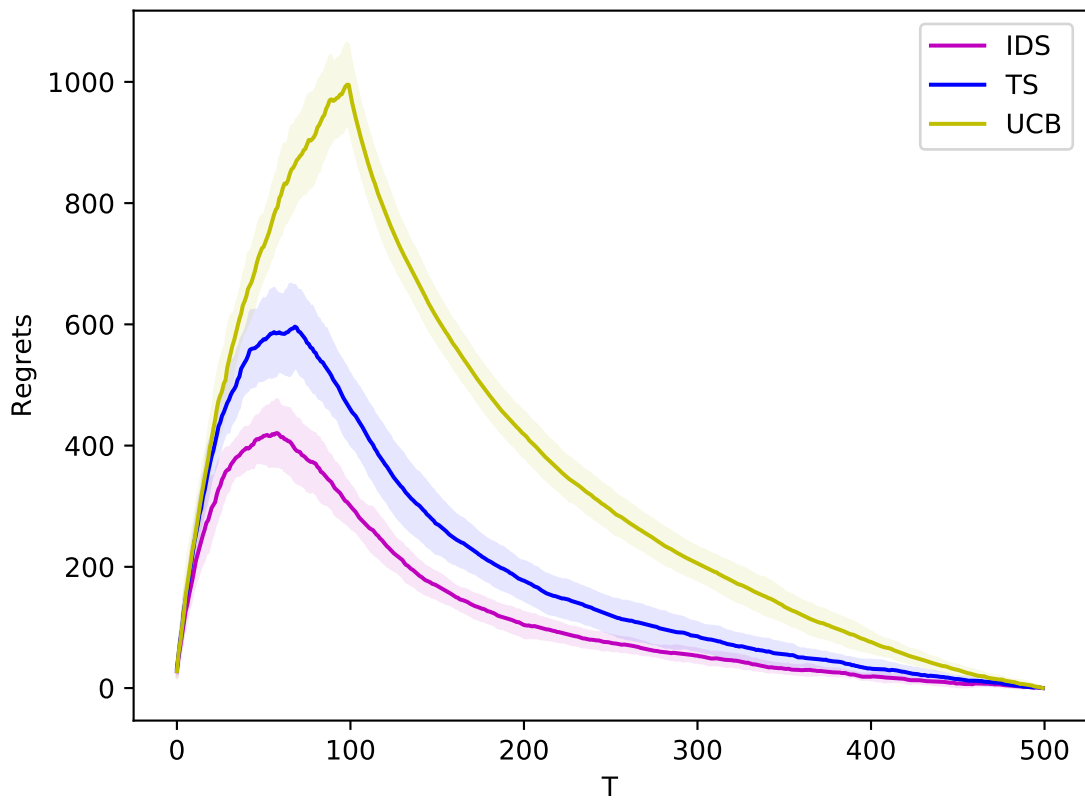

Supplement: Supplementary file 1 [file 07bc8125400bf4b140c332010756bd9b-Supplemental-Conference.zip › Code/selected_results/Linear/2.pdf]

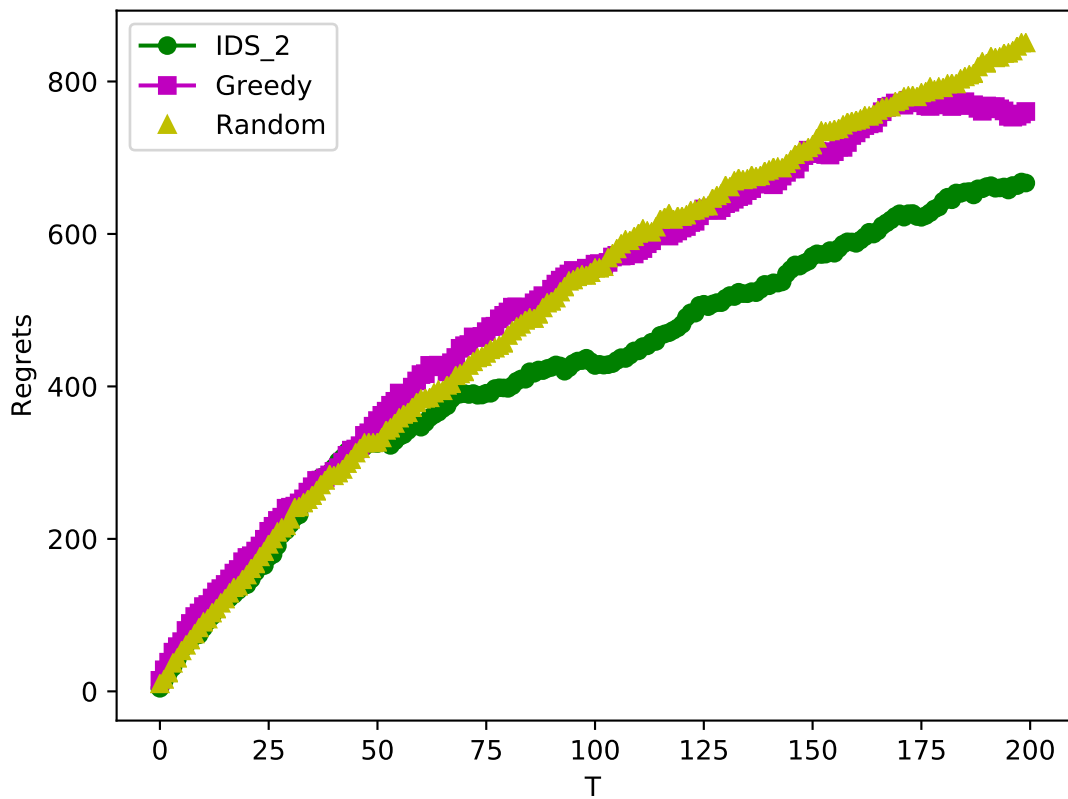

Supplement: Supplementary file 1 [file 07bc8125400bf4b140c332010756bd9b-Supplemental-Conference.zip › Code/selected_results/Matrix_high_noise/IDS_2-Greedy-Random_vs_20220323-105235_labeled.pdf]

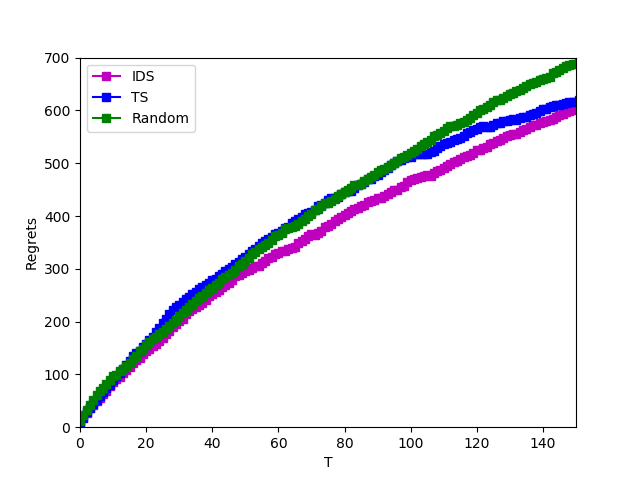

Supplement: Supplementary file 1 [file 07bc8125400bf4b140c332010756bd9b-Supplemental-Conference.zip › Code/selected_results/Matrix_high_noise/Matrix.png]

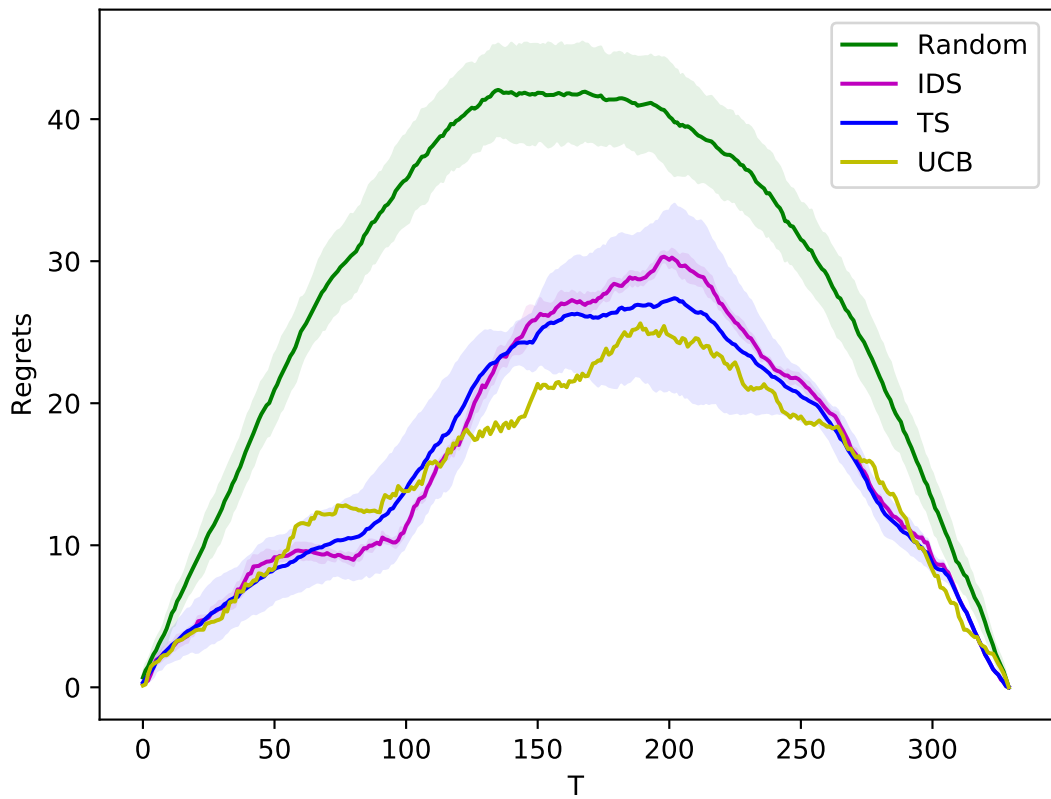

Supplement: Supplementary file 1 [file 07bc8125400bf4b140c332010756bd9b-Supplemental-Conference.zip › Code/selected_results/PNDC/9.pdf]

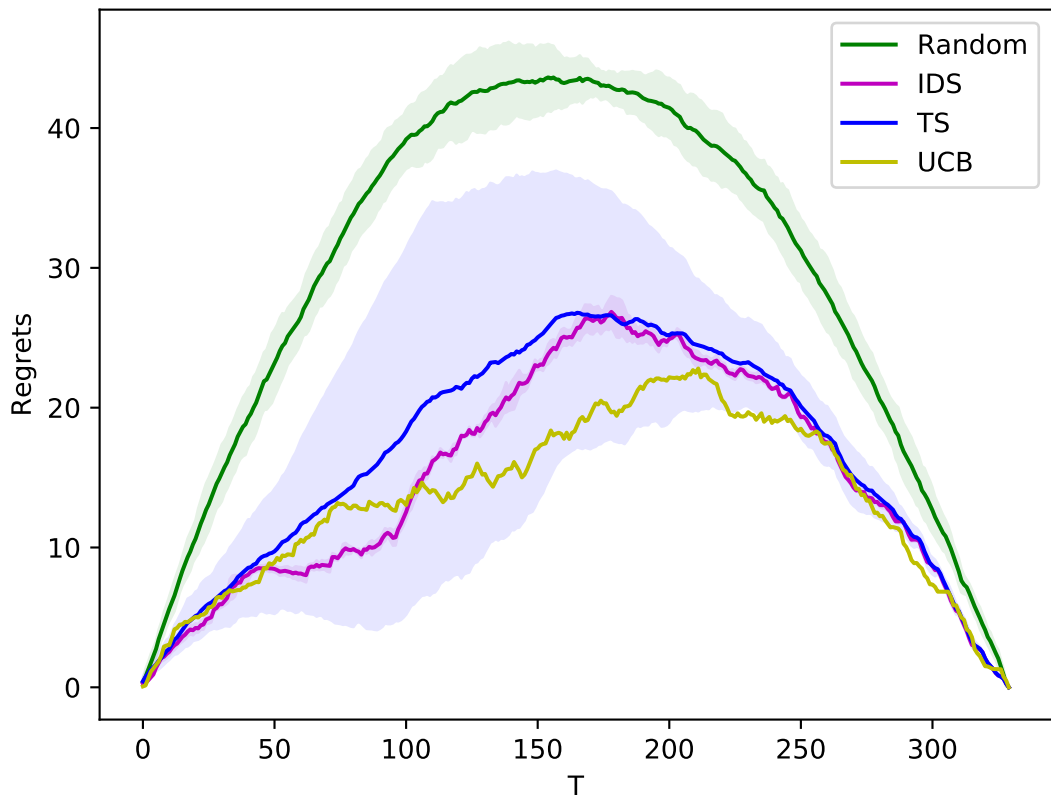

Supplement: Supplementary file 1 [file 07bc8125400bf4b140c332010756bd9b-Supplemental-Conference.zip › Code/selected_results/PNDC/8.pdf]

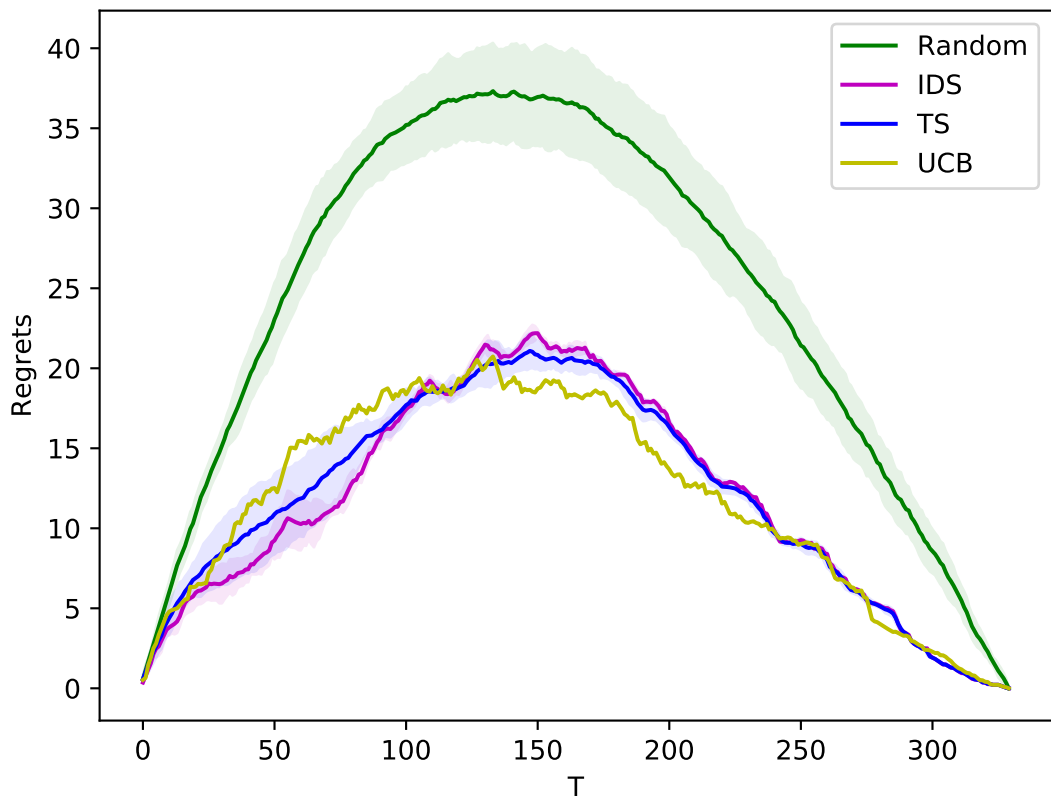

Supplement: Supplementary file 1 [file 07bc8125400bf4b140c332010756bd9b-Supplemental-Conference.zip › Code/selected_results/PNDC/6.pdf]

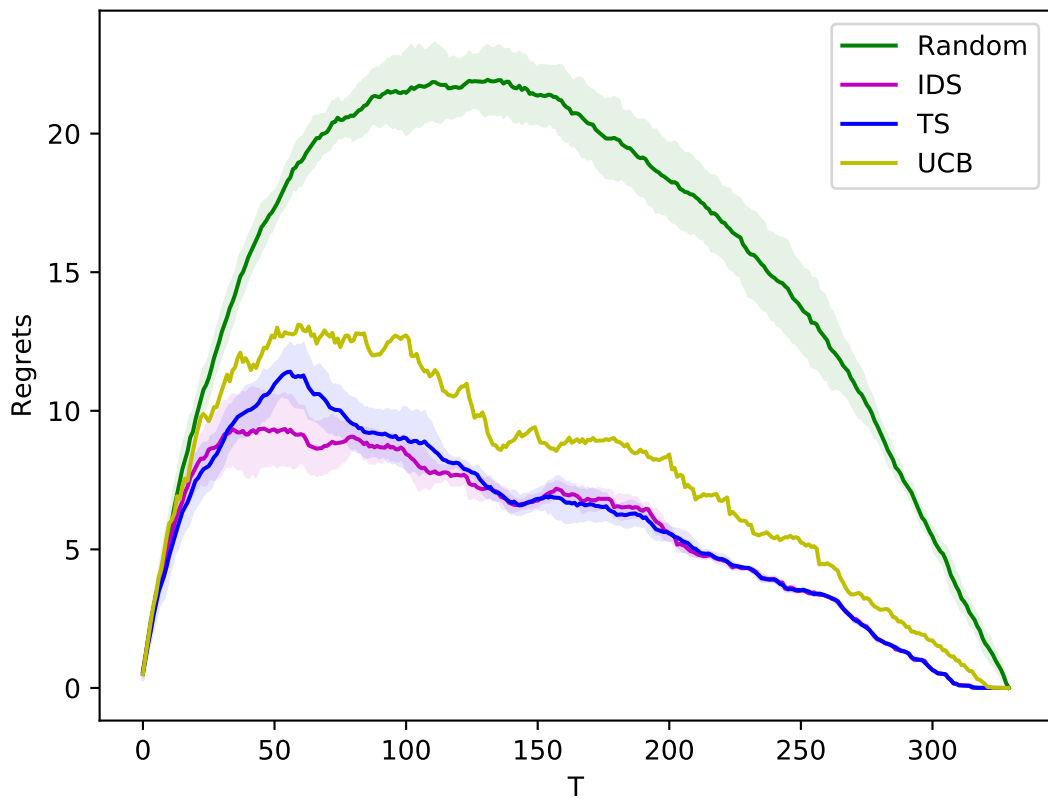

Supplement: Supplementary file 1 [file 07bc8125400bf4b140c332010756bd9b-Supplemental-Conference.zip › Code/selected_results/PNDC/7.pdf]

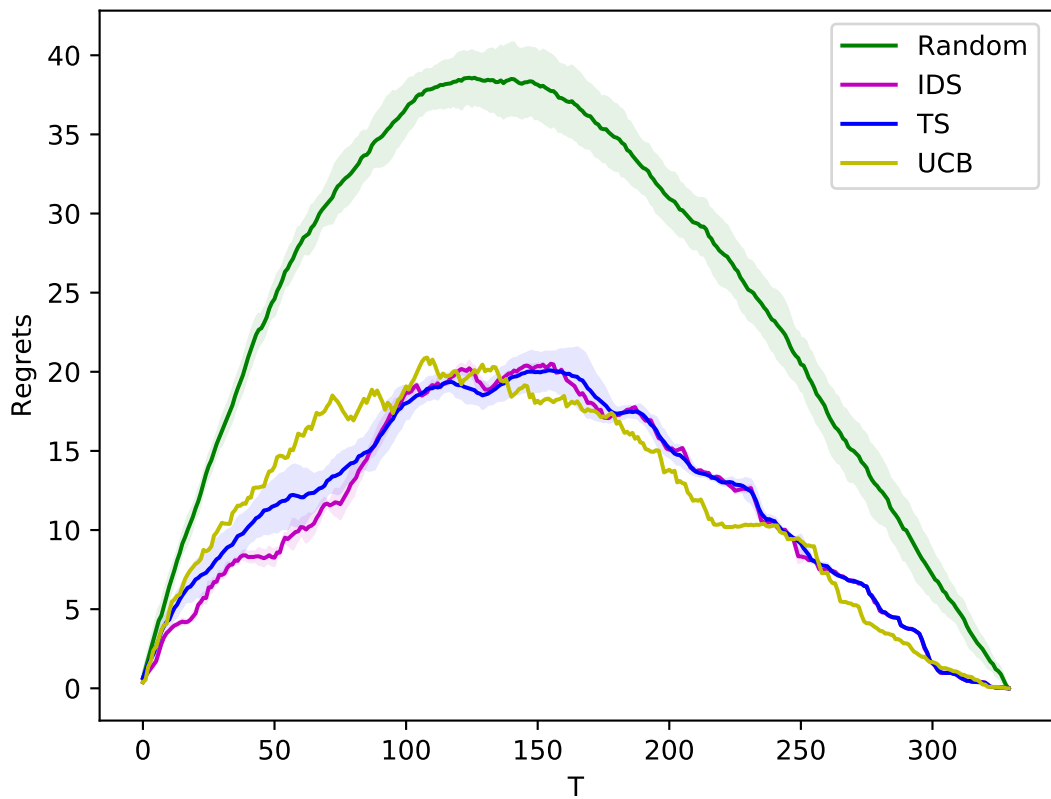

Supplement: Supplementary file 1 [file 07bc8125400bf4b140c332010756bd9b-Supplemental-Conference.zip › Code/selected_results/PNDC/5.pdf]

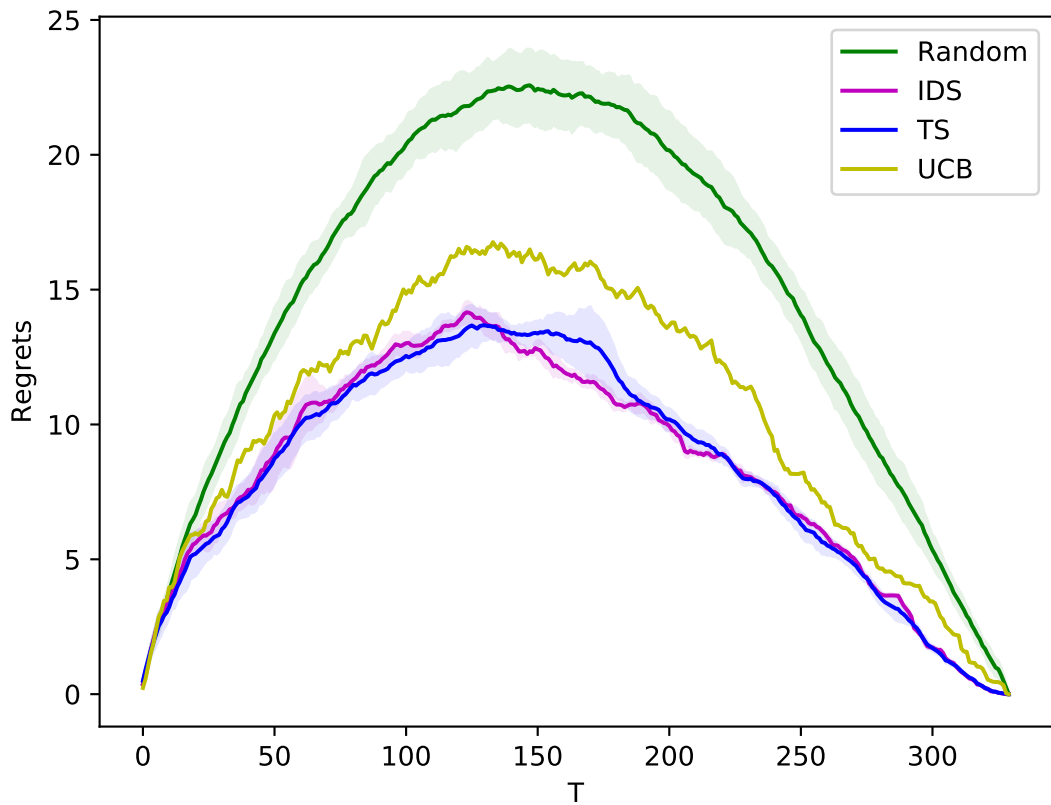

Supplement: Supplementary file 1 [file 07bc8125400bf4b140c332010756bd9b-Supplemental-Conference.zip › Code/selected_results/PNDC/4.pdf]

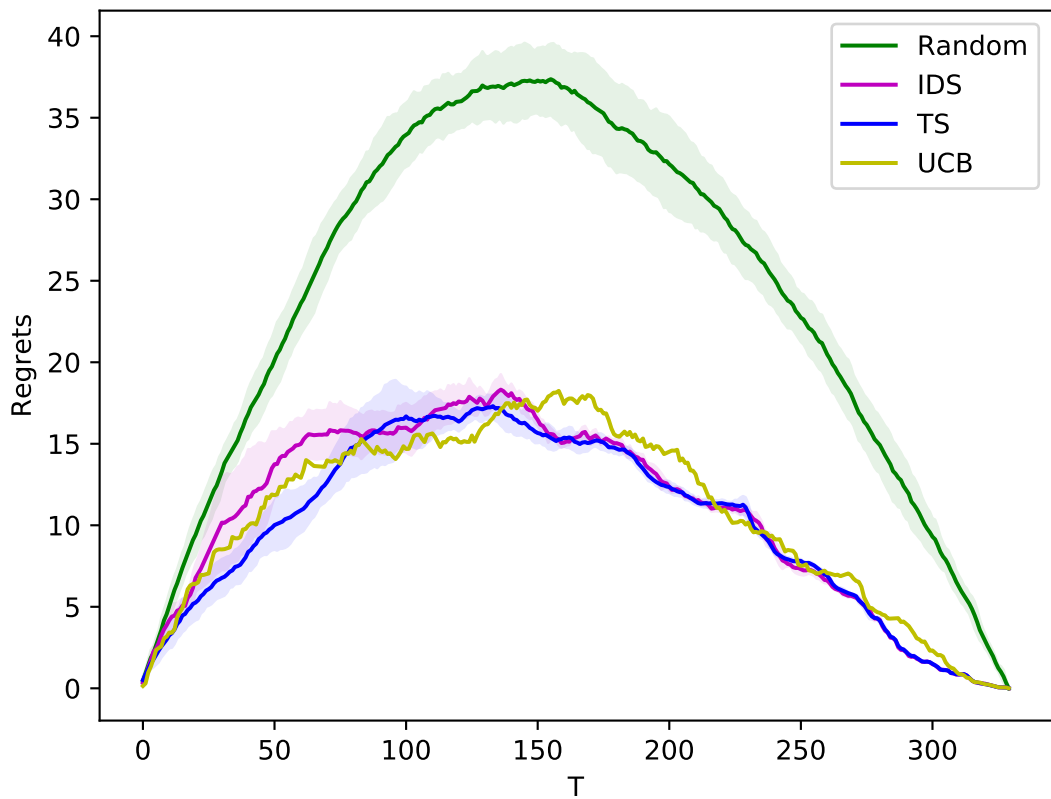

Supplement: Supplementary file 1 [file 07bc8125400bf4b140c332010756bd9b-Supplemental-Conference.zip › Code/selected_results/PNDC/1.pdf]

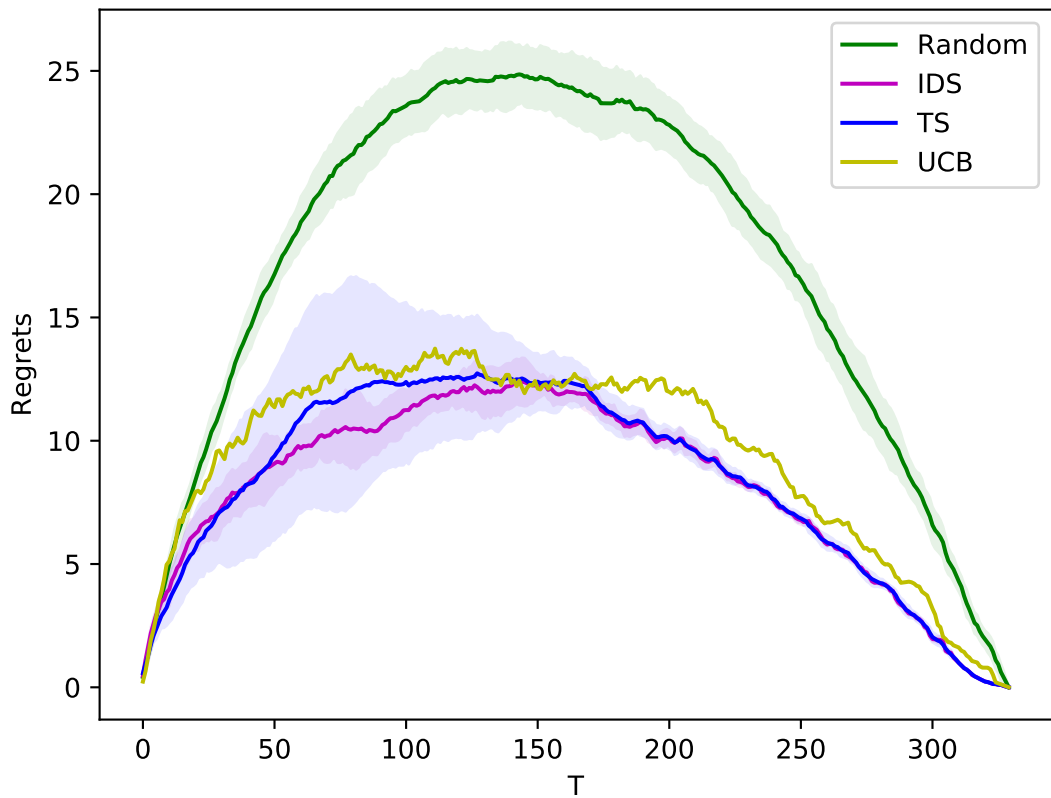

Supplement: Supplementary file 1 [file 07bc8125400bf4b140c332010756bd9b-Supplemental-Conference.zip › Code/selected_results/PNDC/3.pdf]

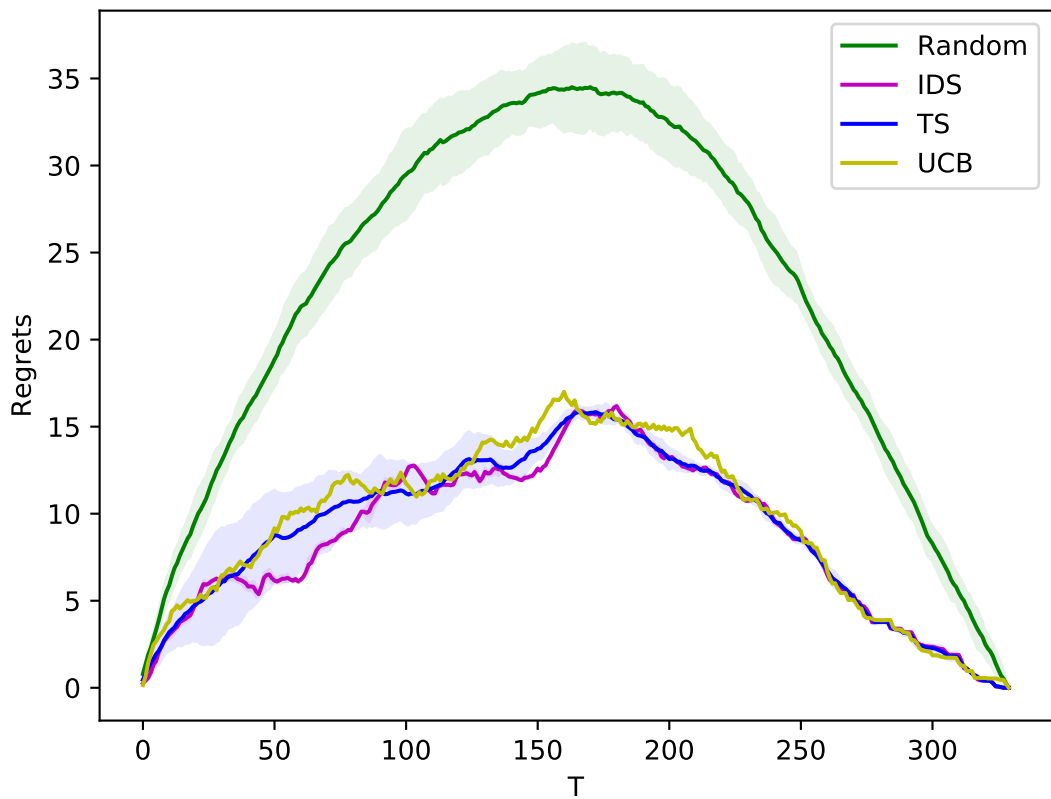

Supplement: Supplementary file 1 [file 07bc8125400bf4b140c332010756bd9b-Supplemental-Conference.zip › Code/selected_results/PNDC/2.pdf]

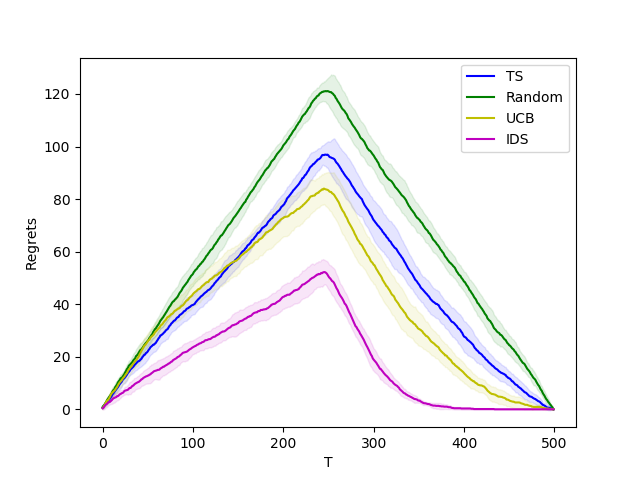

Supplement: Supplementary file 1 [file 07bc8125400bf4b140c332010756bd9b-Supplemental-Conference.zip › Code/selected_results/Logistic/TS-Random-UCB-IDS_vs_20220407-233420/TS-Random-UCB-IDS_vs_20220407-233420_1_labeled.png]

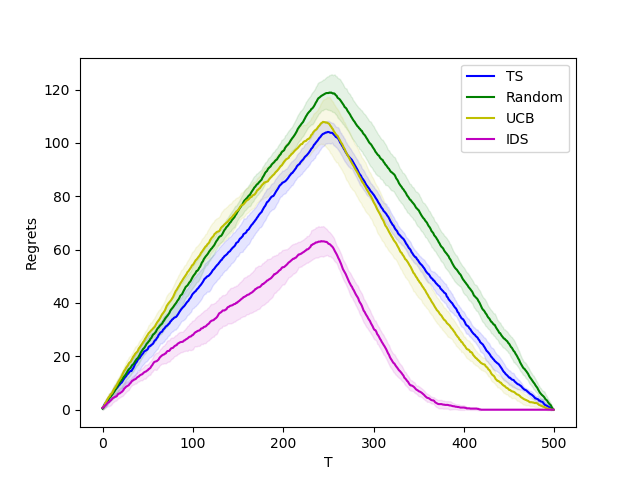

Supplement: Supplementary file 1 [file 07bc8125400bf4b140c332010756bd9b-Supplemental-Conference.zip › Code/selected_results/Logistic/TS-Random-UCB-IDS_vs_20220407-233420/TS-Random-UCB-IDS_vs_20220407-233420_2_labeled.png]

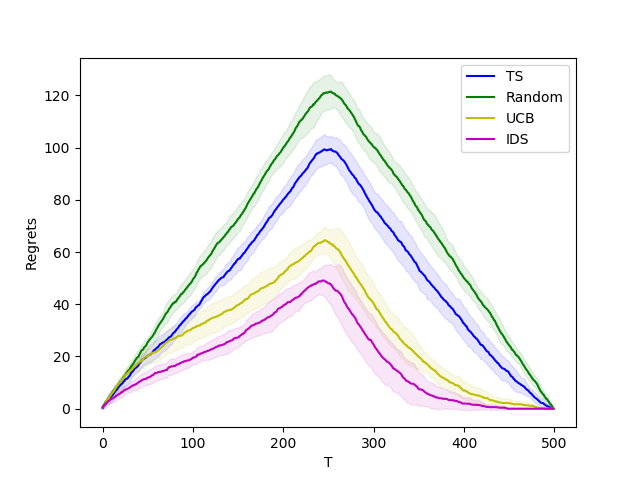

Supplement: Supplementary file 1 [file 07bc8125400bf4b140c332010756bd9b-Supplemental-Conference.zip › Code/selected_results/Logistic/TS-Random-UCB-IDS_vs_20220407-233420/TS-Random-UCB-IDS_vs_20220407-233420_0_labeled.png]

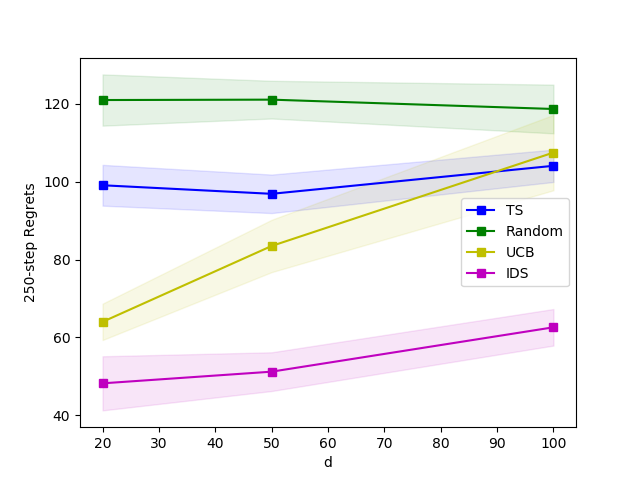

Supplement: Supplementary file 1 [file 07bc8125400bf4b140c332010756bd9b-Supplemental-Conference.zip › Code/selected_results/Logistic/TS-Random-UCB-IDS_vs_20220407-233420/TS-Random-UCB-IDS_vs_20220407-233441_summarized_labeled.png]

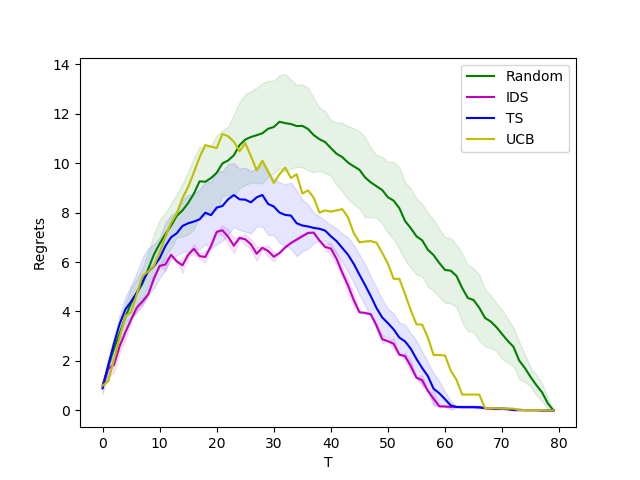

Supplement: Supplementary file 1 [file 07bc8125400bf4b140c332010756bd9b-Supplemental-Conference.zip › Code/selected_results/CNCCI/Random-IDS-TS-UCB_vs_20220407-172745/Random-IDS-TS-UCB_vs_20220407-172745_labeled.png]

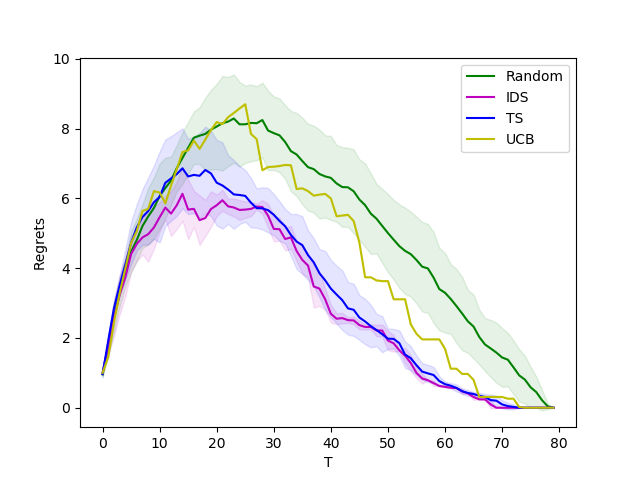

Supplement: Supplementary file 1 [file 07bc8125400bf4b140c332010756bd9b-Supplemental-Conference.zip › Code/selected_results/CNCCI/Random-IDS-TS-UCB_vs_20220407-172848/Random-IDS-TS-UCB_vs_20220407-172848_labeled.png]

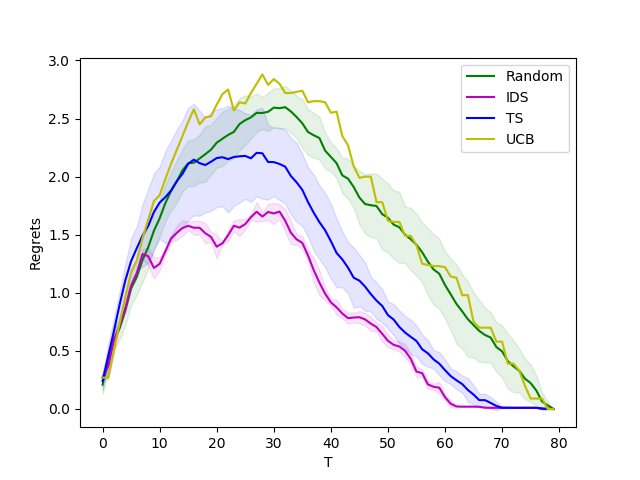

Supplement: Supplementary file 1 [file 07bc8125400bf4b140c332010756bd9b-Supplemental-Conference.zip › Code/selected_results/CNCCI/Random-IDS-TS-UCB_vs_20220407-172812/Random-IDS-TS-UCB_vs_20220407-172812_labeled.png]

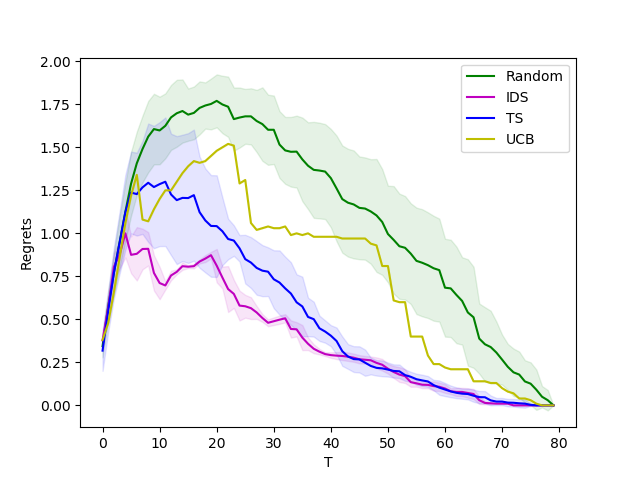

Supplement: Supplementary file 1 [file 07bc8125400bf4b140c332010756bd9b-Supplemental-Conference.zip › Code/selected_results/CNCCI/Random-IDS-TS-UCB_vs_20220407-172840/Random-IDS-TS-UCB_vs_20220407-172840_labeled.png]

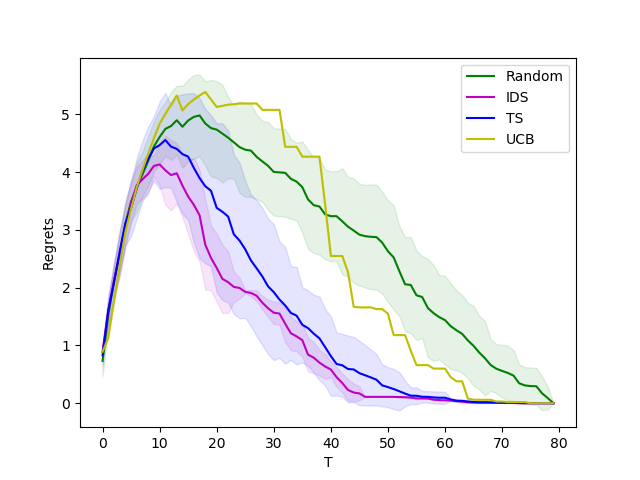

Supplement: Supplementary file 1 [file 07bc8125400bf4b140c332010756bd9b-Supplemental-Conference.zip › Code/selected_results/CNCCI/Random-IDS-TS-UCB_vs_20220407-172822/Random-IDS-TS-UCB_vs_20220407-172822_labeled.png]

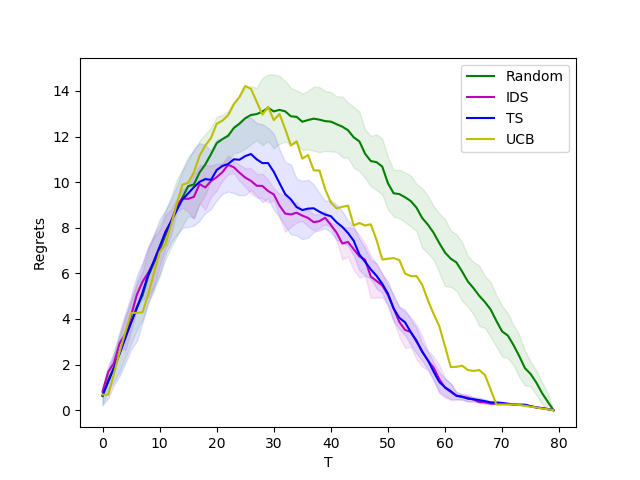

Supplement: Supplementary file 1 [file 07bc8125400bf4b140c332010756bd9b-Supplemental-Conference.zip › Code/selected_results/CNCCI/Random-IDS-TS-UCB_vs_20220407-172905/Random-IDS-TS-UCB_vs_20220407-172905_labeled.png]

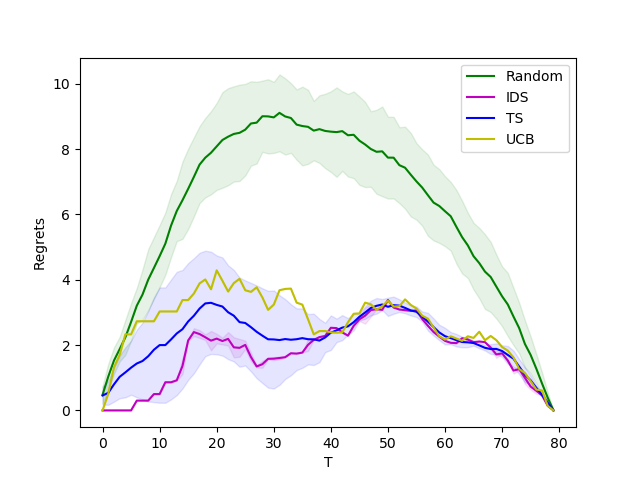

Supplement: Supplementary file 1 [file 07bc8125400bf4b140c332010756bd9b-Supplemental-Conference.zip › Code/selected_results/CNCCI/Random-IDS-TS-UCB_vs_20220407-172914/Random-IDS-TS-UCB_vs_20220407-172914_labeled.png]

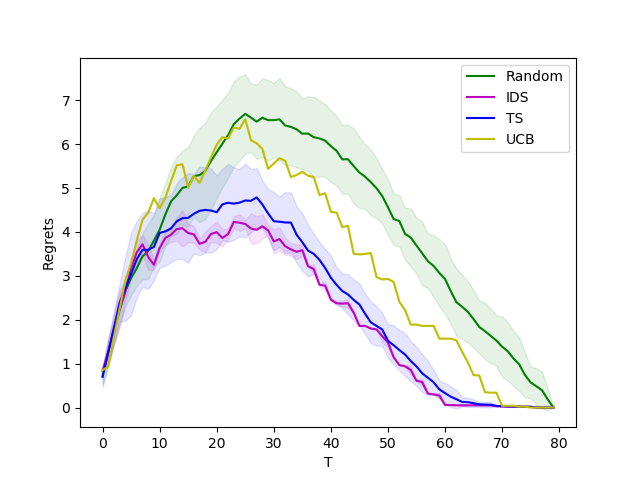

Supplement: Supplementary file 1 [file 07bc8125400bf4b140c332010756bd9b-Supplemental-Conference.zip › Code/selected_results/CNCCI/Random-IDS-TS-UCB_vs_20220407-172857/Random-IDS-TS-UCB_vs_20220407-172857_labeled.png]

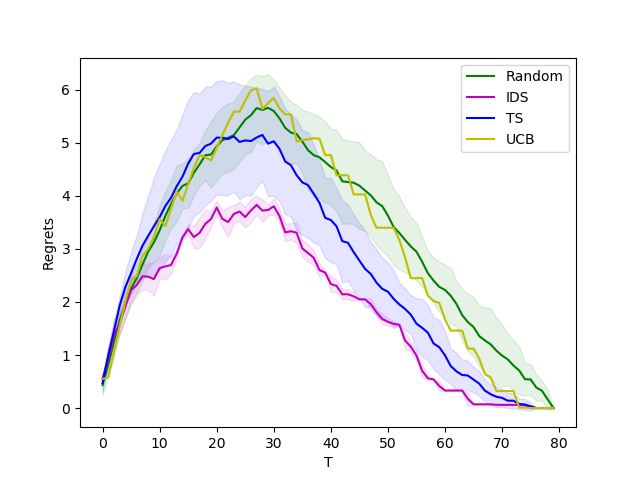

Supplement: Supplementary file 1 [file 07bc8125400bf4b140c332010756bd9b-Supplemental-Conference.zip › Code/selected_results/CNCCI/Random-IDS-TS-UCB_vs_20220407-172803/Random-IDS-TS-UCB_vs_20220407-172803_labeled.png]

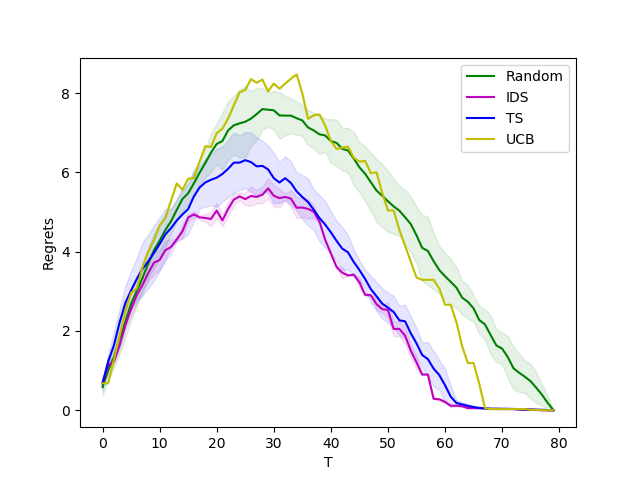

Supplement: Supplementary file 1 [file 07bc8125400bf4b140c332010756bd9b-Supplemental-Conference.zip › Code/selected_results/CNCCI/Random-IDS-TS-UCB_vs_20220407-172832/Random-IDS-TS-UCB_vs_20220407-172832_labeled.png]

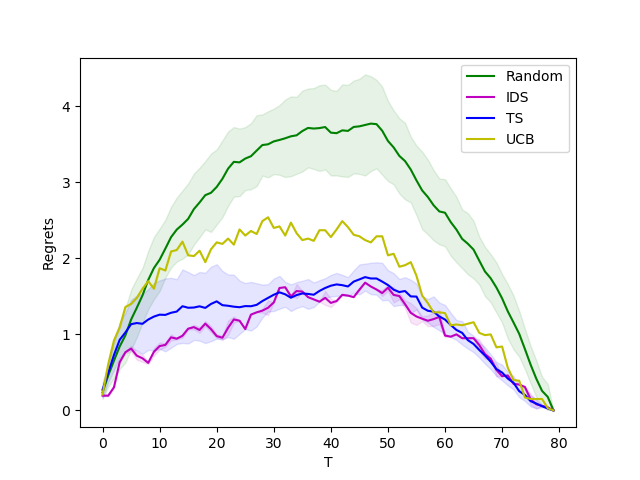

Supplement: Supplementary file 1 [file 07bc8125400bf4b140c332010756bd9b-Supplemental-Conference.zip › Code/selected_results/CNCCI/Random-IDS-TS-UCB_vs_20220407-172754/Random-IDS-TS-UCB_vs_20220407-172754_labeled.png]

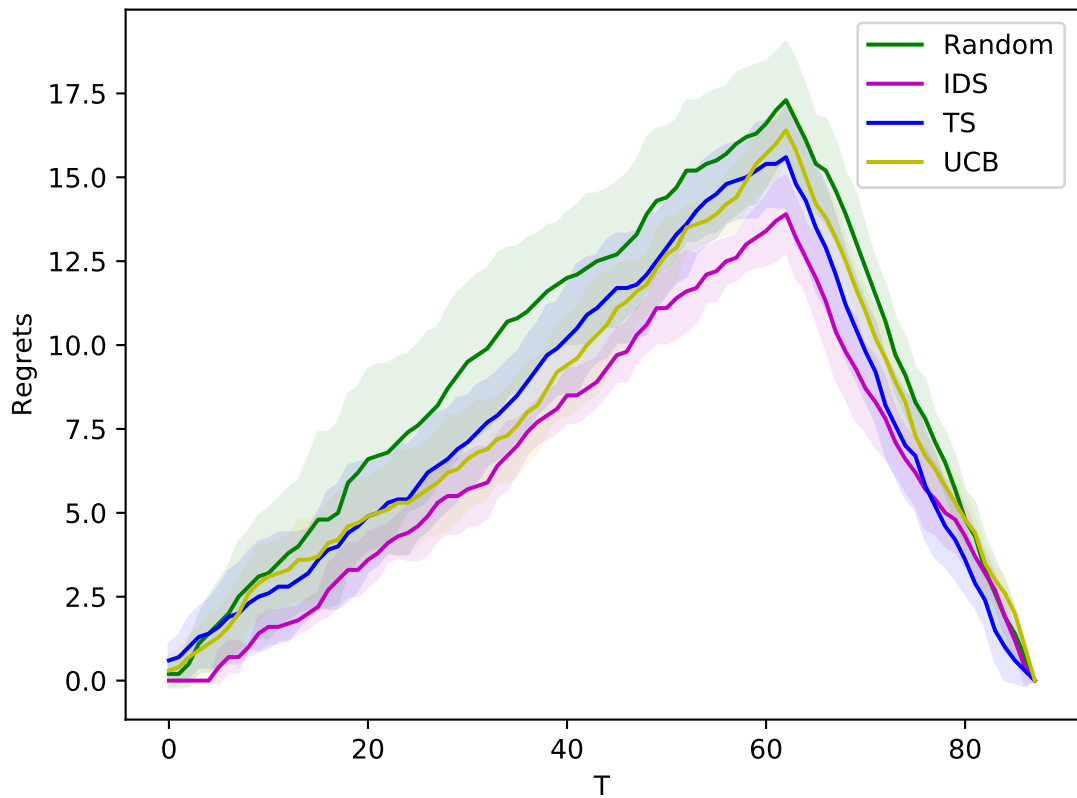

Supplement: Supplementary file 1 [file 07bc8125400bf4b140c332010756bd9b-Supplemental-Conference.zip › Code/selected_results/Real_data/Logistic_Regression/Real_logistic.pdf]

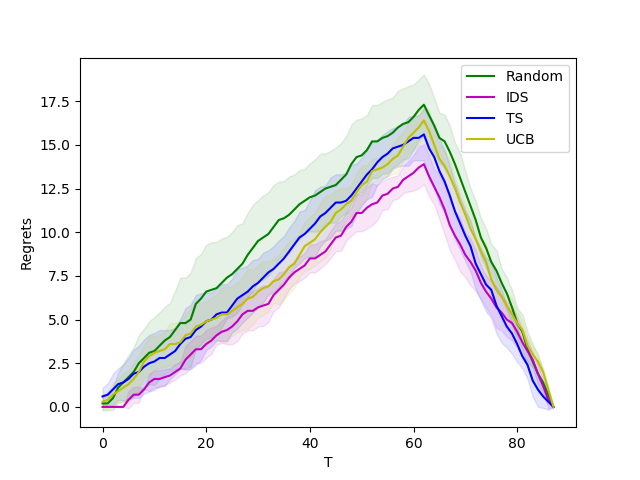

Supplement: Supplementary file 1 [file 07bc8125400bf4b140c332010756bd9b-Supplemental-Conference.zip › Code/selected_results/Real_data/Logistic_Regression/Random-IDS-TS-UCB_vs_20220407-212339_labeled.png]

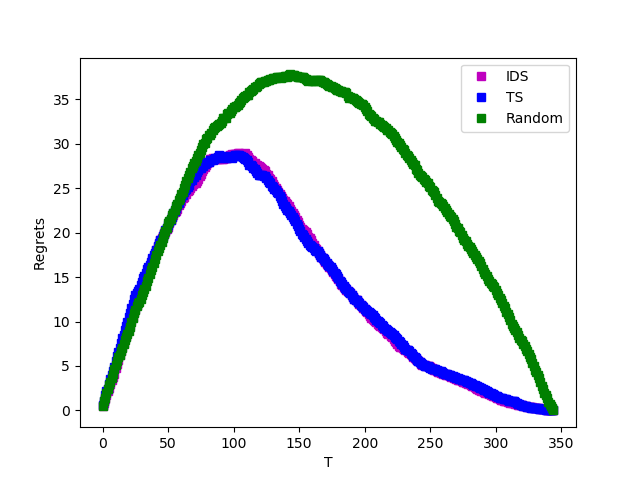

Supplement: Supplementary file 1 [file 07bc8125400bf4b140c332010756bd9b-Supplemental-Conference.zip › Code/selected_results/Real_data/Matrix_23_15_01/Real_matrix_23_15.png]

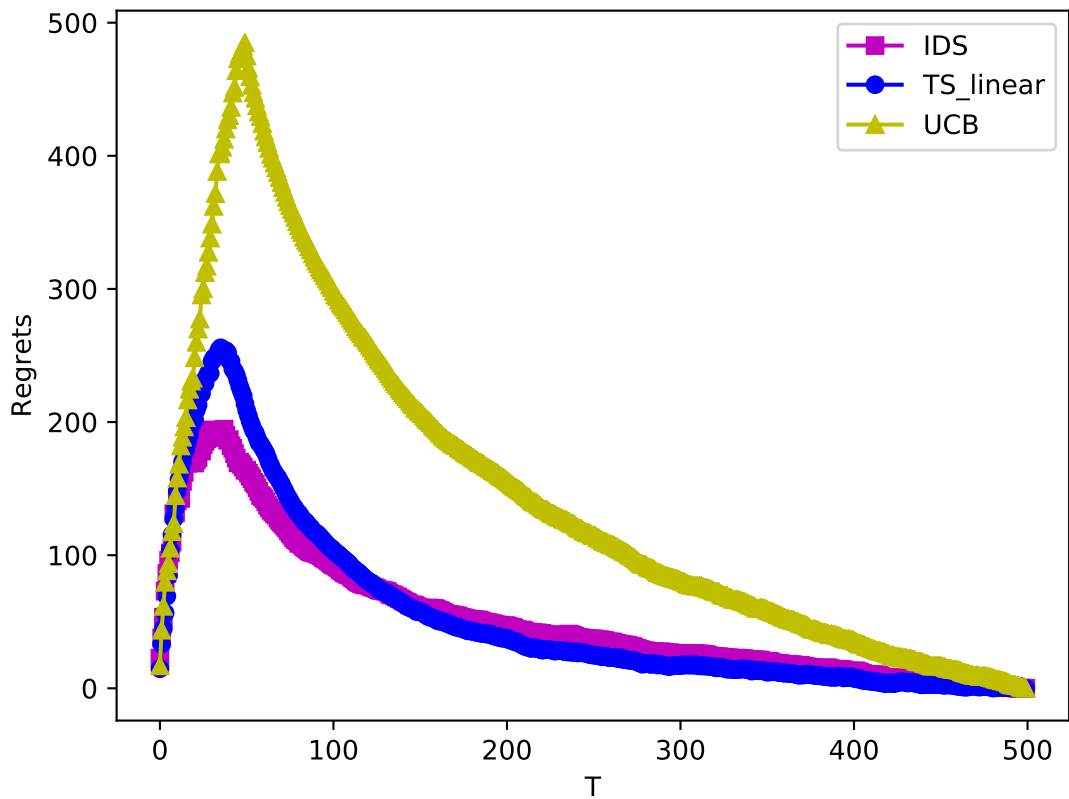

Supplement: Supplementary file 1 [file 07bc8125400bf4b140c332010756bd9b-Supplemental-Conference.zip › Code/selected_results/Linear/old/IDS-TS-UCB_vs_20220325-112354_50_labeled.pdf]

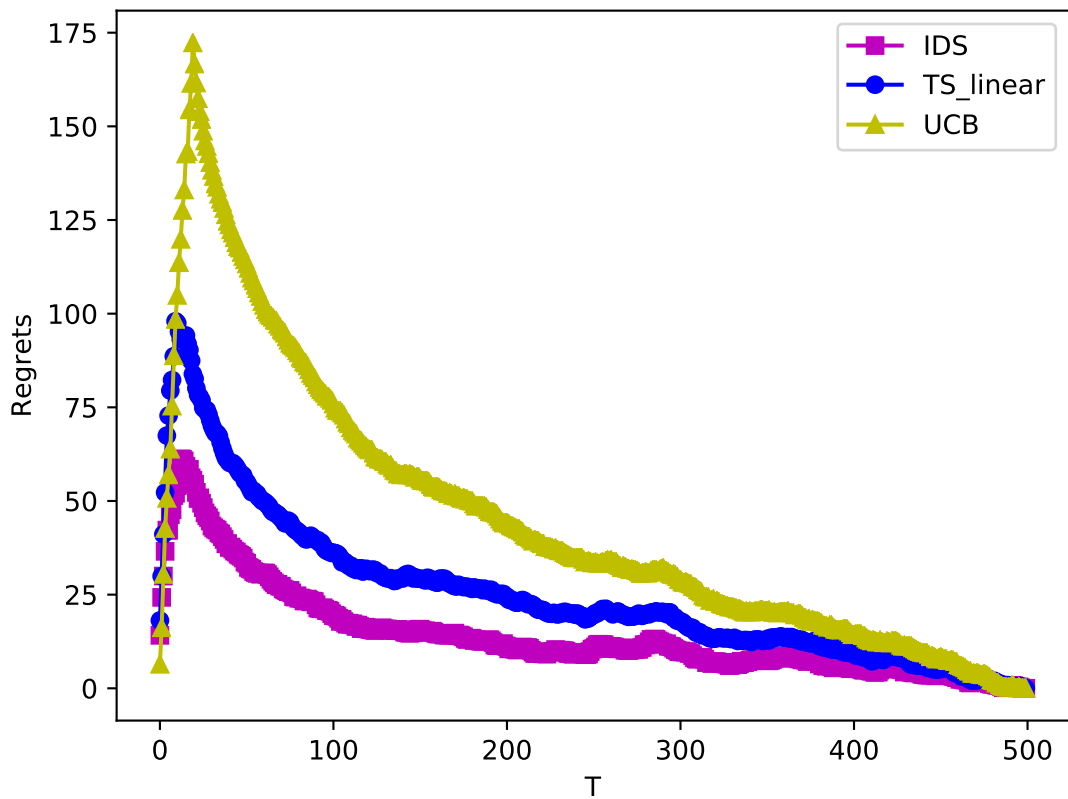

Supplement: Supplementary file 1 [file 07bc8125400bf4b140c332010756bd9b-Supplemental-Conference.zip › Code/selected_results/Linear/old/IDS-TS-UCB_vs_20220325-112354_20_labeled.pdf]

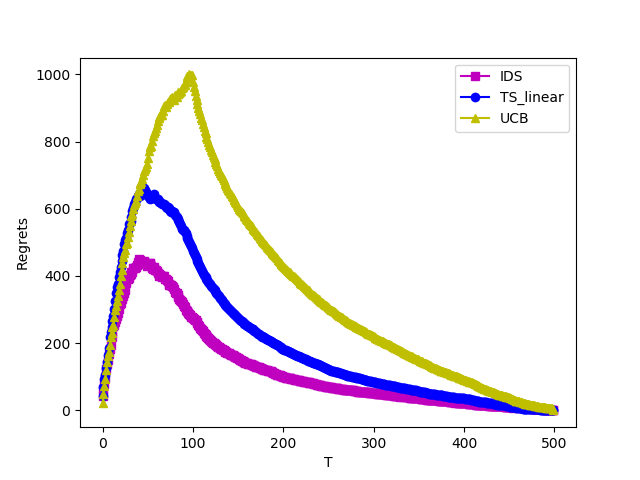

Supplement: Supplementary file 1 [file 07bc8125400bf4b140c332010756bd9b-Supplemental-Conference.zip › Code/selected_results/Linear/old/Linear_d4.png]

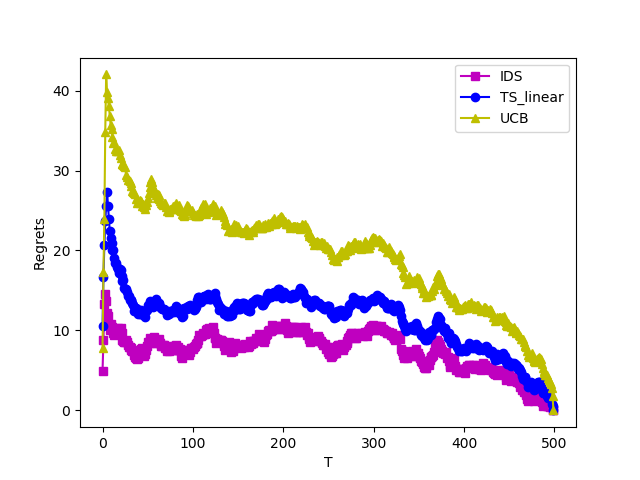

Supplement: Supplementary file 1 [file 07bc8125400bf4b140c332010756bd9b-Supplemental-Conference.zip › Code/selected_results/Linear/old/Linear_d1.png]

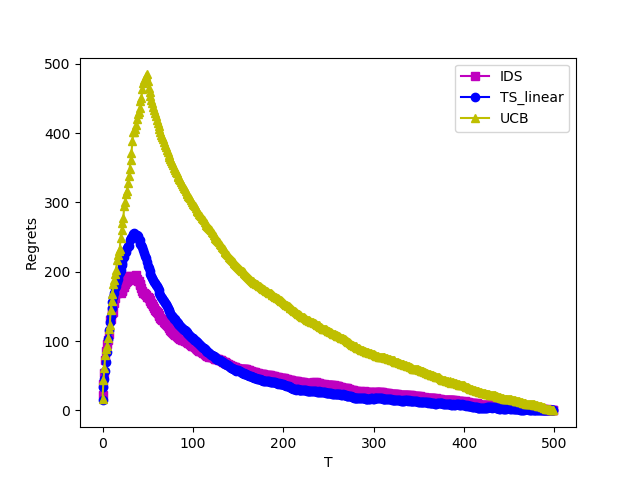

Supplement: Supplementary file 1 [file 07bc8125400bf4b140c332010756bd9b-Supplemental-Conference.zip › Code/selected_results/Linear/old/Linear_d3.png]

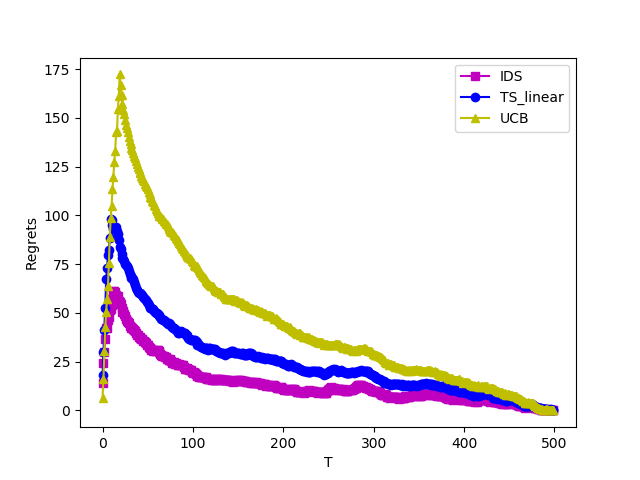

Supplement: Supplementary file 1 [file 07bc8125400bf4b140c332010756bd9b-Supplemental-Conference.zip › Code/selected_results/Linear/old/Linear_d2.png]

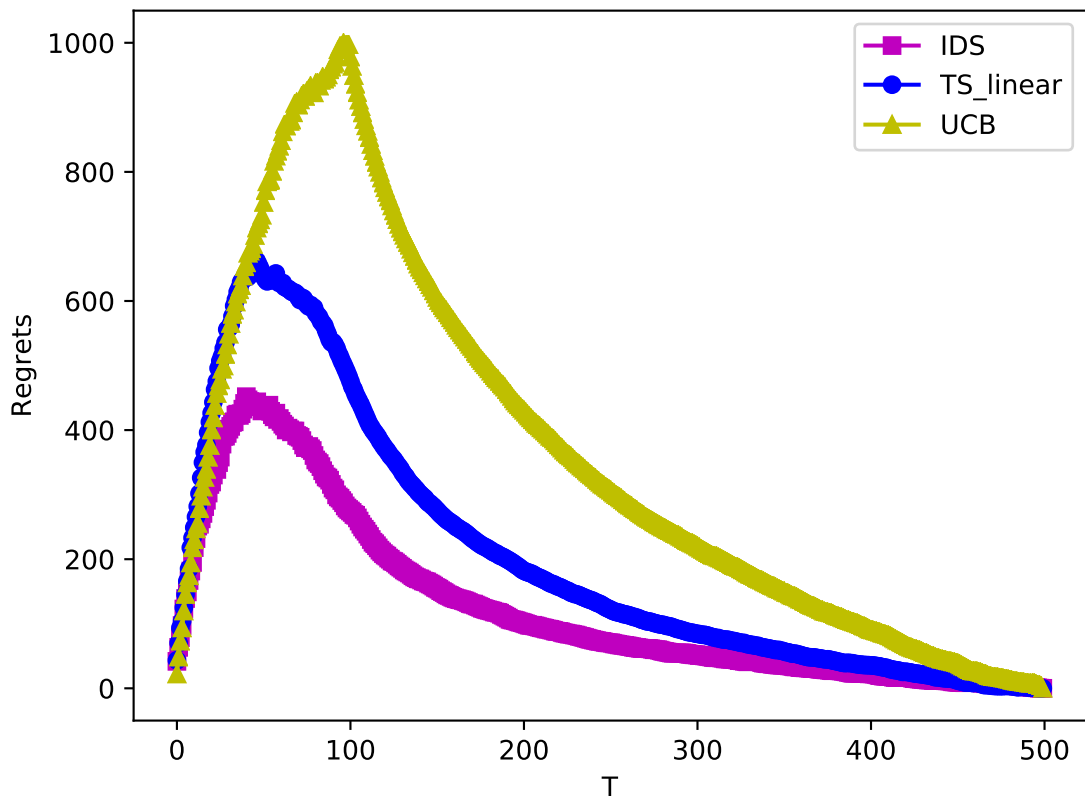

Supplement: Supplementary file 1 [file 07bc8125400bf4b140c332010756bd9b-Supplemental-Conference.zip › Code/selected_results/Linear/old/IDS-TS-UCB_vs_20220325-112354_100_labeled.pdf]

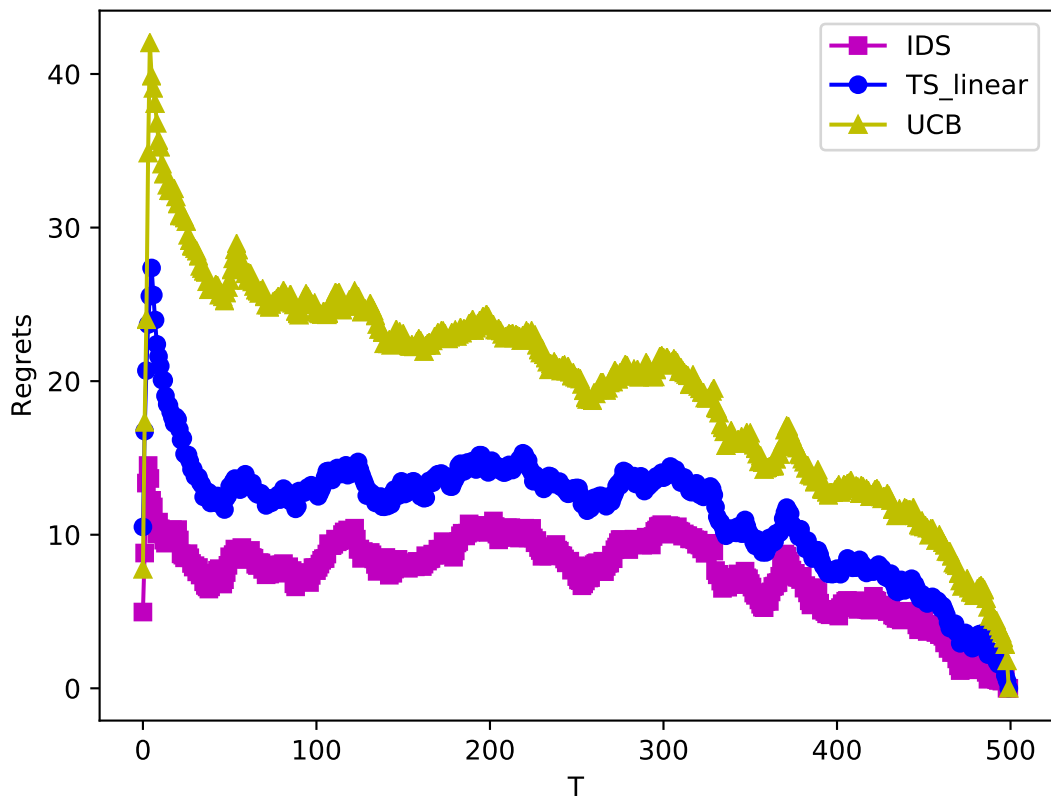

Supplement: Supplementary file 1 [file 07bc8125400bf4b140c332010756bd9b-Supplemental-Conference.zip › Code/selected_results/Linear/old/IDS-TS-UCB_vs_20220325-112354_5_labeled.pdf]

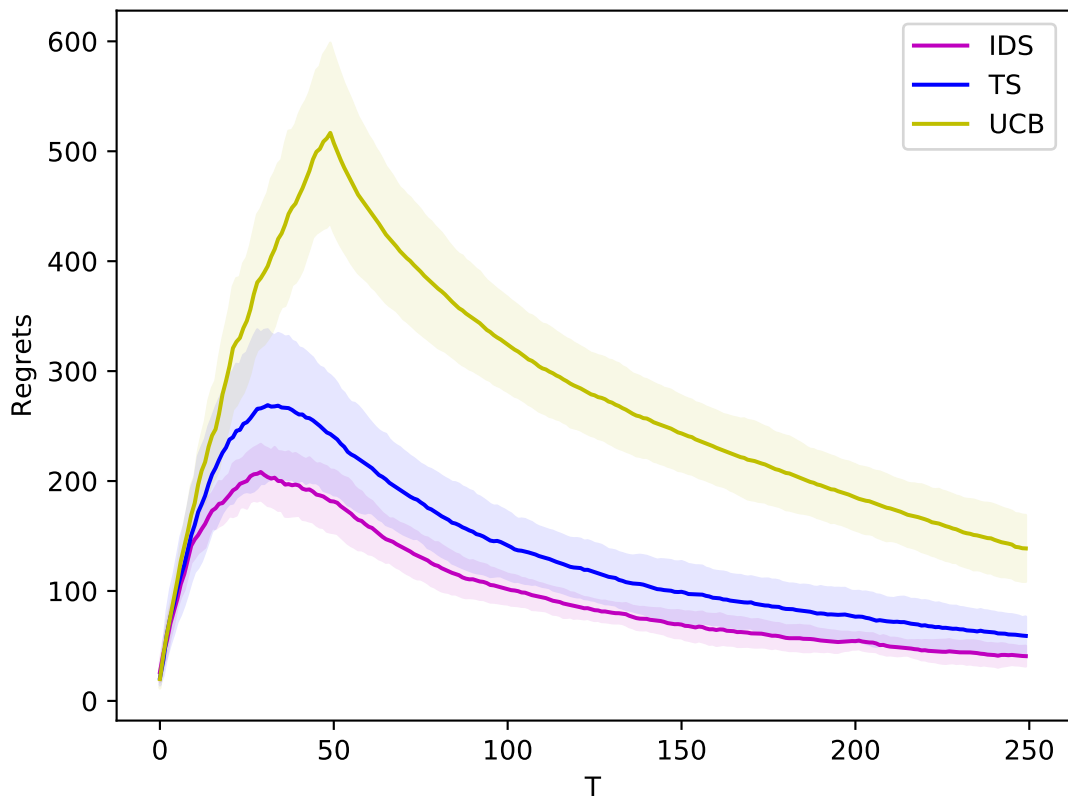

Supplement: Supplementary file 1 [file 07bc8125400bf4b140c332010756bd9b-Supplemental-Conference.zip › Code/selected_results/Linear/IDS-TS-UCB_vs_20220406-150507/IDS-TS-UCB_vs_20220406-150507_1_labeled.pdf]

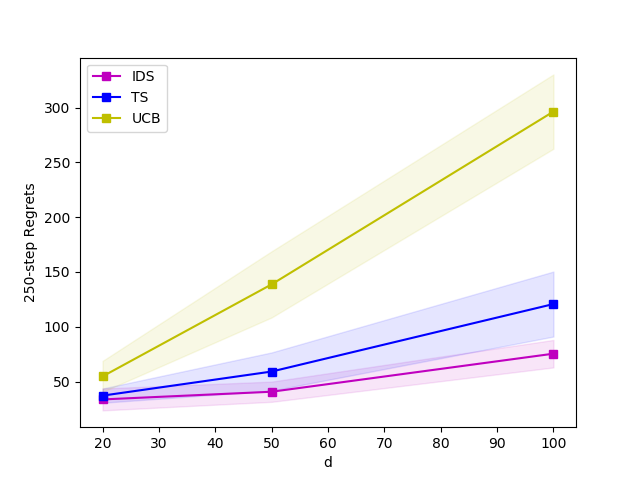

Supplement: Supplementary file 1 [file 07bc8125400bf4b140c332010756bd9b-Supplemental-Conference.zip › Code/selected_results/Linear/IDS-TS-UCB_vs_20220406-150507/IDS-TS-UCB_vs_20220406-150507_summarized_labeled.png]

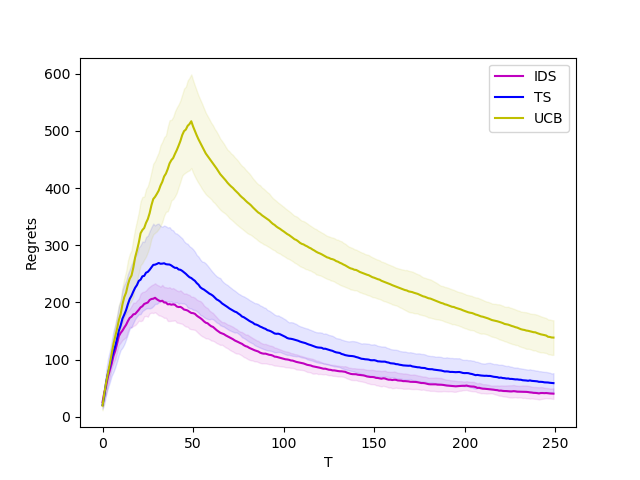

Supplement: Supplementary file 1 [file 07bc8125400bf4b140c332010756bd9b-Supplemental-Conference.zip › Code/selected_results/Linear/IDS-TS-UCB_vs_20220406-150507/IDS-TS-UCB_vs_20220406-150507_1_labeled.png]

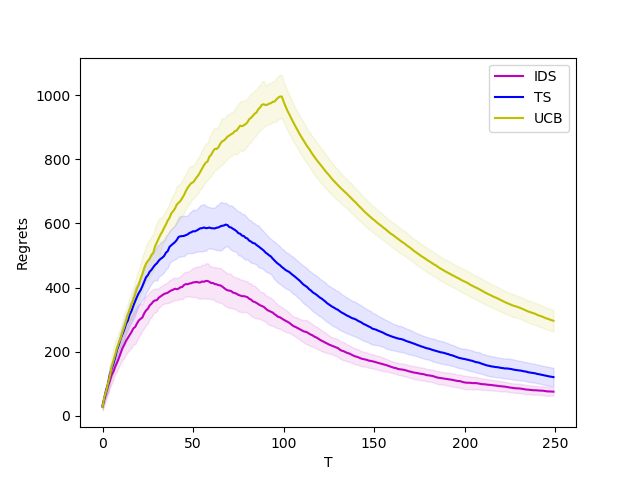

Supplement: Supplementary file 1 [file 07bc8125400bf4b140c332010756bd9b-Supplemental-Conference.zip › Code/selected_results/Linear/IDS-TS-UCB_vs_20220406-150507/IDS-TS-UCB_vs_20220406-150507_2_labeled.png]

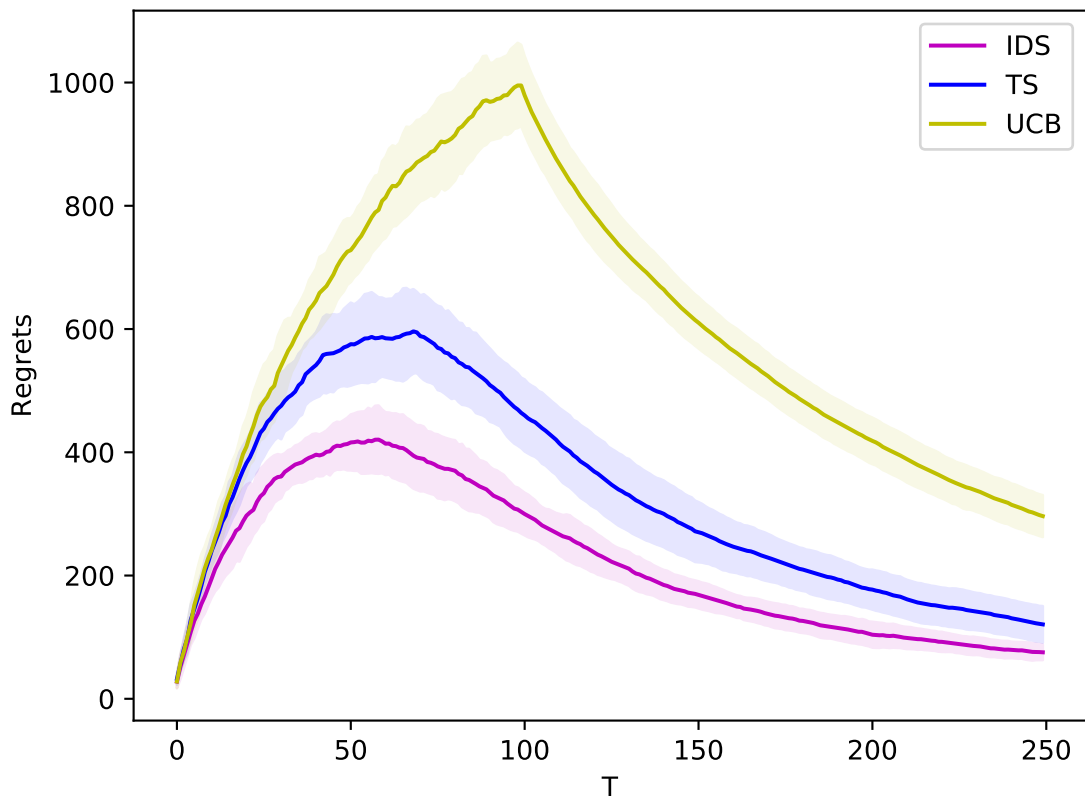

Supplement: Supplementary file 1 [file 07bc8125400bf4b140c332010756bd9b-Supplemental-Conference.zip › Code/selected_results/Linear/IDS-TS-UCB_vs_20220406-150507/IDS-TS-UCB_vs_20220406-150507_2_labeled.pdf]

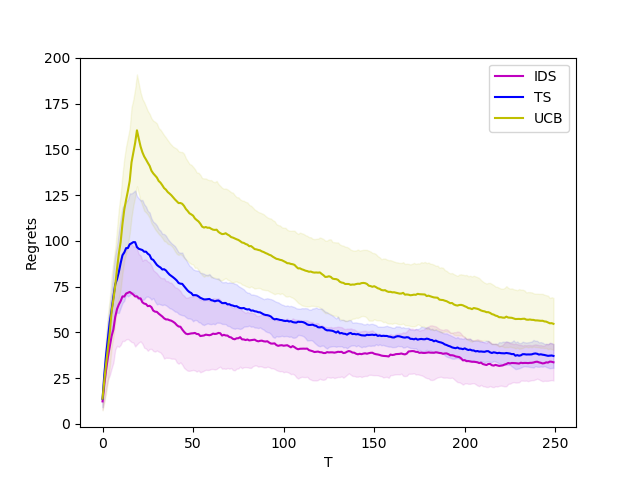

Supplement: Supplementary file 1 [file 07bc8125400bf4b140c332010756bd9b-Supplemental-Conference.zip › Code/selected_results/Linear/IDS-TS-UCB_vs_20220406-150507/IDS-TS-UCB_vs_20220406-150507_0_labeled.png]

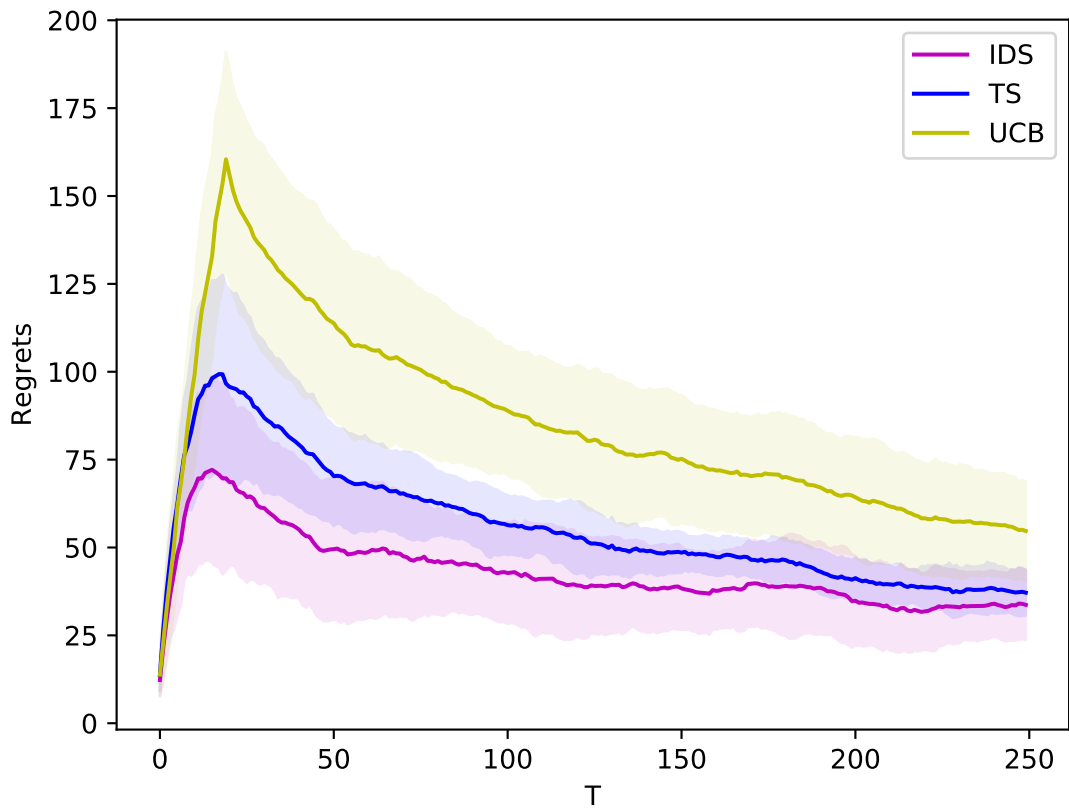

Supplement: Supplementary file 1 [file 07bc8125400bf4b140c332010756bd9b-Supplemental-Conference.zip › Code/selected_results/Linear/IDS-TS-UCB_vs_20220406-150507/IDS-TS-UCB_vs_20220406-150507_0_labeled.pdf]

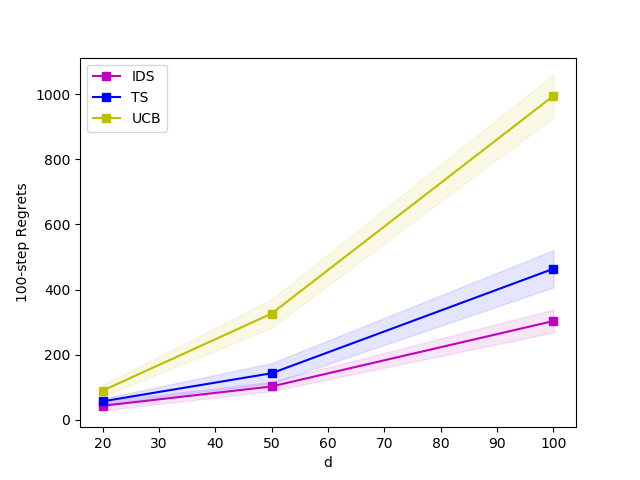

Supplement: Supplementary file 1 [file 07bc8125400bf4b140c332010756bd9b-Supplemental-Conference.zip › Code/selected_results/Linear/IDS-TS-UCB_vs_20220406-155945/IDS-TS-UCB_vs_20220406-155945_summarized_labeled.png]

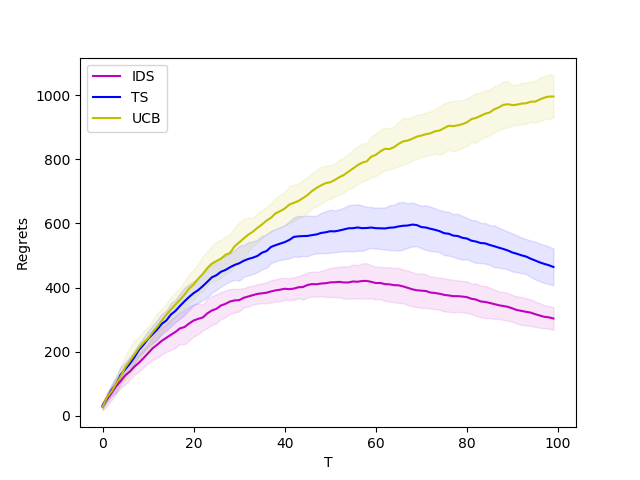

Supplement: Supplementary file 1 [file 07bc8125400bf4b140c332010756bd9b-Supplemental-Conference.zip › Code/selected_results/Linear/IDS-TS-UCB_vs_20220406-155945/IDS-TS-UCB_vs_20220406-155945_2_labeled.png]

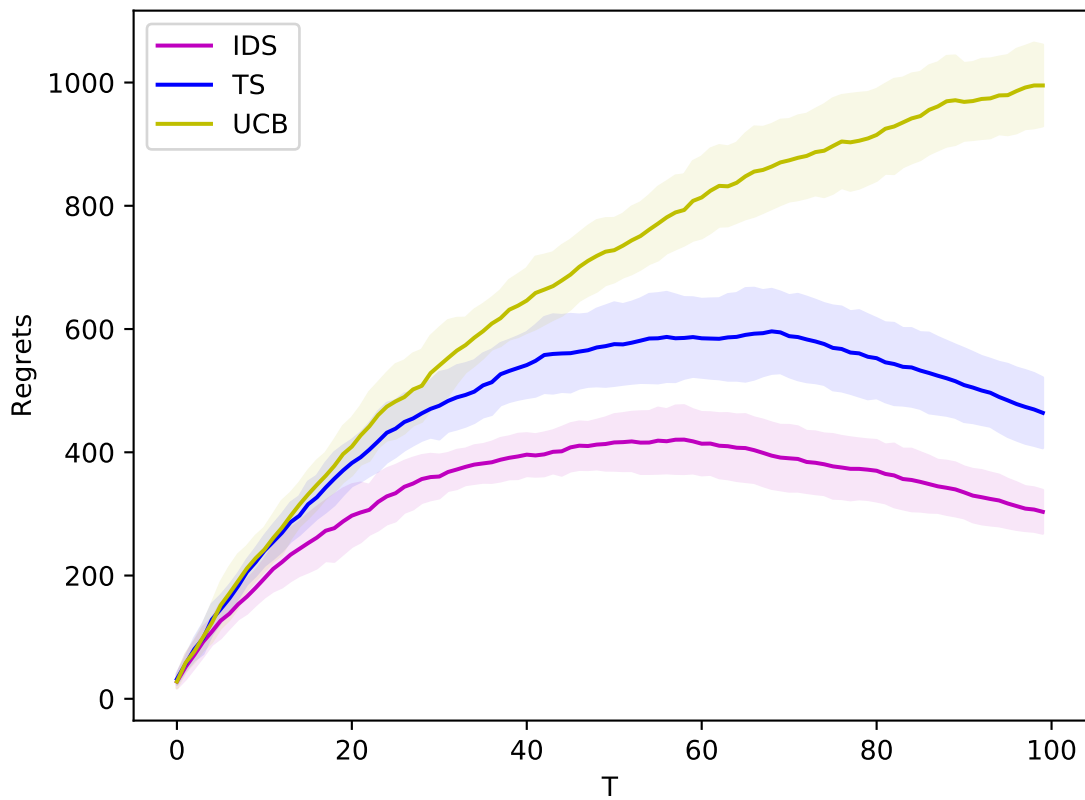

Supplement: Supplementary file 1 [file 07bc8125400bf4b140c332010756bd9b-Supplemental-Conference.zip › Code/selected_results/Linear/IDS-TS-UCB_vs_20220406-155945/IDS-TS-UCB_vs_20220406-155945_2_labeled.pdf]

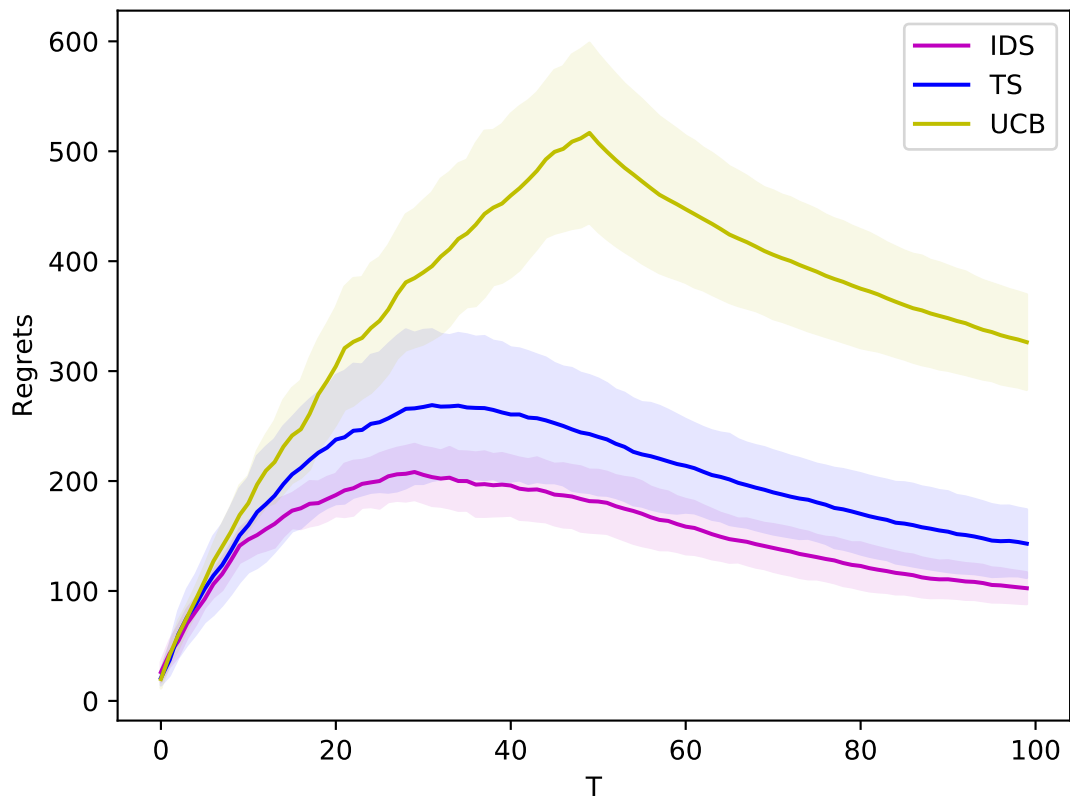

Supplement: Supplementary file 1 [file 07bc8125400bf4b140c332010756bd9b-Supplemental-Conference.zip › Code/selected_results/Linear/IDS-TS-UCB_vs_20220406-155945/IDS-TS-UCB_vs_20220406-155945_1_labeled.pdf]

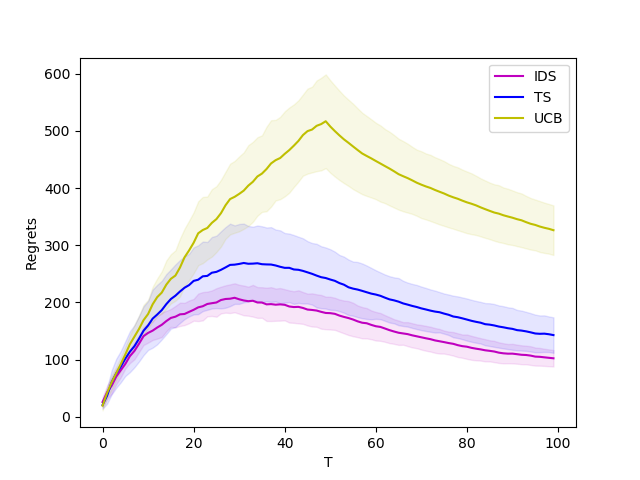

Supplement: Supplementary file 1 [file 07bc8125400bf4b140c332010756bd9b-Supplemental-Conference.zip › Code/selected_results/Linear/IDS-TS-UCB_vs_20220406-155945/IDS-TS-UCB_vs_20220406-155945_1_labeled.png]

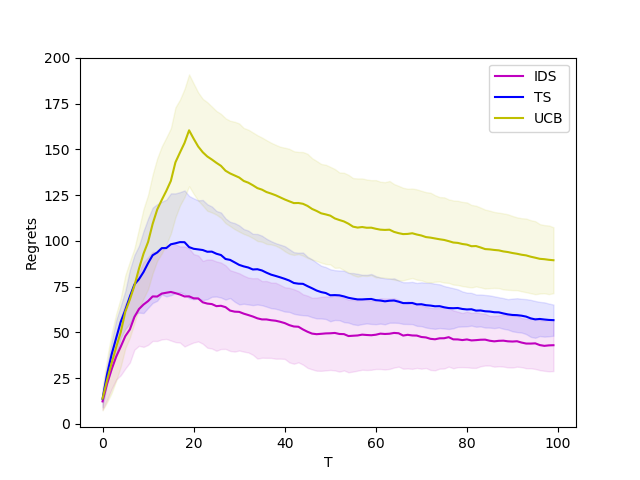

Supplement: Supplementary file 1 [file 07bc8125400bf4b140c332010756bd9b-Supplemental-Conference.zip › Code/selected_results/Linear/IDS-TS-UCB_vs_20220406-155945/IDS-TS-UCB_vs_20220406-155945_0_labeled.png]

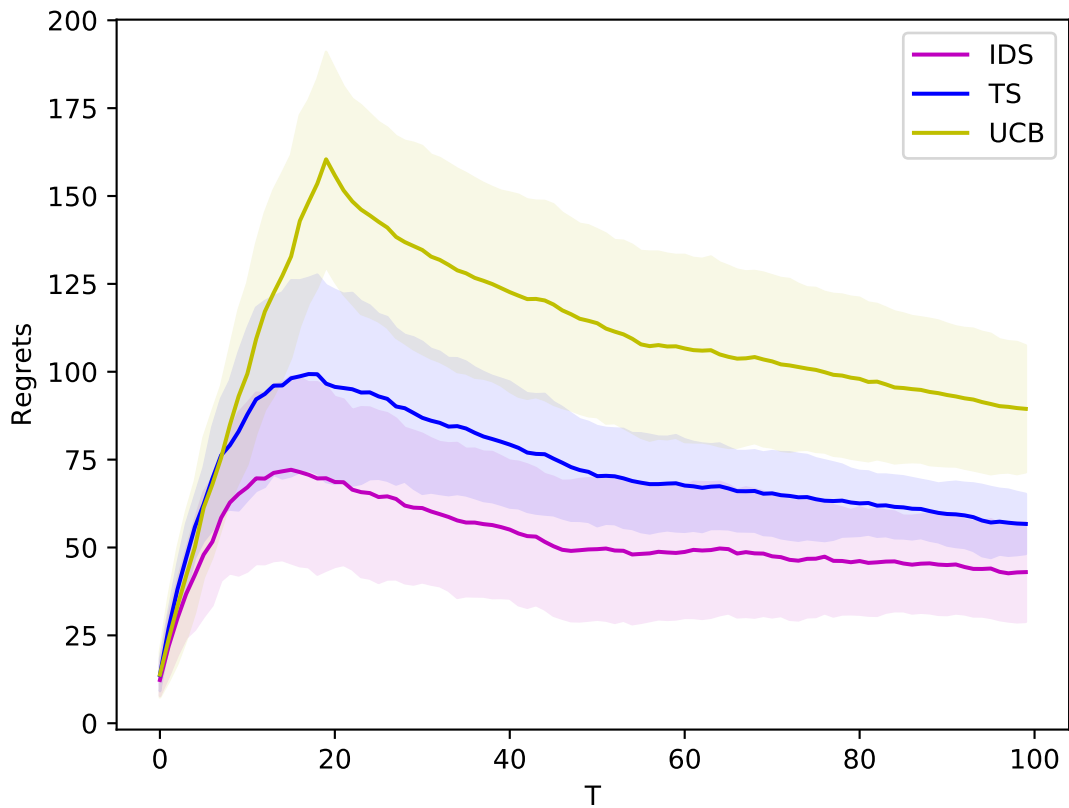

Supplement: Supplementary file 1 [file 07bc8125400bf4b140c332010756bd9b-Supplemental-Conference.zip › Code/selected_results/Linear/IDS-TS-UCB_vs_20220406-155945/IDS-TS-UCB_vs_20220406-155945_0_labeled.pdf]

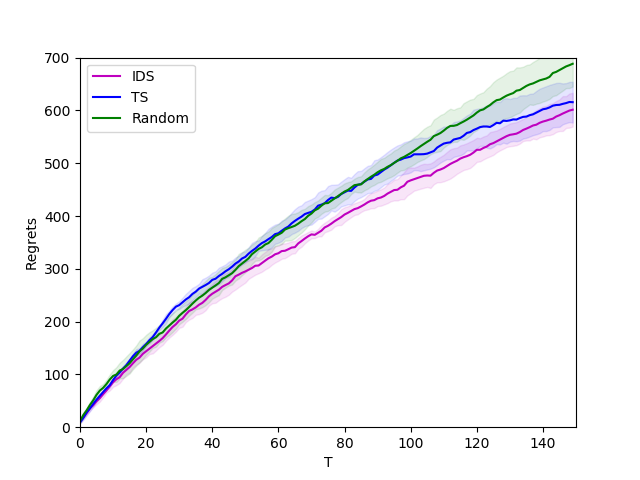

Supplement: Supplementary file 1 [file 07bc8125400bf4b140c332010756bd9b-Supplemental-Conference.zip › Code/selected_results/Matrix_high_noise/IDS-Greedy-Random_vs_20220407-225021/IDS-Greedy-Random_vs_20220407-225021_labeled.png]

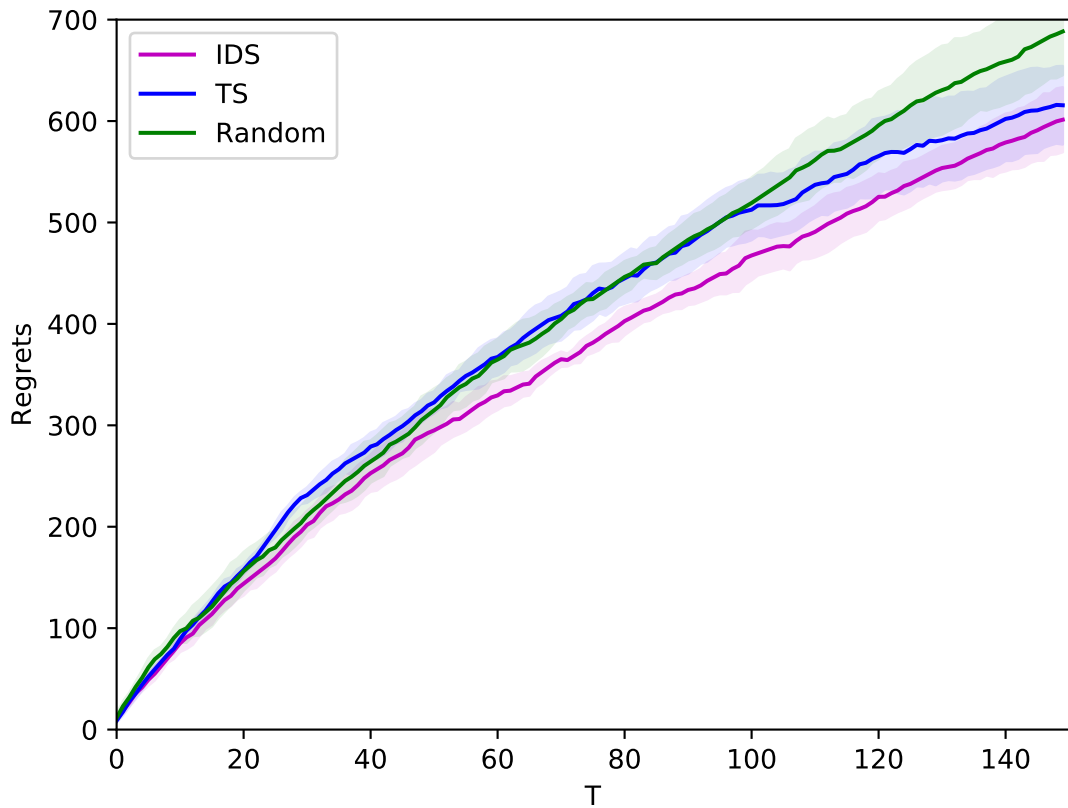

Supplement: Supplementary file 1 [file 07bc8125400bf4b140c332010756bd9b-Supplemental-Conference.zip › Code/selected_results/Matrix_high_noise/IDS-Greedy-Random_vs_20220407-225021/Matrix.pdf]

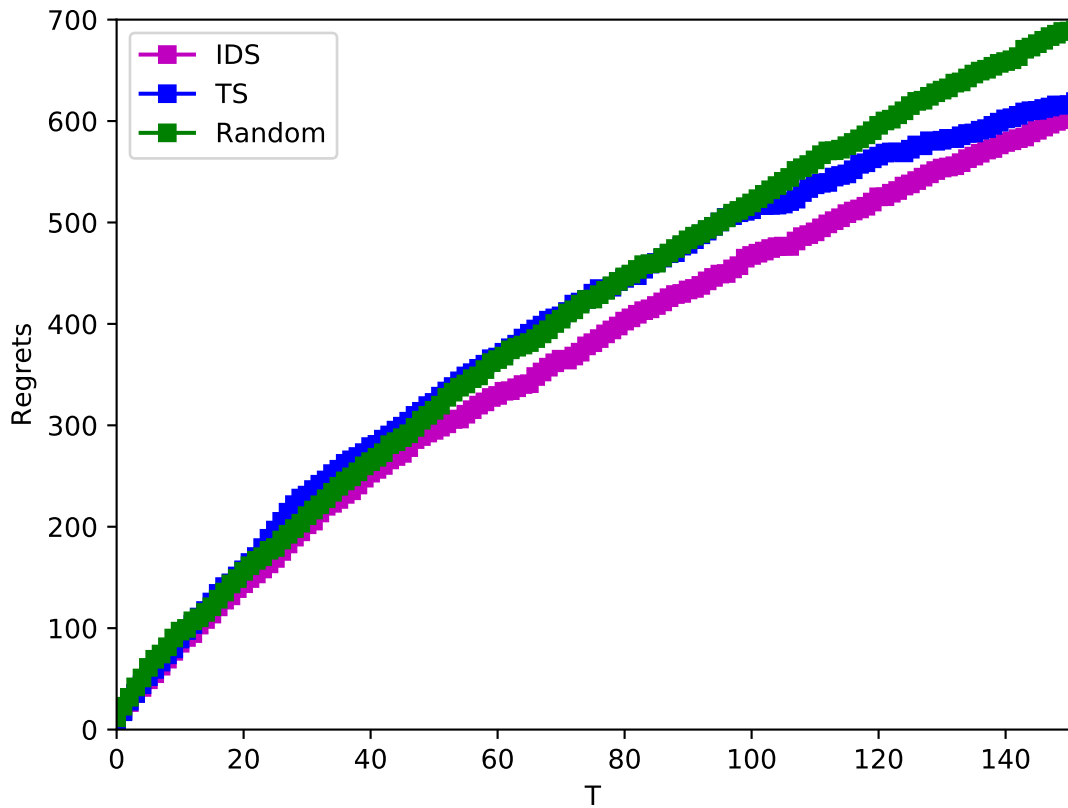

Supplement: Supplementary file 1 [file 07bc8125400bf4b140c332010756bd9b-Supplemental-Conference.zip › Code/selected_results/Matrix_high_noise/IDS-Greedy-Random_vs_20220401-100334/IDS-Greedy-Random_vs_20220401-100334_labeled.pdf]

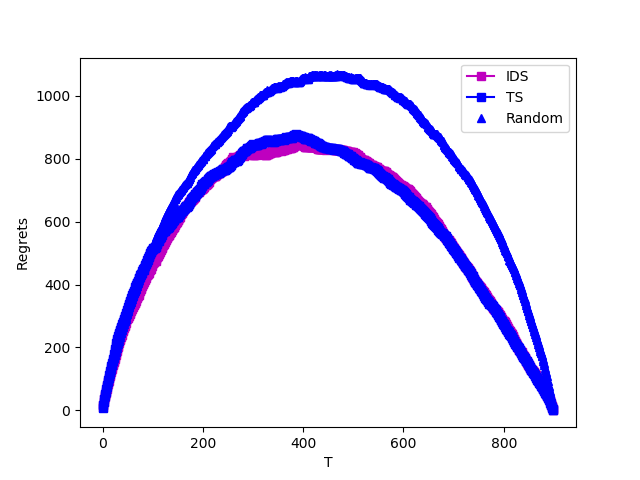

Supplement: Supplementary file 1 [file 07bc8125400bf4b140c332010756bd9b-Supplemental-Conference.zip › Code/selected_results/Matrix_high_noise/IDS-Greedy-Random_vs_20220331-214216/IDS-Greedy-Random_vs_20220331-214216_labeled.png]

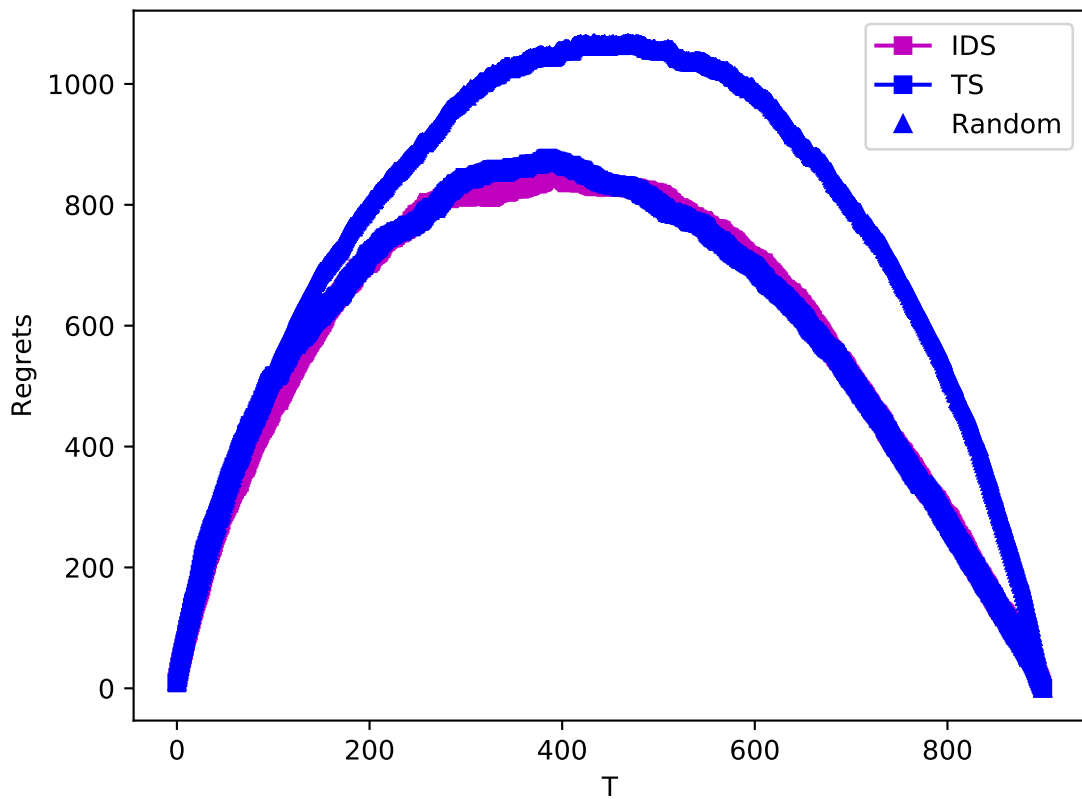

Supplement: Supplementary file 1 [file 07bc8125400bf4b140c332010756bd9b-Supplemental-Conference.zip › Code/selected_results/Matrix_high_noise/IDS-Greedy-Random_vs_20220331-214216/IDS-Greedy-Random_vs_20220331-214216_labeled.pdf]

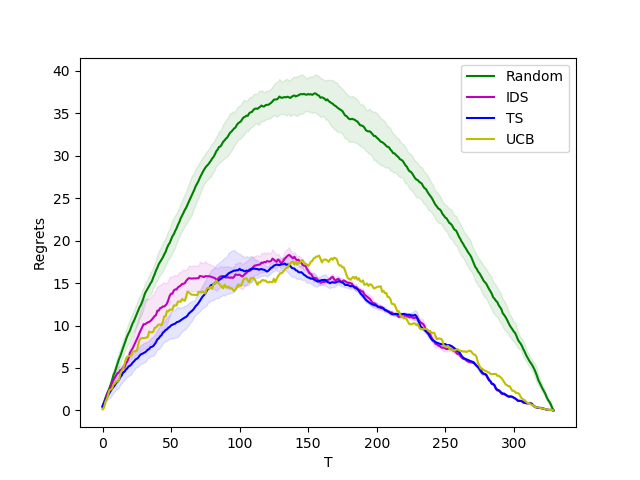

Supplement: Supplementary file 1 [file 07bc8125400bf4b140c332010756bd9b-Supplemental-Conference.zip › Code/selected_results/PNDC/Random-IDS-TS-UCB_vs_20220407-173801/Random-IDS-TS-UCB_vs_20220407-173801_labeled.png]

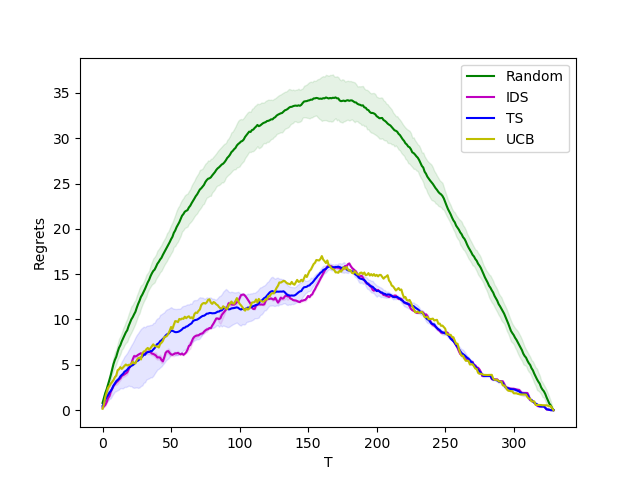

Supplement: Supplementary file 1 [file 07bc8125400bf4b140c332010756bd9b-Supplemental-Conference.zip › Code/selected_results/PNDC/Random-IDS-TS-UCB_vs_20220407-174645/Random-IDS-TS-UCB_vs_20220407-174645_labeled.png]

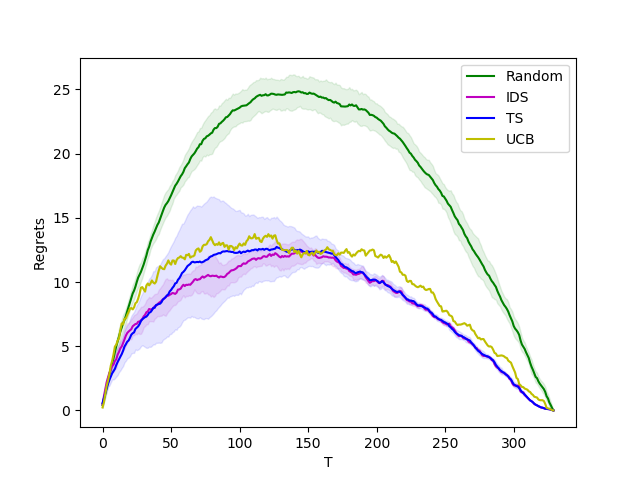

Supplement: Supplementary file 1 [file 07bc8125400bf4b140c332010756bd9b-Supplemental-Conference.zip › Code/selected_results/PNDC/Random-IDS-TS-UCB_vs_20220407-174901/Random-IDS-TS-UCB_vs_20220407-174901_labeled.png]

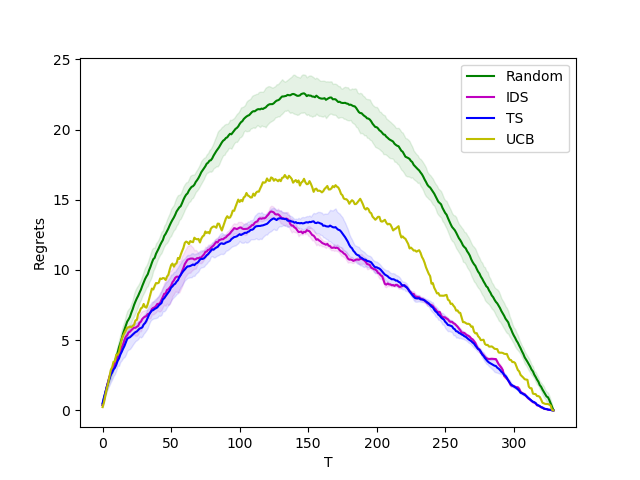

Supplement: Supplementary file 1 [file 07bc8125400bf4b140c332010756bd9b-Supplemental-Conference.zip › Code/selected_results/PNDC/Random-IDS-TS-UCB_vs_20220407-174436/Random-IDS-TS-UCB_vs_20220407-174436_labeled.png]

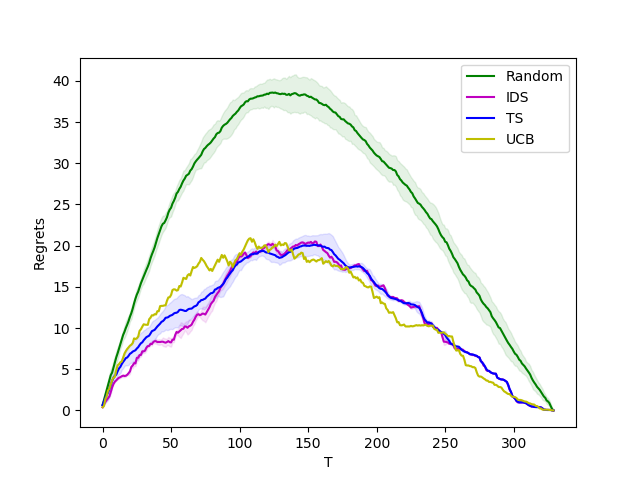

Supplement: Supplementary file 1 [file 07bc8125400bf4b140c332010756bd9b-Supplemental-Conference.zip › Code/selected_results/PNDC/Random-IDS-TS-UCB_vs_20220407-174224/Random-IDS-TS-UCB_vs_20220407-174224_labeled.png]

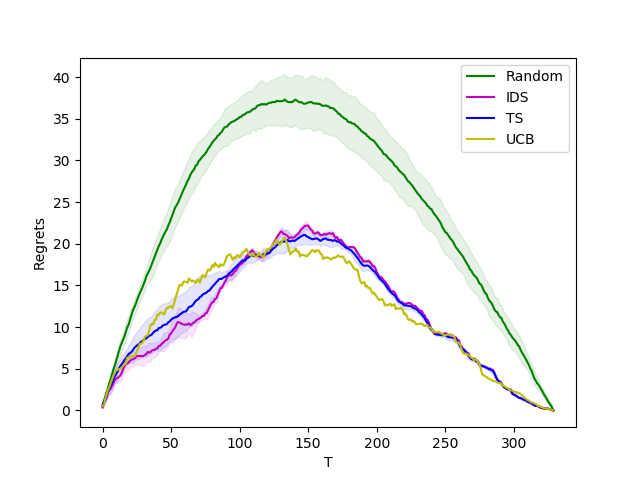

Supplement: Supplementary file 1 [file 07bc8125400bf4b140c332010756bd9b-Supplemental-Conference.zip › Code/selected_results/PNDC/Random-IDS-TS-UCB_vs_20220407-174011/Random-IDS-TS-UCB_vs_20220407-174011_labeled.png]

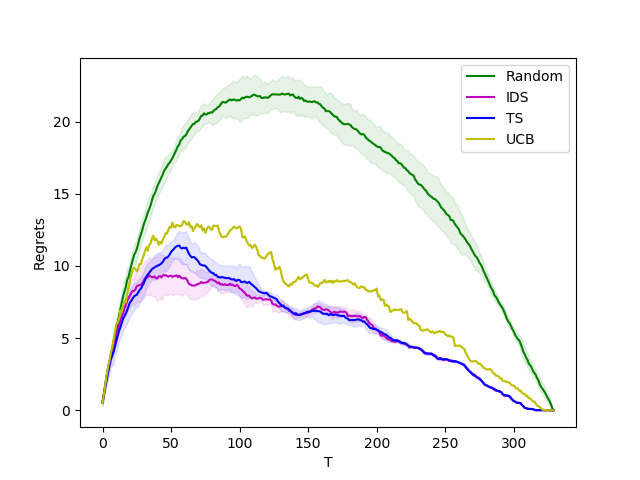

Supplement: Supplementary file 1 [file 07bc8125400bf4b140c332010756bd9b-Supplemental-Conference.zip › Code/selected_results/PNDC/Random-IDS-TS-UCB_vs_20220407-173542/Random-IDS-TS-UCB_vs_20220407-173542_labeled.png]

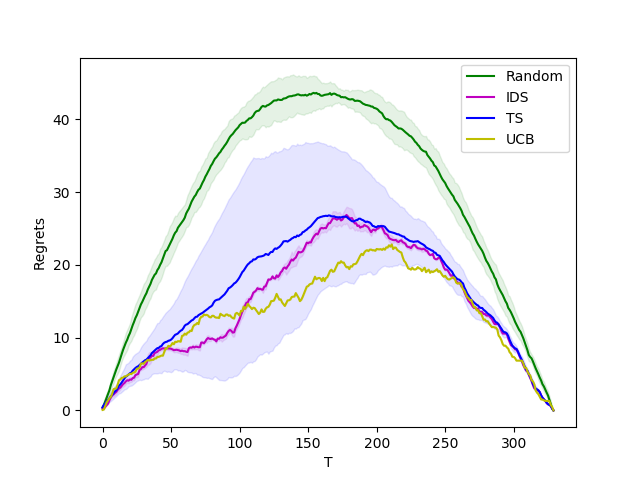

Supplement: Supplementary file 1 [file 07bc8125400bf4b140c332010756bd9b-Supplemental-Conference.zip › Code/selected_results/PNDC/Random-IDS-TS-UCB_vs_20220407-175310/Random-IDS-TS-UCB_vs_20220407-175310_labeled.png]

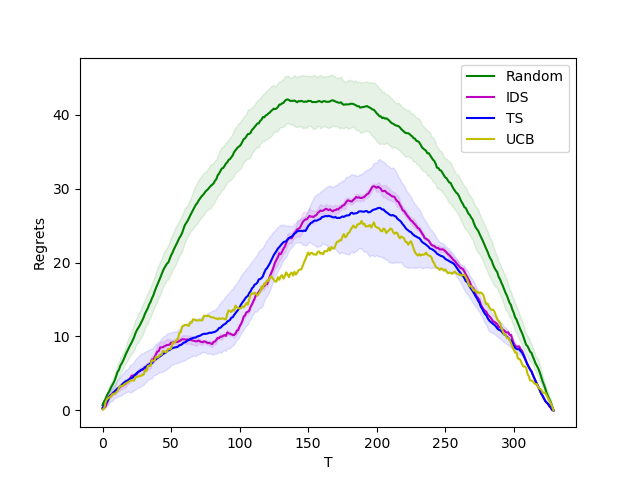

Supplement: Supplementary file 1 [file 07bc8125400bf4b140c332010756bd9b-Supplemental-Conference.zip › Code/selected_results/PNDC/Random-IDS-TS-UCB_vs_20220407-175112/Random-IDS-TS-UCB_vs_20220407-175112_labeled.png]

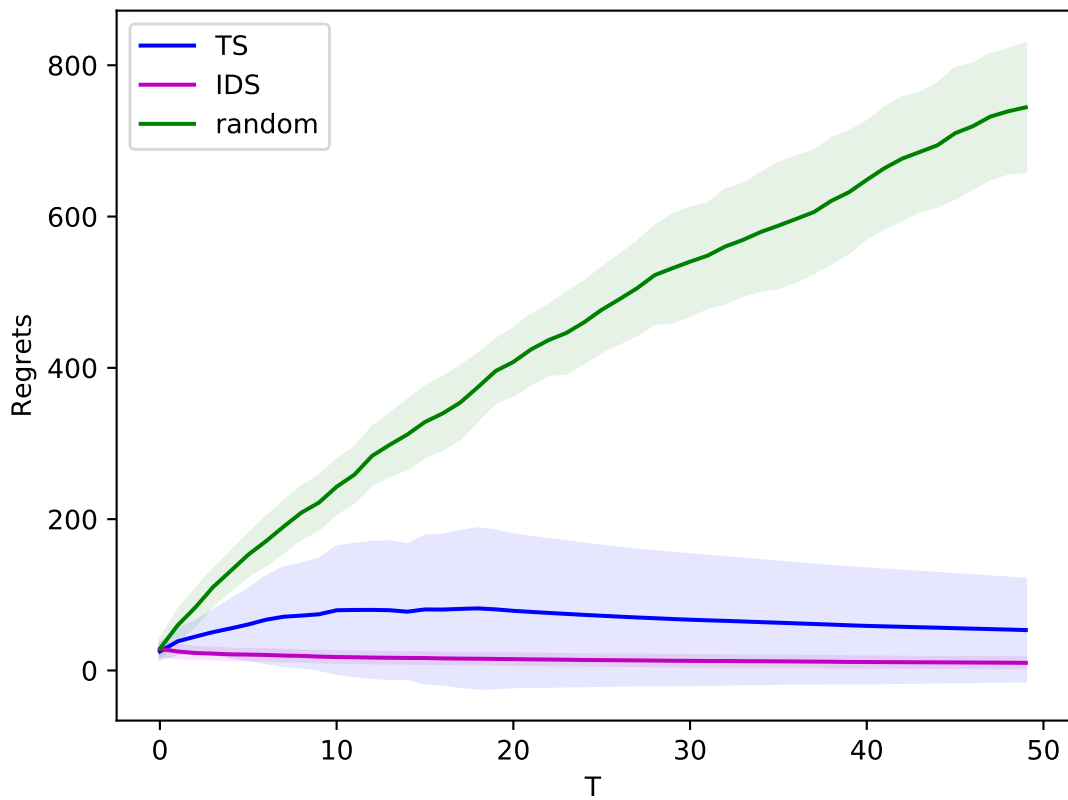

Supplement: Supplementary file 1 [file 07bc8125400bf4b140c332010756bd9b-Supplemental-Conference.zip › Code/selected_results/Graph_star/TS-IDS-Random_vs_20220406-174703/TS-IDS-Random_vs_20220406-174703_0_labeled.pdf]

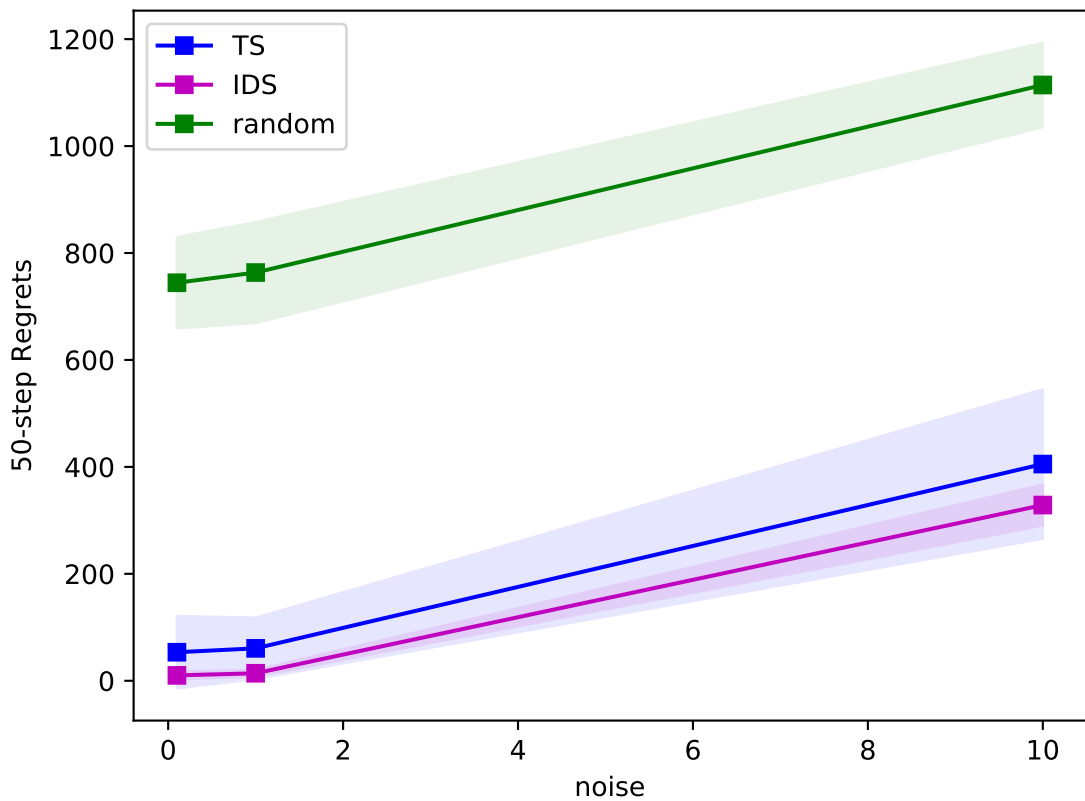

Supplement: Supplementary file 1 [file 07bc8125400bf4b140c332010756bd9b-Supplemental-Conference.zip › Code/selected_results/Graph_star/TS-IDS-Random_vs_20220406-174703/TS-IDS-Random_vs_20220406-174703_summarized_labeled.pdf]

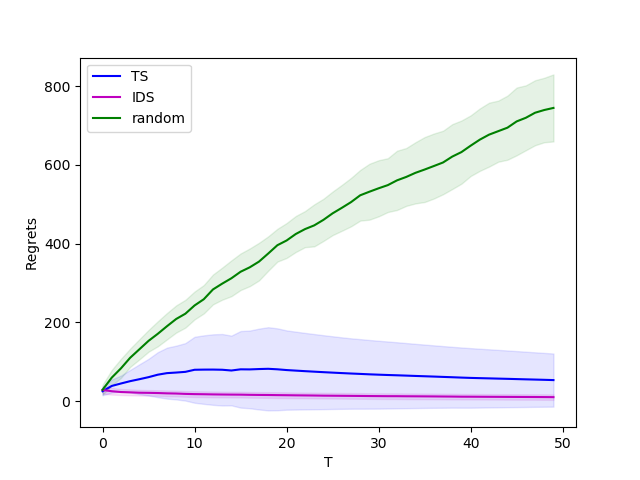

Supplement: Supplementary file 1 [file 07bc8125400bf4b140c332010756bd9b-Supplemental-Conference.zip › Code/selected_results/Graph_star/TS-IDS-Random_vs_20220406-174703/TS-IDS-Random_vs_20220406-174703_0_labeled.png]

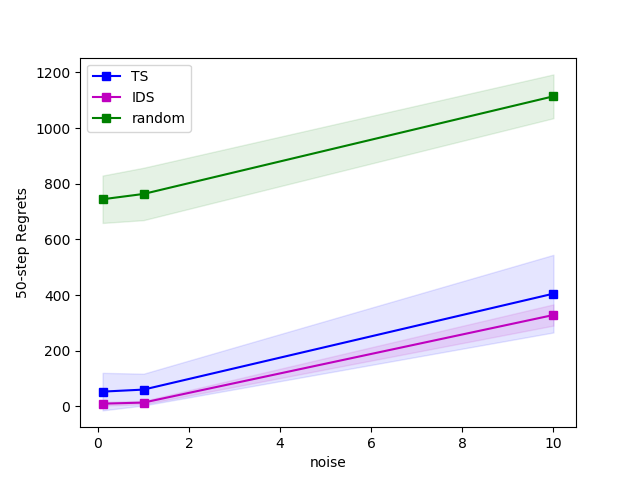

Supplement: Supplementary file 1 [file 07bc8125400bf4b140c332010756bd9b-Supplemental-Conference.zip › Code/selected_results/Graph_star/TS-IDS-Random_vs_20220406-174703/TS-IDS-Random_vs_20220406-174703_summarized_labeled.png]

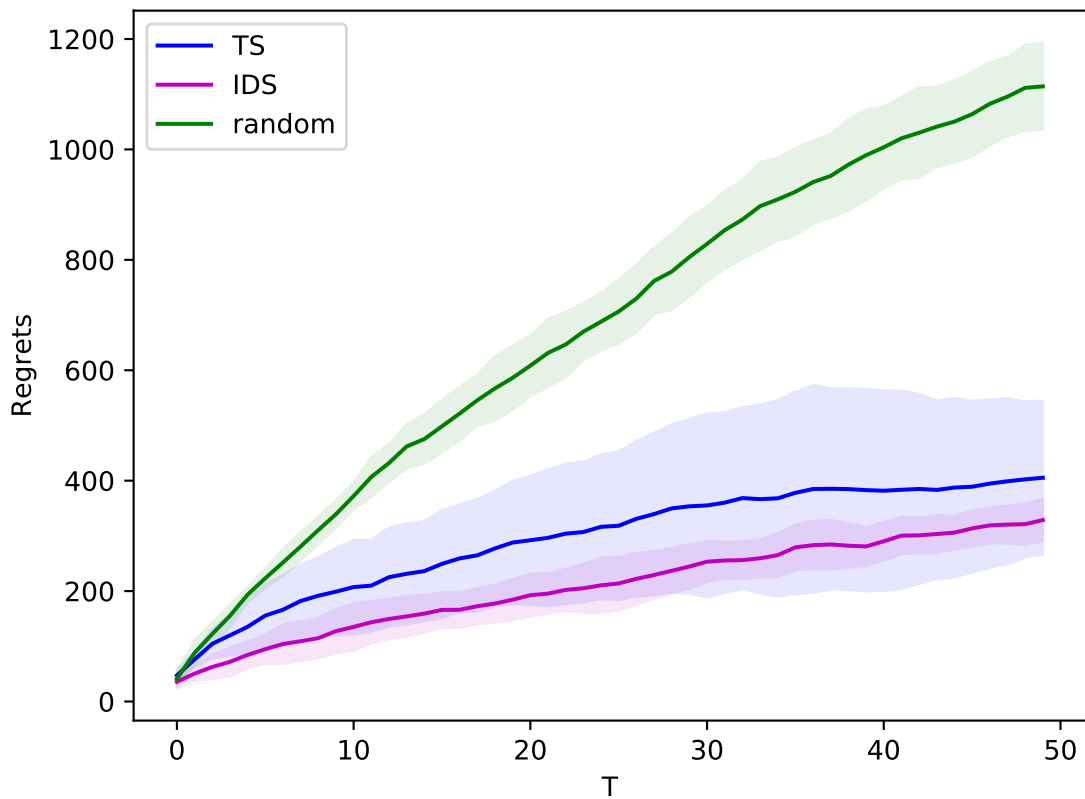

Supplement: Supplementary file 1 [file 07bc8125400bf4b140c332010756bd9b-Supplemental-Conference.zip › Code/selected_results/Graph_star/TS-IDS-Random_vs_20220406-174703/TS-IDS-Random_vs_20220406-174703_2_labeled.pdf]

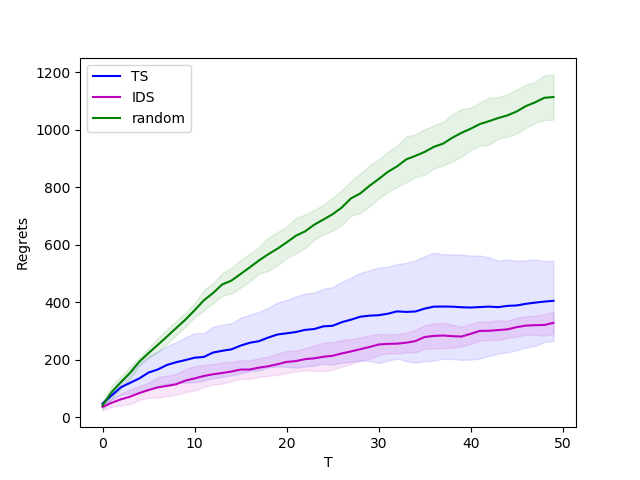

Supplement: Supplementary file 1 [file 07bc8125400bf4b140c332010756bd9b-Supplemental-Conference.zip › Code/selected_results/Graph_star/TS-IDS-Random_vs_20220406-174703/TS-IDS-Random_vs_20220406-174703_2_labeled.png]

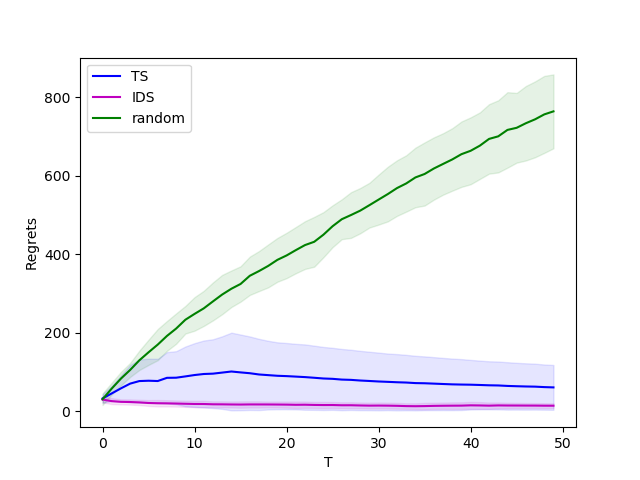

Supplement: Supplementary file 1 [file 07bc8125400bf4b140c332010756bd9b-Supplemental-Conference.zip › Code/selected_results/Graph_star/TS-IDS-Random_vs_20220406-174703/TS-IDS-Random_vs_20220406-174703_1_labeled.png]

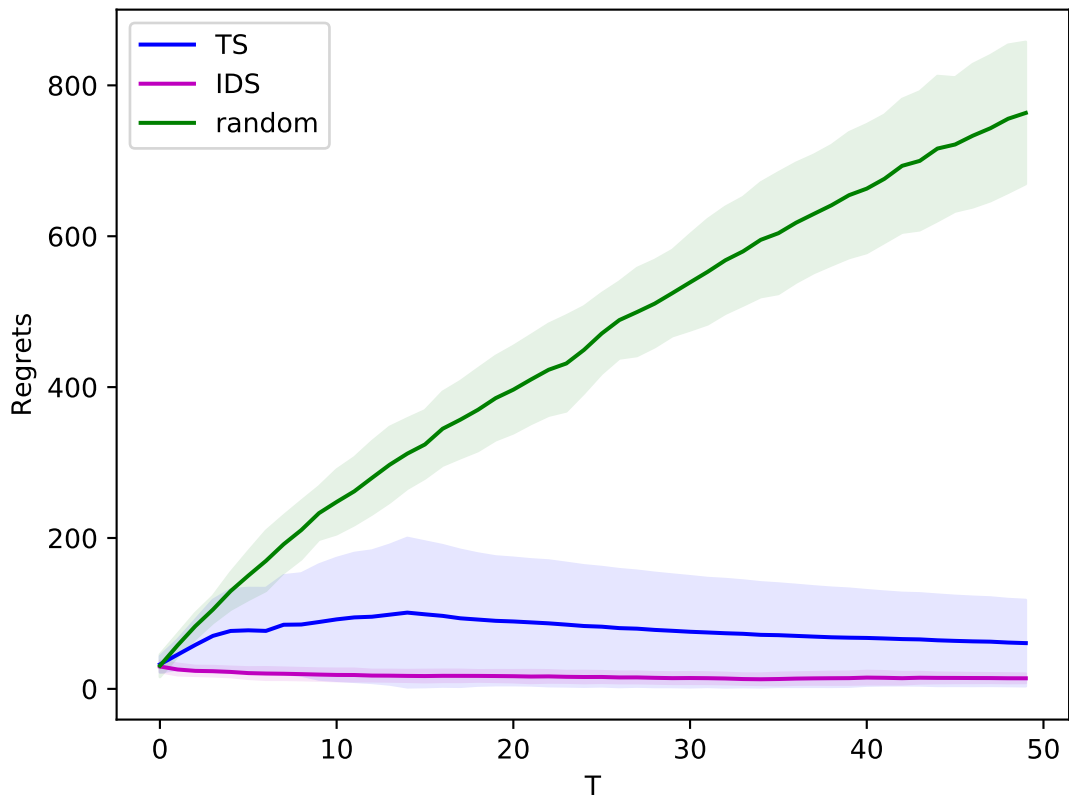

Supplement: Supplementary file 1 [file 07bc8125400bf4b140c332010756bd9b-Supplemental-Conference.zip › Code/selected_results/Graph_star/TS-IDS-Random_vs_20220406-174703/TS-IDS-Random_vs_20220406-174703_1_labeled.pdf]

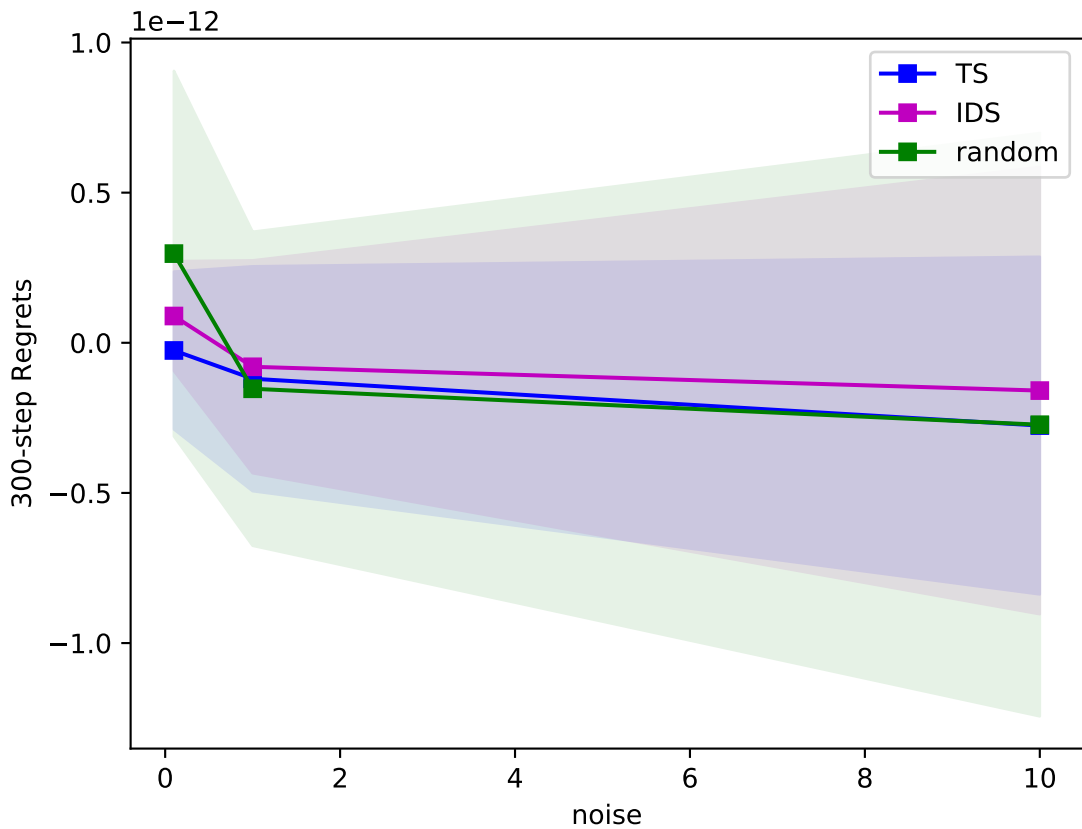

Supplement: Supplementary file 1 [file 07bc8125400bf4b140c332010756bd9b-Supplemental-Conference.zip › Code/selected_results/Graph_star/TS-IDS-Random_vs_20220406-173659/TS-IDS-Random_vs_20220406-173659_summarized_labeled.pdf]

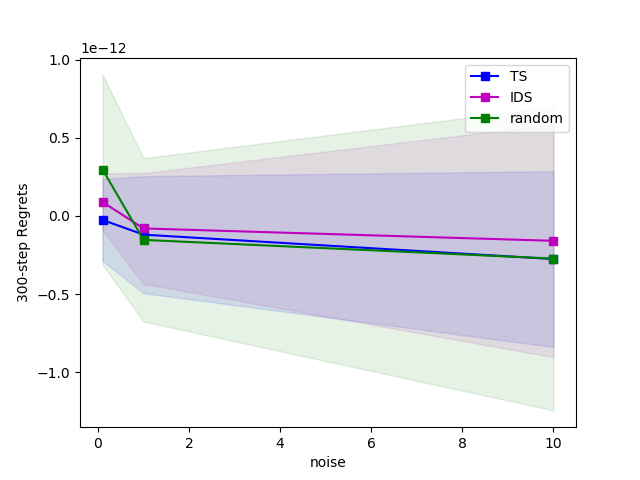

Supplement: Supplementary file 1 [file 07bc8125400bf4b140c332010756bd9b-Supplemental-Conference.zip › Code/selected_results/Graph_star/TS-IDS-Random_vs_20220406-173659/TS-IDS-Random_vs_20220406-173659_summarized_labeled.png]

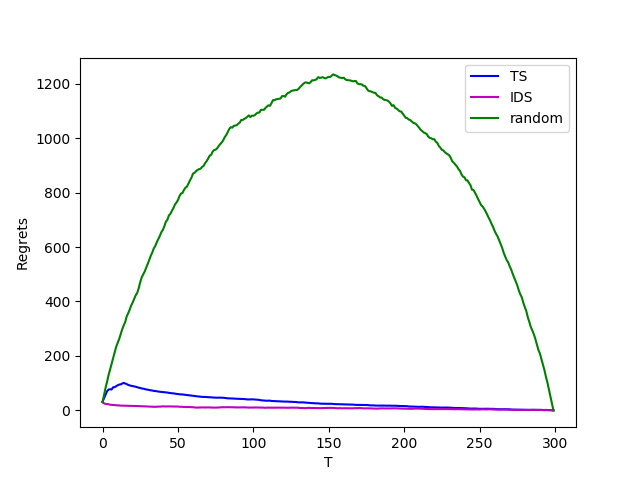

Supplement: Supplementary file 1 [file 07bc8125400bf4b140c332010756bd9b-Supplemental-Conference.zip › Code/selected_results/Graph_star/TS-IDS-Random_vs_20220406-173659/TS-IDS-Random_vs_20220406-173659_1.0_labeled.png]

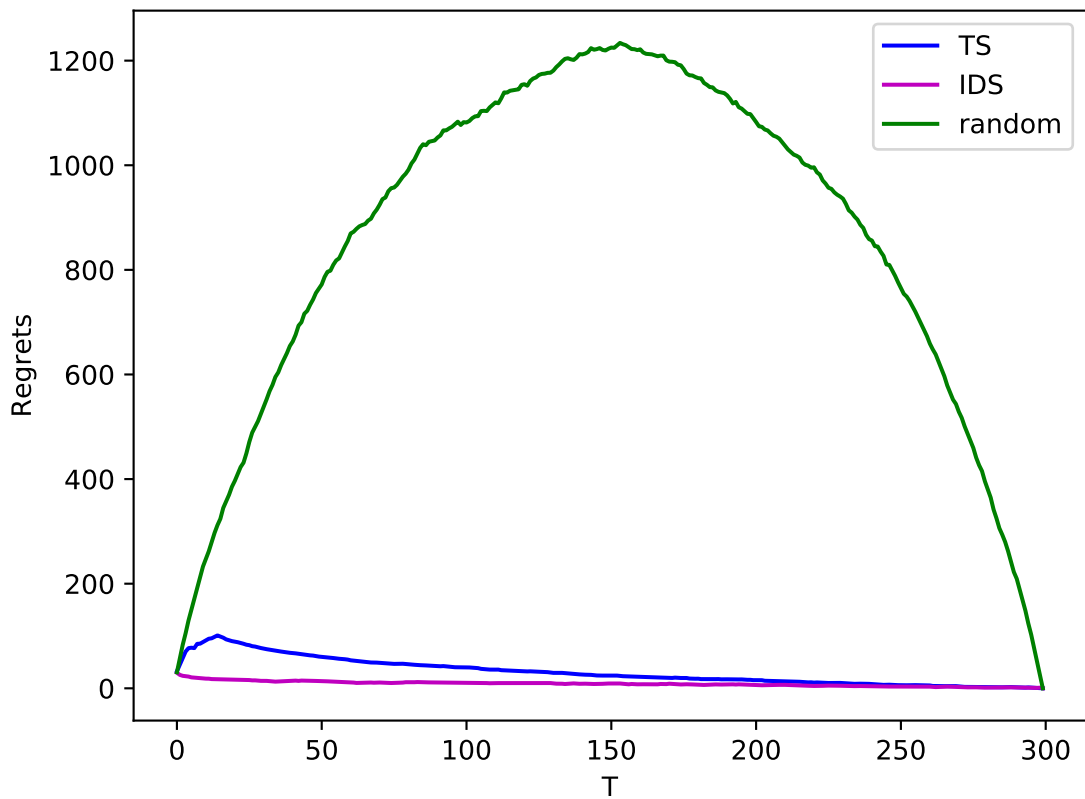

Supplement: Supplementary file 1 [file 07bc8125400bf4b140c332010756bd9b-Supplemental-Conference.zip › Code/selected_results/Graph_star/TS-IDS-Random_vs_20220406-173659/TS-IDS-Random_vs_20220406-173659_1.0_labeled.pdf]

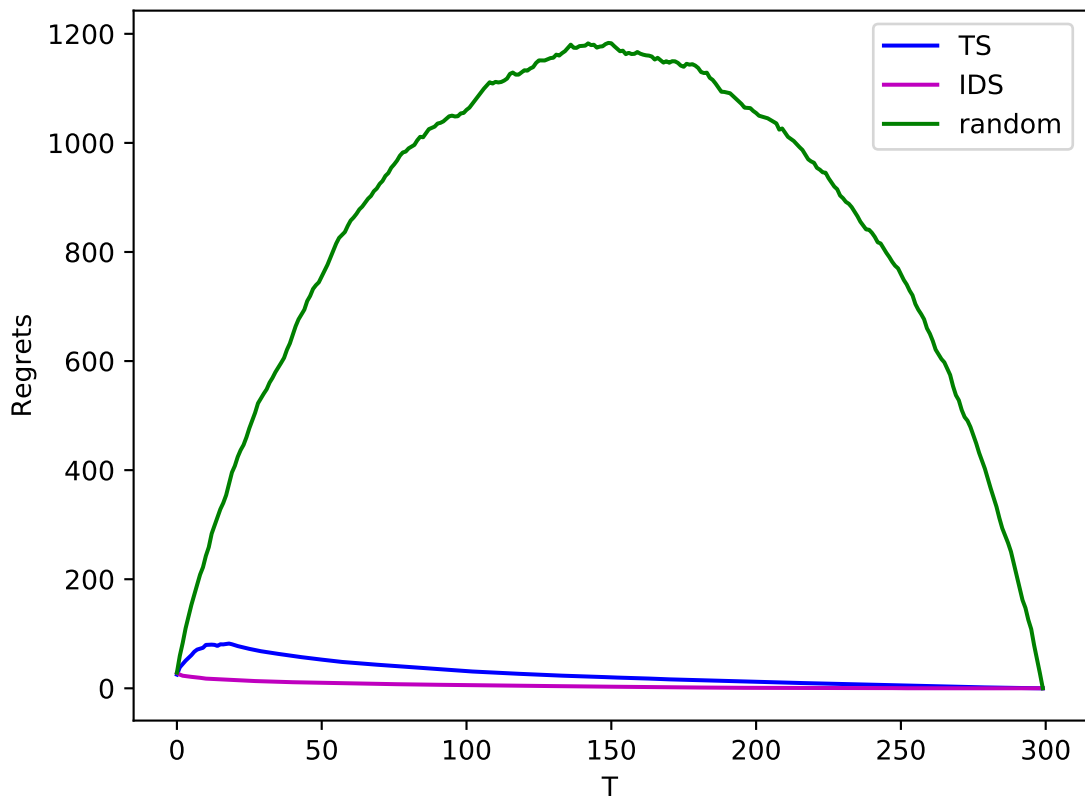

Supplement: Supplementary file 1 [file 07bc8125400bf4b140c332010756bd9b-Supplemental-Conference.zip › Code/selected_results/Graph_star/TS-IDS-Random_vs_20220406-173659/TS-IDS-Random_vs_20220406-173659_0.1_labeled.pdf]

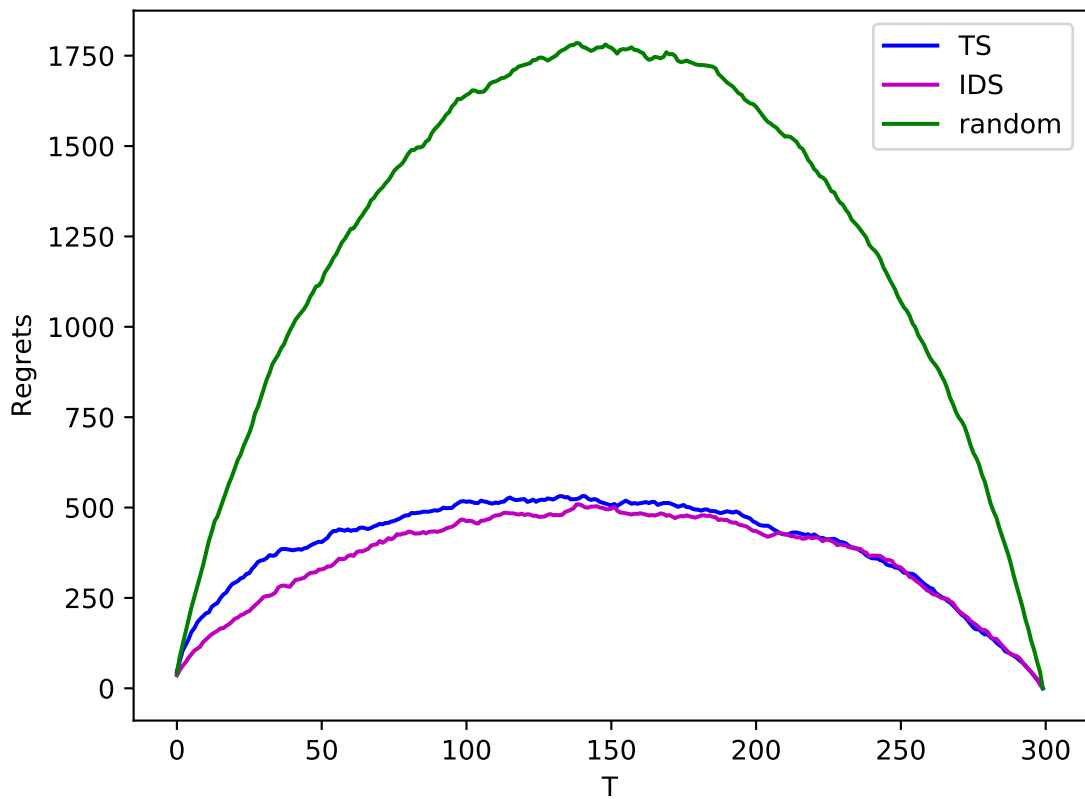

Supplement: Supplementary file 1 [file 07bc8125400bf4b140c332010756bd9b-Supplemental-Conference.zip › Code/selected_results/Graph_star/TS-IDS-Random_vs_20220406-173659/TS-IDS-Random_vs_20220406-173659_10.0_labeled.pdf]

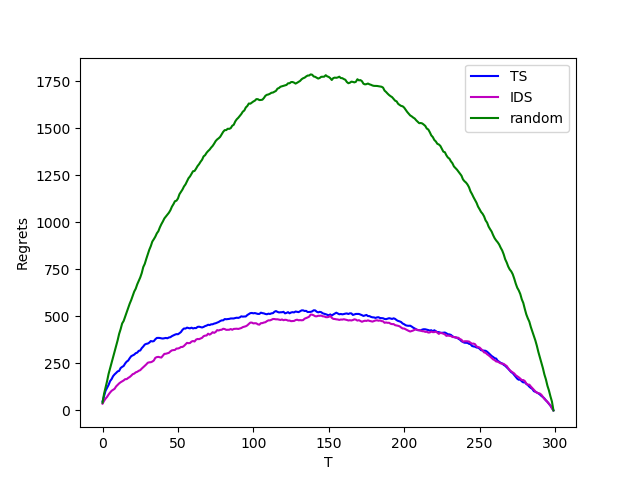

Supplement: Supplementary file 1 [file 07bc8125400bf4b140c332010756bd9b-Supplemental-Conference.zip › Code/selected_results/Graph_star/TS-IDS-Random_vs_20220406-173659/TS-IDS-Random_vs_20220406-173659_10.0_labeled.png]

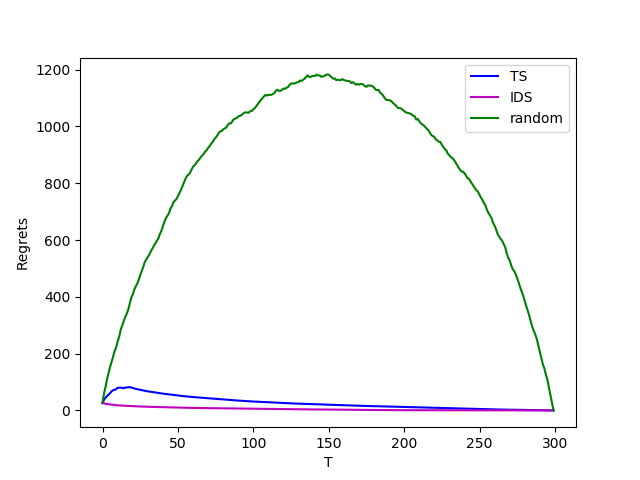

Supplement: Supplementary file 1 [file 07bc8125400bf4b140c332010756bd9b-Supplemental-Conference.zip › Code/selected_results/Graph_star/TS-IDS-Random_vs_20220406-173659/TS-IDS-Random_vs_20220406-173659_0.1_labeled.png]
